# Supplementary material for: Rbfox1 up-regulation impairs BDNF-dependent hippocampal LTP by dysregulating TrkB isoform expression levels
Source: eLife. 2019 Aug 20;8:e49673. doi: 10.7554/eLife.49673 (PMC6715404; doi:10.7554/eLife.49673)
Supplement: Supplementary file 1. [file elife-49673-supp1.xlsx]

## Sheet: N-cre-Fox1
transcriptID	geneID	FDR	PPDE	PostFC	C1Mean	C2Mean	logPostFC
ENSMUST00000210479.1	Ppfia3	0	1	7.76584	160.091	20.0789	2.95714
ENSMUST00000064740.8	Suclg1	0	1	1.50417	6242.25	4149.85	0.588967
ENSMUST00000111315.8	Adamts4	0	1	34.9356	1417.85	39.9873	5.12663
ENSMUST00000074875.10	Bcas3	0	1	215.684	132.035	0	7.75277
ENSMUST00000114050.7	Tmsb10	0	1	1.57664	3975.18	2521.07	0.656856
ENSMUST00000069902.12	Nnt	0	1	0.35274	88.3341	251.551	-1.50332
ENSMUST00000225195.1	Kdm3b	0	1	0.453758	189.239	417.787	-1.14
ENSMUST00000134778.2	Mars	0	1	10.5732	55.6751	4.70885	3.40233
ENSMUST00000119141.7	Pxylp1	0	1	142.092	86.7745	0	7.15068
ENSMUST00000219033.1	Adamts4	0	1	0.0431508	58.7511	1375.17	-4.53447
ENSMUST00000202579.3	Ptprz1	0	1	0.533378	2167.8	4064.58	-0.906769
ENSMUST00000202102.1	Ptprz1	0	1	1.89548	4458.64	2351.95	0.922565
ENSMUST00000171509.8	Fgfr3	0	1	3.51057	212.57	60.1117	1.8117
ENSMUST00000017808.13	Slc35c2	0	1	0.368267	133.907	364.669	-1.44118
ENSMUST00000224954.1	Daam2	0	1	0.644853	4461.82	6919.32	-0.632959
ENSMUST00000154650.7	Bcas1	2.22045e-16	1	1.38485	7723.64	5577.07	0.469729
ENSMUST00000032383.13	Sspn	0	1	1.4594	965.347	661.276	0.545373
ENSMUST00000114498.7	Hnmt	0	1	0.100182	36.6699	371.556	-3.3193
ENSMUST00000029563.13	Adar	0	1	16.992	211.794	11.8855	4.08678
ENSMUST00000197364.4	Arhgef9	0	1	80.2723	48.7541	0	6.32683
ENSMUST00000212211.1	Slc27a1	0	1	0.715719	574.977	803.601	-0.482536
ENSMUST00000153558.7	Scamp1	0	1	170.758	104.405	0	7.41581
ENSMUST00000189017.7	Fat1	0	1	3.67251	790.821	214.887	1.87677
ENSMUST00000119299.7	Ogt	4.44089e-16	1	1.75046	609.215	347.768	0.807732
ENSMUST00000195373.1	Mrpl30	7.77156e-16	1	19.9677	131.534	6.00314	4.31959
ENSMUST00000126853.7	Ptpn12	1.44329e-15	1	7.18932	46.6661	5.96156	2.84585
ENSMUST00000226107.1	Parp8	3.77476e-15	1	0.308696	72.6269	236.647	-1.69574
ENSMUST00000060397.12	Rfx4	3.66374e-15	1	1.40752	615.344	437.004	0.49316
ENSMUST00000132918.7	Orc3	5.66214e-15	1	0.271986	24.4088	91.3889	-1.87839
ENSMUST00000114464.8	Slc6a8	2.10942e-14	1	0.335487	264.848	790.661	-1.57567
ENSMUST00000106283.7	Rims3	3.31957e-14	1	8.65316	603.979	69.2548	3.11323
ENSMUST00000095849.9	Prdm15	2.01172e-13	1	1.98916	206.011	103.261	0.992161
ENSMUST00000151319.7	Azin1	3.1275e-13	1	2.67589	99.7145	36.8789	1.42002
ENSMUST00000105914.1	Ahdc1	6.13065e-13	1	1.38867	2222.6	1600.35	0.473702
ENSMUST00000151452.7	Pkp4	1.16218e-12	1	0.763878	1711.15	2240.27	-0.388586
ENSMUST00000111221.8	Mettl27	2.04958e-12	1	0.122331	9.59433	82.8417	-3.03114
ENSMUST00000111894.1	Smco3	2.18758e-12	1	0.119269	5.03695	46.7736	-3.06771
ENSMUST00000109838.9	Ntrk2	7.94442e-12	1	1.18253	16923	14310.9	0.241871
ENSMUST00000113712.9	Tia1	1.96041e-11	1	0.710045	1795.08	2528.38	-0.494018
ENSMUST00000148223.7	Sigmar1	2.79051e-11	1	3.08093	95.6516	30.631	1.62336
ENSMUST00000065504.16	Anxa7	3.69141e-11	1	4.16442	73.3061	17.1356	2.05811
ENSMUST00000161915.7	Zdhhc4	4.44872e-11	1	2.33299	135.397	57.6844	1.22218
ENSMUST00000190731.6	Sytl2	7.25755e-11	1	0.236307	33.3961	143.313	-2.08126
ENSMUST00000068023.7	Cadm4	1.10827e-10	1	0.924347	7878.2	8523.02	-0.113494
ENSMUST00000175776.7	Eps15	1.22588e-10	1	2.97529	173.276	57.8302	1.57303
ENSMUST00000227605.1	Nrbp2	1.62717e-10	1	0.779365	726.488	932.327	-0.359628
ENSMUST00000124102.7	Atp6v1a	1.96668e-10	1	0.122804	3.01747	28.9645	-3.02557
ENSMUST00000003351.12	Grin2c	2.00558e-10	1	0.787221	1913.55	2430.93	-0.34516
ENSMUST00000146551.1	Gtpbp3	4.7432e-10	1	0.281252	13.7089	50.314	-1.83006
ENSMUST00000078953.7	Dennd6b	8.49273e-10	1	0.908137	4012.05	4417.92	-0.139019
ENSMUST00000147580.7	Ric3	9.70318e-10	1	0.676847	411.823	608.737	-0.563098
ENSMUST00000040912.8	Anln	1.14104e-09	1	0.830274	1523.43	1834.92	-0.268341
ENSMUST00000073124.8	Zfp746	1.25218e-09	1	1.42771	707.763	495.549	0.513703
ENSMUST00000077200.3	Pak7	1.59208e-09	1	1.4012	488.244	348.272	0.48666
ENSMUST00000055676.3	S1pr1	3.04701e-09	1	1.09202	7515.45	6882.13	0.126998
ENSMUST00000006221.13	Vps54	3.79076e-09	1	1.59842	736.316	460.421	0.67665
ENSMUST00000207941.1	Pnpla6	3.82672e-09	1	0.545625	287.947	528.25	-0.874018
ENSMUST00000032729.7	Tjp1	4.64205e-09	1	1.17725	2943.03	2499.83	0.235421
ENSMUST00000029700.11	Sema4a	5.62696e-09	1	0.51378	165.249	322.216	-0.960777
ENSMUST00000072695.12	Tle1	5.94003e-09	1	1.6056	842.313	524.378	0.683111
ENSMUST00000156910.1	Hook1	5.9973e-09	1	0.865051	1915.11	2213.97	-0.209142
ENSMUST00000034458.8	Galnt2	7.34681e-09	1	1.19661	2111.74	1764.66	0.258958
ENSMUST00000224227.1	Sorbs1	1.13064e-08	1	1.4794	353.495	238.745	0.565015
ENSMUST00000098550.3	Zfp791	1.24535e-08	1	10.5006	29.9875	2.29935	3.39239
ENSMUST00000139946.7	Ash2l	1.36146e-08	1	2.38382	172.73	72.1024	1.25328
ENSMUST00000120591.7	Pisd	2.80406e-08	1	1.78936	347.492	193.927	0.839447
ENSMUST00000194652.5	Aida	3.03492e-08	1	12.7652	24.5625	1.35734	3.67414
ENSMUST00000169345.3	Syn2	3.13036e-08	1	5.10137	336.298	65.4285	2.35089
ENSMUST00000145267.1	Srsf11	3.25663e-08	1	3.47003	74.3282	20.9823	1.79495
ENSMUST00000119063.7	Acvrl1	3.74839e-08	1	0.435426	40.2868	93.3203	-1.1995
ENSMUST00000084846.11	Srrm1	3.91637e-08	1	0.80014	1981.85	2477.03	-0.321675
ENSMUST00000144425.1	Atp1b2	4.20419e-08	1	1.6398	207.768	126.463	0.713521
ENSMUST00000137985.1	Abcc5	4.30974e-08	1	4.87015	52.9108	10.3756	2.28396
ENSMUST00000111303.1	Dgkz	5.80245e-08	1	1.28122	993.182	775.047	0.357522
ENSMUST00000082243.6	Spire1	8.23574e-08	1	1.1692	3509.18	3001.27	0.225519
ENSMUST00000105097.2	Zswim6	8.57299e-08	1	1.43243	1129.36	788.236	0.518462
ENSMUST00000072249.12	Cdv3	8.7379e-08	1	1.15716	2983.26	2578.01	0.210586
ENSMUST00000188712.6	Fam135a	9.47953e-08	1	1.42157	321.192	225.76	0.507481
ENSMUST00000099492.9	Midn	1.47819e-07	1	1.19566	2112.59	1766.78	0.25781
ENSMUST00000130575.7	Prpf40b	1.53497e-07	1	0.584502	365.155	625.165	-0.77472
ENSMUST00000201452.3	Hsph1	1.54299e-07	1	0.403214	44.2071	110.547	-1.31038
ENSMUST00000115841.9	Rbfox1	1.81856e-07	1	1.28223	2271.51	1771.39	0.358656
ENSMUST00000111861.3	Pdcd6ip	2.05656e-07	1	1.4077	555.946	394.755	0.493338
ENSMUST00000106667.1	Ampd2	2.19405e-07	1	2.06644	92.461	44.4268	1.04714
ENSMUST00000026585.13	Tspan4	2.23483e-07	1	0.490885	61.1457	125.2	-1.02654
ENSMUST00000022699.9	Gfra2	2.59775e-07	1	0.862828	1447.32	1677.47	-0.212856
ENSMUST00000110688.8	Ank1	3.03563e-07	1	2.49645	203.637	81.202	1.31988
ENSMUST00000120119.8	Pgap2	3.12306e-07	1	53.1234	32.057	0	5.73128
ENSMUST00000095267.5	Jund	4.47784e-07	1	1.12758	2949.71	2615.94	0.173224
ENSMUST00000175774.8	Pou2f2	4.76903e-07	1	0.746927	446.509	598.003	-0.420962
ENSMUST00000036127.8	Hsf4	5.47571e-07	0.999999	0.707435	264.857	374.645	-0.499331
ENSMUST00000114950.1	Galnt11	7.16413e-07	0.999999	2.58665	422.134	162.82	1.37109
ENSMUST00000176849.7	Hnrnpk	7.29495e-07	0.999999	1.20201	1158.93	964.059	0.265449
ENSMUST00000107745.7	Gria2	7.46135e-07	0.999999	1.10156	12510.3	11356.8	0.13955
ENSMUST00000045105.12	Spire1	7.9231e-07	0.999999	0.681591	1037.38	1522.28	-0.553023
ENSMUST00000021052.15	Smarcd2	8.55979e-07	0.999999	1.35046	428.854	317.401	0.433454
ENSMUST00000110853.7	Pak6	1.02979e-06	0.999999	1.40214	842.264	600.524	0.487627
ENSMUST00000111140.2	Lmo2	1.28656e-06	0.999999	2.14045	95.7156	44.3897	1.09792
ENSMUST00000177946.7	Prom1	1.36839e-06	0.999999	0.627522	109.371	174.656	-0.672263
ENSMUST00000128876.7	Nelfb	1.37885e-06	0.999999	1.58638	476.981	300.445	0.665741
ENSMUST00000106080.7	Phc2	1.45855e-06	0.999999	0.160056	74.8093	470.623	-2.64335
ENSMUST00000148881.7	Scamp3	1.4811e-06	0.999999	0.130452	5.50771	46.3197	-2.93841
ENSMUST00000166689.1	Tsr2	1.80161e-06	0.999998	0.201348	15.5516	79.677	-2.31224
ENSMUST00000159109.1	Zfp609	2.40848e-06	0.999998	1.09519	4075.43	3721.18	0.131184
ENSMUST00000118426.7	Stmn4	2.58283e-06	0.999997	0.53888	299.716	556.71	-0.891965
ENSMUST00000074970.7	Nmral1	2.86723e-06	0.999997	0.408862	29.2885	72.5234	-1.29032
ENSMUST00000106312.3	Zfp553	2.92954e-06	0.999997	1.45924	568.695	389.528	0.545212
ENSMUST00000138052.7	Per3	3.3318e-06	0.999997	0.755155	1114.3	1475.79	-0.405156
ENSMUST00000026436.9	Baiap2	4.00762e-06	0.999996	1.35902	1408.73	1036.42	0.442567
ENSMUST00000212899.1	Gm42047	4.35359e-06	0.999996	1.62781	320.141	196.433	0.70293
ENSMUST00000156123.1	Btbd11	4.46163e-06	0.999996	0.483558	37.2474	77.6846	-1.04824
ENSMUST00000111356.7	Nr1h3	5.00612e-06	0.999995	5.65294	26.8585	4.24503	2.499
ENSMUST00000137726.7	Acap3	5.4355e-06	0.999995	1.2714	1120.68	881.32	0.346422
ENSMUST00000100794.9	Myo18a	5.71387e-06	0.999994	2.80215	698.533	248.889	1.48653
ENSMUST00000144125.7	Otof	6.85326e-06	0.999993	0.518793	85.3178	165.025	-0.946768
ENSMUST00000114897.8	Atp5c1	8.01286e-06	0.999992	0.926264	7216.63	7791.17	-0.110505
ENSMUST00000117859.7	D930048N14Rik	9.59004e-06	0.99999	0.509471	129.262	254.309	-0.972927
ENSMUST00000106046.7	Zbtb8b	1.04889e-05	0.99999	6.618	229.804	34.202	2.72639
ENSMUST00000112685.7	Fgd1	1.0659e-05	0.999989	1.388	611.247	440.206	0.473013
ENSMUST00000115642.7	Hdac6	1.091e-05	0.999989	0.843915	1579.92	1872.25	-0.244831
ENSMUST00000022746.12	Osmr	1.11091e-05	0.999989	1.36137	317.525	233.147	0.445064
ENSMUST00000218414.1	Fam207a	1.27335e-05	0.999987	6.96497	37.4549	4.8509	2.80012
ENSMUST00000177467.7	Trub2	1.32885e-05	0.999987	0.164815	2.6535	19.2164	-2.60108
ENSMUST00000221104.1	Btbd6	1.3362e-05	0.999987	0.580747	329.909	568.52	-0.784017
ENSMUST00000140165.1	Nr4a2	1.40658e-05	0.999986	2.01618	87.3126	42.9959	1.01163
ENSMUST00000225980.1	Atp9b	1.44149e-05	0.999986	1.34385	933.249	694.302	0.426373
ENSMUST00000096744.7	Myadm	1.48833e-05	0.999985	0.256141	275.282	1076.52	-1.96499
ENSMUST00000069828.9	Thsd1	1.54444e-05	0.999985	2.08818	83.525	39.6784	1.06225
ENSMUST00000062957.7	Ttc7b	1.55223e-05	0.999984	0.90028	3010.47	3343.99	-0.151554
ENSMUST00000132534.3	Fubp3	1.55617e-05	0.999984	0.556671	68.9968	124.435	-0.845103
ENSMUST00000222583.1	Dtnbp1	1.78483e-05	0.999982	4.0117	29.2525	6.83008	2.00421
ENSMUST00000133066.1	Cmpk1	1.87558e-05	0.999981	2.11922	92.5548	43.3492	1.08353
ENSMUST00000179337.8	Anks1b	1.92593e-05	0.999981	0.759606	363.301	478.47	-0.396676
ENSMUST00000026519.9	4833420G17Rik	2.06808e-05	0.999979	1.21072	1010.67	834.665	0.275861
ENSMUST00000077709.10	Tmem268	2.37721e-05	0.999976	0.710971	288.582	406.149	-0.492137
ENSMUST00000115364.7	Cdk16	2.52566e-05	0.999975	1.45241	471.244	324.266	0.538448
ENSMUST00000034171.8	Ap1g1	2.77857e-05	0.999972	1.61579	329.58	203.74	0.692243
ENSMUST00000198990.1	Cdk5	3.0799e-05	0.999969	6.96429	77.9496	10.6661	2.79998
ENSMUST00000067137.13	Tprkb	3.1245e-05	0.999969	1.15484	3023.19	2617.77	0.207688
ENSMUST00000137216.1	Kalrn	3.29063e-05	0.999967	1.33818	419.688	313.538	0.420275
ENSMUST00000061446.7	Tmem130	3.88137e-05	0.999961	0.9331	8086.57	8666.37	-0.0998962
ENSMUST00000130256.2	B930095G15Rik	3.96042e-05	0.99996	0.820649	3316.33	4041.17	-0.285162
ENSMUST00000073430.13	Stx5a	3.9815e-05	0.99996	0.790682	1264.88	1599.9	-0.338831
ENSMUST00000125122.1	Zzef1	4.29848e-05	0.999957	0.840136	1312.36	1562.15	-0.251305
ENSMUST00000092966.4	Dynlt1c	4.56853e-05	0.999954	2.75	48.5287	17.2554	1.45943
ENSMUST00000038234.12	Ift122	4.93057e-05	0.999951	1.4742	695.839	471.813	0.559934
ENSMUST00000168810.8	Nrg3	5.10756e-05	0.999949	1.91445	114.583	59.5579	0.936927
ENSMUST00000062092.6	Cdca4	5.22151e-05	0.999948	0.428019	26.3909	62.4802	-1.22425
ENSMUST00000004281.9	Dyrk2	5.59254e-05	0.999944	1.0991	3628.91	3301.68	0.136326
ENSMUST00000144534.7	Ing3	5.68698e-05	0.999943	2.32056	58.8644	25.0164	1.21448
ENSMUST00000219895.1	Kif3c	5.88403e-05	0.999941	1.65269	221.818	133.974	0.724812
ENSMUST00000106989.2	Mapt	6.16257e-05	0.999938	2.95643	287.866	96.9625	1.56386
ENSMUST00000095753.8	Tia1	6.26932e-05	0.999937	1.24332	1726.51	1388.51	0.314196
ENSMUST00000094361.10	Hsp90aa1	6.50979e-05	0.999935	1.08662	20679	19030.5	0.11985
ENSMUST00000165394.8	Ube2m	6.56945e-05	0.999934	1.37355	578.068	420.69	0.457909
ENSMUST00000097877.8	Zscan20	6.58066e-05	0.999934	1.33418	375.529	281.313	0.415958
ENSMUST00000066984.13	Gtf2h2	6.60654e-05	0.999934	0.713038	300.925	422.279	-0.487949
ENSMUST00000137293.7	Usp45	6.63483e-05	0.999934	0.102904	36.162	356.778	-3.28064
ENSMUST00000164553.6	Myadm	7.54375e-05	0.999925	1.33256	2815.3	2112.54	0.414203
ENSMUST00000116629.8	Arid5a	7.75181e-05	0.999922	1.53924	316.003	205.082	0.622221
ENSMUST00000035836.13	Inppl1	7.88527e-05	0.999921	1.99474	171.202	85.52	0.996203
ENSMUST00000079252.12	Ipmk	8.44085e-05	0.999916	1.13504	2459.5	2166.85	0.18274
ENSMUST00000125202.1	Top3b	8.53498e-05	0.999915	0.197595	3.22591	18.8234	-2.33938
ENSMUST00000165212.7	Sorbs1	8.54632e-05	0.999915	0.333271	22.4569	68.6135	-1.58523
ENSMUST00000056136.3	Kcnj10	8.59324e-05	0.999914	1.16425	11389.3	9782.5	0.219404
ENSMUST00000176013.7	Stx5a	8.59543e-05	0.999914	1.93961	125.824	64.5729	0.955766
ENSMUST00000225069.1	Tmem161b	8.97798e-05	0.99991	0.761525	362.349	476.013	-0.393037
ENSMUST00000022322.16	Glud1	9.00552e-05	0.99991	1.06536	11782.9	11060	0.0913454
ENSMUST00000099157.3	Nab2	9.10957e-05	0.999909	1.44724	584.966	404.004	0.533303
ENSMUST00000200271.4	Ttc14	9.14965e-05	0.999909	0.252836	34.9302	139.971	-1.98373
ENSMUST00000106860.5	Trim33	0.000105543	0.999894	1.49469	738.079	493.598	0.579842
ENSMUST00000100755.3	Unc119	0.000114338	0.999886	2.11225	198.671	93.7329	1.07878
ENSMUST00000161051.7	Eif4g2	0.000114885	0.999885	1.05936	18050.3	17038.8	0.0831902
ENSMUST00000212971.1	Fuk	0.000123686	0.999876	1.82232	299.224	163.921	0.865779
ENSMUST00000178987.2	1500002C15Rik	0.000126919	0.999873	0.556909	80.8919	145.741	-0.844487
ENSMUST00000181906.2	Cep83os	0.000129639	0.99987	0.883034	1480.46	1676.61	-0.17946
ENSMUST00000004892.6	Rab11a	0.000133289	0.999867	2.44812	191.155	77.7187	1.29167
ENSMUST00000114516.7	Dzip3	0.000134448	0.999866	1.5599	297.453	190.467	0.641449
ENSMUST00000049126.12	Dner	0.000134524	0.999865	0.935869	6937.05	7412.44	-0.0956216
ENSMUST00000107266.7	Pogz	0.000135559	0.999864	0.699695	414.311	592.395	-0.515203
ENSMUST00000156752.1	Zfr	0.000135774	0.999864	1.6371	262.109	159.867	0.71114
ENSMUST00000202520.3	Slc5a6	0.000140543	0.999859	3.18886	322.781	100.799	1.67304
ENSMUST00000004987.15	Srpk1	0.000145647	0.999854	0.631114	169.543	269	-0.664027
ENSMUST00000219962.1	Txnrd1	0.00014908	0.999851	1.37239	628.406	457.727	0.456685
ENSMUST00000129860.1	Msl3	0.00014989	0.99985	0.538436	64.0753	119.53	-0.893152
ENSMUST00000115021.7	Cald1	0.000154086	0.999846	1.28598	1431.38	1112.92	0.362873
ENSMUST00000191463.1	Cipc	0.000177101	0.999823	4.15103	32.2532	7.30307	2.05347
ENSMUST00000206399.1	4931406P16Rik	0.000180973	0.999819	1.47289	383.112	259.911	0.558649
ENSMUST00000209350.1	Tmem143	0.000182585	0.999817	0.657156	193.288	294.449	-0.605693
ENSMUST00000135570.7	Psma1	0.000187175	0.999813	7.96085	27.124	2.8694	2.99292
ENSMUST00000073556.11	Mdga1	0.00019108	0.999809	1.34153	1854.4	1382.14	0.423884
ENSMUST00000168574.8	Pid1	0.000191133	0.999809	0.871757	1410.74	1618.33	-0.198003
ENSMUST00000097360.2	Pacsin1	0.000192011	0.999808	0.859537	1084.29	1261.59	-0.218369
ENSMUST00000174160.2	Mtmr12	0.000197154	0.999803	1.18144	1144.1	968.296	0.240546
ENSMUST00000192548.5	Eif5b	0.000200987	0.999799	1.19295	1114.16	933.9	0.254535
ENSMUST00000022906.7	Fzd6	0.000201392	0.999799	0.702823	330.009	469.807	-0.508767
ENSMUST00000097999.8	Fam53b	0.000204319	0.999796	1.52361	614.047	402.809	0.607496
ENSMUST00000112257.9	Piga	0.000217284	0.999783	0.577172	92.1752	160.152	-0.792928
ENSMUST00000223703.1	Epb41l3	0.000219155	0.999781	0.86568	1853.02	2140.63	-0.208095
ENSMUST00000111050.9	Bdnf	0.000219501	0.99978	1.53384	552.001	359.666	0.617152
ENSMUST00000212845.1	Mau2	0.000240609	0.999759	0.781992	608.921	778.85	-0.354774
ENSMUST00000119603.1	Stambpl1	0.000287434	0.999713	0.699705	216.931	310.297	-0.515182
ENSMUST00000033699.12	Flna	0.000298686	0.999701	1.26632	4794.64	3786.14	0.340643
ENSMUST00000135890.7	Trp53bp1	0.000305662	0.999694	0.701609	180.475	257.492	-0.51126
ENSMUST00000135631.1	Nudcd3	0.000314	0.999686	0.666622	343.378	515.409	-0.58506
ENSMUST00000128257.7	Rnf44	0.000333655	0.999666	1.90355	79.1282	41.2769	0.928691
ENSMUST00000106442.8	Arhgap17	0.000333838	0.999666	1.39766	442.405	316.358	0.483013
ENSMUST00000112426.7	Pus1	0.00035659	0.999643	0.652192	103.686	159.309	-0.616632
ENSMUST00000099149.9	Nnt	0.000371474	0.999629	4.53008	425.503	93.449	2.17954
ENSMUST00000135341.7	Il15ra	0.0003846	0.999615	3.64535	25.3254	6.50099	1.86606
ENSMUST00000017561.14	Plxdc1	0.000400546	0.999599	0.698784	584.549	836.789	-0.517082
ENSMUST00000033265.4	Zranb1	0.000410172	0.99959	23.6032	112.264	4.16732	4.56091
ENSMUST00000111872.8	Arpp21	0.000418333	0.999582	0.241478	48.197	201.524	-2.05004
ENSMUST00000150440.7	Zfp326	0.000427249	0.999573	1.89953	168.927	88.6399	0.92564
ENSMUST00000140313.7	Zfp40	0.000435208	0.999565	1.73846	130.063	74.5536	0.797812
ENSMUST00000206301.1	Man2a2	0.000455064	0.999545	0.730449	292.283	400.369	-0.453145
ENSMUST00000117236.7	Dcaf11	0.000481503	0.999518	0.700351	360.033	514.338	-0.513851
ENSMUST00000107200.7	Cdc42se1	0.000493473	0.999507	5.28852	19.1164	3.11598	2.40286
ENSMUST00000054956.14	Stambpl1	0.000509001	0.999491	1.40383	484.047	344.627	0.489371
ENSMUST00000052012.13	Phka1	0.000515554	0.999484	0.852991	1319.81	1547.38	-0.229397
ENSMUST00000135988.7	Desi1	0.000527036	0.999473	1.88645	161.835	85.4991	0.915677
ENSMUST00000155649.7	Rnf168	0.000566827	0.999433	12.2136	47.1182	3.29319	3.61041
ENSMUST00000107208.7	Nbr1	0.000580979	0.999419	0.595741	309.129	519.317	-0.747244
ENSMUST00000033136.8	Bag3	0.00058969	0.99941	1.35809	557.281	410.259	0.441582
ENSMUST00000165489.7	Npepps	0.000590109	0.99941	1.29771	580.957	447.537	0.375971
ENSMUST00000167856.7	Myo18a	0.000618655	0.999381	0.412362	624.926	1516.36	-1.27802
ENSMUST00000030456.13	Nasp	0.000624386	0.999376	1.46463	155.311	105.932	0.550533
ENSMUST00000161317.1	Cul2	0.00062693	0.999373	2.46388	131.661	53.071	1.30093
ENSMUST00000114015.7	Map2	0.000666197	0.999334	5.40419	98.7748	17.7762	2.43408
ENSMUST00000211406.1	Cars2	0.000673139	0.999327	6.00848	50.3158	7.86146	2.587
ENSMUST00000228371.1	Hsf1	0.000686605	0.999313	0.143305	25.9908	185.044	-2.80284
ENSMUST00000053042.5	Zbtb8b	0.000712711	0.999287	0.188682	47.3138	253.404	-2.40597
ENSMUST00000031445.4	Aacs	0.000744002	0.999256	1.12778	3028.75	2685.54	0.17349
ENSMUST00000120094.4	Rpl9	0.000766062	0.999234	3.16942	99.3488	30.9251	1.66422
ENSMUST00000043169.13	Arel1	0.000768735	0.999231	0.945103	8111.04	8582.21	-0.0814564
ENSMUST00000030588.12	Phc2	0.000769317	0.999231	1.78352	916.22	513.445	0.834725
ENSMUST00000137246.7	Dnaja1	0.000774815	0.999225	1.17921	2295.02	1946.15	0.237815
ENSMUST00000022235.5	Htr1a	0.000837829	0.999162	0.880309	1680.3	1908.8	-0.183919
ENSMUST00000051389.9	Synm	0.000884276	0.999116	0.827431	1558.61	1883.8	-0.273289
ENSMUST00000172444.1	Rab11a	0.000884344	0.999116	8.81396	39.2211	3.90464	3.13979
ENSMUST00000108346.4	Ythdf3	0.000894741	0.999105	0.63582	408.432	642.723	-0.653309
ENSMUST00000191290.2	Snap91	0.00091532	0.999085	47.207	28.4183	0	5.56093
ENSMUST00000209812.1	Rpl13a	0.00100872	0.998991	0.757874	801.05	1057.17	-0.39997
ENSMUST00000148219.8	Drap1	0.00106036	0.99894	0.549923	190.222	346.411	-0.862698
ENSMUST00000156726.1	Nek6	0.00108751	0.998912	2.98473	31.5489	10.1612	1.5776
ENSMUST00000223949.1	Parp8	0.00110391	0.998896	1.76486	951.841	539.064	0.819551
ENSMUST00000061522.7	Dnd1	0.00111098	0.998889	2.28079	61.1413	26.4617	1.18953
ENSMUST00000090443.9	Camk2b	0.00111857	0.998881	0.648072	101.567	157.055	-0.625774
ENSMUST00000152480.1	Dpy19l1	0.0011331	0.998867	0.603144	122.107	202.855	-0.729427
ENSMUST00000103071.3	Gh	0.00113408	0.998866	0.342001	8.70868	26.06	-1.54793
ENSMUST00000135293.1	Fscn1	0.00122221	0.998778	0.189854	3.05475	18.7144	-2.39704
ENSMUST00000025463.13	Gm16286	0.001226	0.998774	0.489779	131.676	269.488	-1.0298
ENSMUST00000043151.11	Map7d2	0.00123724	0.998763	0.586879	514.947	877.865	-0.768864
ENSMUST00000127856.1	Thap7	0.0012661	0.998734	0.290921	7.39858	26.9306	-1.7813
ENSMUST00000085909.8	Cadm1	0.0013098	0.99869	0.774387	712.849	920.712	-0.368873
ENSMUST00000105861.7	Srrm1	0.00134663	0.998653	1.14136	3119.43	2733	0.190757
ENSMUST00000031249.7	Sparcl1	0.0013733	0.998627	1.15804	99804.7	86184.4	0.211679
ENSMUST00000138388.1	Cpne9	0.00137477	0.998625	0.137094	2.26998	20.4289	-2.86676
ENSMUST00000208966.1	Ikzf5	0.0014674	0.998533	1.50528	161.824	107.388	0.590028
ENSMUST00000084170.11	Phactr4	0.00152498	0.998475	1.40917	521.649	370.002	0.494848
ENSMUST00000201202.3	Babam2	0.00156482	0.998435	0.325972	17.8234	55.9494	-1.61718
ENSMUST00000039994.13	Cep250	0.00163463	0.998365	2.13196	739.033	346.319	1.09218
ENSMUST00000176384.7	Asap1	0.00164456	0.998355	0.873469	1288.78	1475.57	-0.195172
ENSMUST00000114653.1	Fmr1	0.00164638	0.998354	1.21459	661.421	544.453	0.280473
ENSMUST00000110065.7	Gpr68	0.00164736	0.998353	0.492223	104.47	212.875	-1.02262
ENSMUST00000109578.7	Vps54	0.00165256	0.998347	0.764982	724.231	946.917	-0.386501
ENSMUST00000147441.7	Cdk12	0.00165996	0.99834	0.758875	292.931	386.117	-0.398066
ENSMUST00000125924.1	Fam120c	0.00176022	0.99824	1.61805	189.996	117.188	0.694256
ENSMUST00000212675.1	Iws1	0.00181739	0.998183	3.02916	139.544	45.6548	1.59892
ENSMUST00000111560.9	Sec22c	0.0018403	0.99816	1.40695	257.999	183.197	0.492574
ENSMUST00000170209.7	Mms19	0.00188563	0.998114	1.39311	260.901	187.106	0.478311
ENSMUST00000064595.14	Asap2	0.00201643	0.997984	0.790244	976.082	1235.33	-0.339629
ENSMUST00000156429.7	Nudt3	0.0020369	0.997963	3.79507	48.8264	12.4128	1.92412
ENSMUST00000151177.1	Pcf11	0.00203812	0.997962	1.26634	544.146	429.57	0.340664
ENSMUST00000211517.1	Tmco3	0.00219457	0.997805	4.94399	27.509	5.0735	2.30567
ENSMUST00000160307.8	Tnik	0.00219869	0.997801	1.35316	1480.12	1093.66	0.436335
ENSMUST00000174050.7	Dnm2	0.00227684	0.997723	0.680919	292.802	430.298	-0.554444
ENSMUST00000169744.7	Adipor2	0.00232524	0.997675	1.30101	548.976	421.82	0.379628
ENSMUST00000001561.11	Nrip2	0.00235257	0.997647	0.85078	859.895	1010.82	-0.233141
ENSMUST00000124606.2	Gm11549	0.00238506	0.997615	0.625498	233.065	372.792	-0.676924
ENSMUST00000163398.7	Mms19	0.00254399	0.997456	0.673099	427.833	635.915	-0.57111
ENSMUST00000107855.1	Glipr2	0.00261822	0.997382	3.38031	35.213	9.98402	1.75716
ENSMUST00000156690.7	Mef2a	0.00263977	0.99736	0.945431	8120.3	8589.03	-0.0809564
ENSMUST00000128930.7	Mllt3	0.00265383	0.997346	3.90952	74.195	18.5203	1.96699
ENSMUST00000098190.9	Rragd	0.00268952	0.99731	1.1059	3465.24	3133.34	0.145227
ENSMUST00000216755.1	Cryab	0.00268966	0.99731	1.32558	1596.84	1204.48	0.406629
ENSMUST00000226644.1	Trio	0.00275506	0.997245	0.887118	3934.7	4435.45	-0.172802
ENSMUST00000227999.1	Trio	0.00305354	0.996946	0.89064	2531.63	2842.56	-0.167085
ENSMUST00000169628.7	Nisch	0.00306187	0.996938	0.648972	161.077	248.537	-0.623772
ENSMUST00000081606.6	P3h1	0.0030718	0.996928	2.96274	158.886	53.2204	1.56693
ENSMUST00000079160.7	Letm2	0.00311995	0.99688	0.733618	207.099	282.521	-0.4469
ENSMUST00000190121.6	Matr3	0.00315341	0.996847	0.938195	10576.7	11273.5	-0.0920404
ENSMUST00000205440.1	Sh2b1	0.00316344	0.996837	2.48232	234.448	94.08	1.31169
ENSMUST00000149085.7	Fastk	0.00318642	0.996814	0.860397	1360.79	1581.68	-0.216926
ENSMUST00000102748.10	43531	0.00320574	0.996794	0.858853	1616.73	1882.54	-0.219518
ENSMUST00000106233.1	Baiap2	0.00324358	0.996756	1.98586	293.797	147.639	0.989766
ENSMUST00000181595.1	Gm26649	0.00328672	0.996713	0.646859	297.045	459.381	-0.628476
ENSMUST00000194589.1	Flvcr1	0.00333345	0.996667	1.87842	83.1342	43.9699	0.909521
ENSMUST00000222197.1	Nol8	0.00341397	0.996586	1.43353	451.865	315.026	0.519569
ENSMUST00000097992.9	Focad	0.00342346	0.996577	1.12739	2716.75	2409.71	0.172982
ENSMUST00000115562.8	Zfp426	0.00343095	0.996569	1.39285	475.169	340.975	0.478043
ENSMUST00000028689.3	Lrp4	0.00345437	0.996546	1.12667	3334.53	2959.61	0.172059
ENSMUST00000128372.7	Ahsa2	0.00348393	0.996516	0.396344	171.976	434.842	-1.33518
ENSMUST00000154784.7	Orc4	0.00397884	0.996021	1.89232	121.11	63.7111	0.920154
ENSMUST00000063192.14	Tmem150c	0.00403893	0.995961	0.901049	3343.18	3710.35	-0.150323
ENSMUST00000072481.11	Sgip1	0.00405289	0.995947	0.495498	354.647	716.365	-1.01305
ENSMUST00000162899.7	Lypd1	0.00409915	0.995901	1.26116	626.302	496.478	0.334756
ENSMUST00000191081.6	Mag	0.00412237	0.995878	0.56982	1177.09	2066.19	-0.811422
ENSMUST00000112633.2	Kcnj3	0.00422267	0.995777	1.25728	621.698	494.354	0.330302
ENSMUST00000194418.1	Pcdhga4	0.00437555	0.995624	0.820825	1125.18	1370.92	-0.284854
ENSMUST00000114952.7	Galnt11	0.00441685	0.995583	0.332784	236.241	711.128	-1.58734
ENSMUST00000084264.11	Txlna	0.00462541	0.995375	1.67899	509.823	303.401	0.747591
ENSMUST00000123599.7	Auh	0.00465204	0.995348	2.74095	119.51	43.2111	1.45467
ENSMUST00000113310.8	Slc25a25	0.00469634	0.995304	1.25926	1847.71	1467.17	0.332576
ENSMUST00000076454.7	Ubqln1	0.00470512	0.995295	1.13601	4954.49	4361.23	0.183979
ENSMUST00000171155.3	Klhl25	0.00478008	0.99522	1.80248	560.284	310.567	0.849982
ENSMUST00000037011.4	Trim36	0.0047844	0.995216	11.0146	105.375	9.00767	3.46134
ENSMUST00000138119.1	Kmt2a	0.00498016	0.99502	4.36322	158.698	35.8976	2.12539
ENSMUST00000200821.1	Ociad2	0.00499393	0.995006	6.53757	11.3525	1.44335	2.70876
ENSMUST00000125774.1	Arl8a	0.00504775	0.994952	0.1941	74.7393	387.61	-2.36513
ENSMUST00000034863.7	Csk	0.00506655	0.994933	1.34574	559.442	415.555	0.428401
ENSMUST00000167211.8	Pax6	0.00507635	0.994924	3.69644	63.7739	16.8042	1.88614
ENSMUST00000160352.7	Tmem33	0.005166	0.994834	0.806964	629.814	780.62	-0.309423
ENSMUST00000075856.10	Kdm2a	0.00517768	0.994822	1.11453	5615.35	5038.25	0.156434
ENSMUST00000208226.1	Smarca2	0.00520651	0.994793	0.329011	16.0052	49.9009	-1.60379
ENSMUST00000084616.2	Anks6	0.00522893	0.994771	1.42633	317.339	222.303	0.512306
ENSMUST00000194558.5	Kpna4	0.00530993	0.99469	1.08968	3880.77	3561.32	0.123908
ENSMUST00000039564.10	Plppr5	0.00540302	0.994597	1.15385	1476.36	1279.43	0.206451
ENSMUST00000143444.7	Rangrf	0.0054424	0.994558	0.280652	7.73412	29.1341	-1.83314
ENSMUST00000026156.7	Rfng	0.00544705	0.994553	0.893462	2362.55	2644.34	-0.162522
ENSMUST00000155613.1	Aldh18a1	0.00548532	0.994515	0.167014	1.9533	14.7629	-2.58196
ENSMUST00000117242.7	Golim4	0.00562885	0.994371	1.27264	1104.37	867.648	0.347819
ENSMUST00000069098.6	Soga1	0.00566516	0.994335	1.16472	2615.16	2245.26	0.219989
ENSMUST00000224182.1	Hnrnpk	0.00570416	0.994296	1.17028	4540.82	3880.02	0.226856
ENSMUST00000152805.1	Add1	0.00586666	0.994133	0.553292	164.578	297.949	-0.853887
ENSMUST00000109488.7	Snhg11	0.00608428	0.993916	0.947747	130286	137470	-0.0774263
ENSMUST00000151933.1	Zfp606	0.00616828	0.993832	0.451484	49.1855	109.689	-1.14725
ENSMUST00000057258.10	Zfp518b	0.00617794	0.993822	2.06502	561.005	271.354	1.04615
ENSMUST00000129857.7	Vps39	0.00626419	0.993736	2.07484	295.428	142.067	1.053
ENSMUST00000010941.5	Wnt2	0.00631371	0.993686	0.746251	224.358	300.752	-0.422268
ENSMUST00000073149.6	Slc9a5	0.00651583	0.993484	0.816834	554.886	679.391	-0.291886
ENSMUST00000121094.7	Adar	0.00655953	0.99344	0.341305	45.8865	135.631	-1.55087
ENSMUST00000039013.14	Abca3	0.00672404	0.993276	0.813383	1421.85	1748.21	-0.297993
ENSMUST00000152667.1	Cdip1	0.00672644	0.993274	23.7704	31.9888	0.756595	4.57109
ENSMUST00000161519.7	Zfp248	0.00677745	0.993223	3.33064	160.05	47.6234	1.7358
ENSMUST00000132329.7	Nfrkb	0.00678432	0.993216	1.32196	790.673	597.955	0.402683
ENSMUST00000120595.7	Eml2	0.00682245	0.993178	0.866677	4727.09	5454.37	-0.206433
ENSMUST00000153843.7	Cfap100	0.00704322	0.992957	0.660369	102.868	155.951	-0.598656
ENSMUST00000159829.1	Cldnd1	0.00706745	0.992933	0.58583	56.7915	97.3768	-0.771446
ENSMUST00000150019.7	Dcaf11	0.00714168	0.992858	1.92828	341.195	176.646	0.947317
ENSMUST00000226528.1	Ndrg2	0.00715514	0.992845	0.141375	2.62808	22.3248	-2.8224
ENSMUST00000132947.1	Pds5b	0.00739511	0.992605	0.807533	1597.45	1978.34	-0.308407
ENSMUST00000116259.4	Map7	0.00772658	0.992273	0.896901	4347.73	4847.58	-0.156979
ENSMUST00000053239.2	Sstr3	0.0077785	0.992221	0.90892	2030.64	2234.16	-0.137775
ENSMUST00000090541.11	Atp5g1	0.00826051	0.991739	1.12217	2313.72	2061.77	0.16629
ENSMUST00000122051.1	Znf41-ps	0.00831084	0.991689	0.621271	80.3331	129.679	-0.686706
ENSMUST00000106988.7	Mapt	0.00840325	0.991597	2.63175	131.446	49.5649	1.39602
ENSMUST00000227651.1	AC112142.1	0.00840814	0.991592	0.635911	63.516	100.08	-0.653104
ENSMUST00000210120.1	Dbp	0.00846643	0.991534	0.701402	146.009	208.429	-0.511687
ENSMUST00000020488.8	D10Wsu102e	0.00880398	0.991196	1.09358	2268.64	2074.48	0.129053
ENSMUST00000097453.8	Cdc42bpa	0.00895145	0.991049	1.97265	128.349	64.7611	0.980135
ENSMUST00000151273.7	Gnptab	0.00913895	0.990861	5.51219	122.811	21.7765	2.46263
ENSMUST00000206581.1	Uri1	0.0091427	0.990857	5.55027	183.119	32.4886	2.47256
ENSMUST00000177974.7	Atp2a2	0.00928087	0.990719	2.21542	3253.98	1468.45	1.14758
ENSMUST00000187040.6	Srcap	0.00935505	0.990645	0.921741	5905.08	6406.49	-0.117566
ENSMUST00000215050.1	Dpagt1	0.00947461	0.990525	0.389229	27.2327	70.931	-1.36131
ENSMUST00000112272.1	Wnt5a	0.0102239	0.989776	0.702744	232.565	331.199	-0.508929
ENSMUST00000198585.1	Gm10419	0.0102638	0.989736	0.873476	1772.64	2029.46	-0.19516
ENSMUST00000100206.2	Larp4	0.0103136	0.989686	1.15588	2222.97	1923.1	0.208992
ENSMUST00000223060.1	Lpcat1	0.0103512	0.989649	0.713291	210.847	295.844	-0.487437
ENSMUST00000099166.9	Ddx4	0.0103935	0.989607	1.7768	227.041	127.512	0.829284
ENSMUST00000187836.6	Dnpep	0.0105033	0.989497	1.62447	110.232	67.6207	0.699972
ENSMUST00000176633.1	Traf7	0.0105967	0.989403	0.69524	113.856	163.917	-0.524418
ENSMUST00000144859.3	Selenof	0.0108206	0.989179	1.18365	1281.61	1082.66	0.243245
ENSMUST00000227242.1	Hnrnpc	0.0108267	0.989173	0.404658	187.862	465.154	-1.30522
ENSMUST00000105371.8	Stk11	0.0110667	0.988933	0.674997	151.131	224.195	-0.567046
ENSMUST00000219939.1	Nrcam	0.0110815	0.988919	1.8512	119.47	64.2539	0.888458
ENSMUST00000113011.8	Rbm41	0.0112086	0.988791	1.53828	205.582	133.429	0.621318
ENSMUST00000156872.1	Trim26	0.011315	0.988685	0.337887	59.4524	177.159	-1.56539
ENSMUST00000148711.1	Ptpn12	0.0113848	0.988615	0.158162	5.22941	36.3371	-2.66053
ENSMUST00000156721.7	Gria3	0.0114446	0.988555	1.48766	198.708	133.369	0.573045
ENSMUST00000189929.1	2810407A14Rik	0.0118293	0.988171	0.512022	39.453	77.3486	-0.965723
ENSMUST00000123958.7	Trappc11	0.0119034	0.988097	2.80426	82.5926	29.0568	1.48762
ENSMUST00000211392.1	Zscan18	0.0119112	0.988089	1.25685	952.742	757.915	0.329812
ENSMUST00000055673.1	Kcns3	0.0121398	0.98786	2.34264	84.3515	35.6546	1.22813
ENSMUST00000128260.8	Ramp2	0.0121784	0.987822	0.647947	108.573	167.9	-0.626052
ENSMUST00000079282.7	St5	0.0123073	0.987693	1.16798	1010.75	865.3	0.224013
ENSMUST00000214896.1	Rnf146	0.0124294	0.987571	1.74637	93.1453	53.0736	0.80436
ENSMUST00000174122.1	Nudt12	0.0124641	0.987536	2.76322	27.3532	9.50658	1.46635
ENSMUST00000143017.7	Nat10	0.0126367	0.987363	1.61777	507.13	313.24	0.694006
ENSMUST00000140053.2	Psmc4	0.0129421	0.987058	0.341514	16.971	50.8793	-1.54998
ENSMUST00000200708.1	Tpcn1	0.0132183	0.986782	2.87922	30.2076	10.0902	1.52568
ENSMUST00000020928.12	Arsg	0.0132851	0.986715	3.63102	287.46	78.7222	1.86037
ENSMUST00000100130.9	Slc16a3	0.0133	0.9867	3.32568	64.8636	19.0738	1.73365
ENSMUST00000113732.1	Bcs1l	0.0133719	0.986628	1.90173	90.547	47.3213	0.927315
ENSMUST00000132419.1	Kdm2b	0.0136352	0.986365	6.28221	14.4709	1.78634	2.65127
ENSMUST00000148344.7	Phldb1	0.0136461	0.986354	2.31679	897.582	387.076	1.21213
ENSMUST00000117269.7	Traf3	0.0142689	0.985731	2.52169	246.194	97.2594	1.33439
ENSMUST00000155276.2	Fasn	0.0144096	0.98559	0.692842	251.691	363.546	-0.529401
ENSMUST00000092849.11	Lig3	0.0144201	0.98558	2.83767	132.432	46.2709	1.5047
ENSMUST00000148189.1	Coro1b	0.0145308	0.985469	0.658137	86.1841	131.271	-0.603539
ENSMUST00000144603.5	Slc15a4	0.0145818	0.985418	5.58635	25.9273	4.13626	2.4819
ENSMUST00000181904.2	Cxxc4	0.0148541	0.985146	0.869326	851.937	980.05	-0.202032
ENSMUST00000172568.7	L3mbtl2	0.0150339	0.984966	3.24018	130.13	39.7361	1.69607
ENSMUST00000220858.1	Vipas39	0.0150378	0.984962	0.575015	137.744	240.003	-0.798328
ENSMUST00000114297.4	Vopp1	0.0154171	0.984583	0.908522	3514.11	3867.97	-0.138407
ENSMUST00000170117.7	Smpd4	0.0157878	0.984212	0.342115	74.3705	218.567	-1.54745
ENSMUST00000220032.1	Prdm4	0.0158428	0.984157	2.12883	163.962	76.6934	1.09006
ENSMUST00000202272.3	Senp7	0.0163346	0.983665	1.43817	200.787	139.507	0.524239
ENSMUST00000226056.1	Riok1	0.0164175	0.983583	0.593952	53.9368	91.2306	-0.751583
ENSMUST00000003777.4	Taf6l	0.0171156	0.982884	0.216529	20.3222	96.0796	-2.20737
ENSMUST00000211532.1	Gm45632	0.0173626	0.982637	1.50565	113.26	75.1192	0.590391
ENSMUST00000160359.1	Plod2	0.0173842	0.982616	1.48027	309.742	209.048	0.565859
ENSMUST00000071402.6	Elovl6	0.017501	0.982499	1.08805	3582.73	3292.78	0.121742
ENSMUST00000106676.7	Prkar1a	0.0175455	0.982455	1.41664	464.842	328.029	0.502469
ENSMUST00000110267.8	Sybu	0.0177031	0.982297	1.58337	1004.08	633.914	0.662998
ENSMUST00000105420.2	Adora2a	0.0179443	0.982056	0.638765	55.9841	87.8195	-0.646642
ENSMUST00000105251.8	R3hdm2	0.0180352	0.981965	0.825606	2578.3	3123.04	-0.276474
ENSMUST00000134993.2	Trim45	0.0185281	0.981472	2.97772	77.939	25.7656	1.57421
ENSMUST00000182212.2	Ank2	0.0185675	0.981432	1.59726	129.258	80.8091	0.675597
ENSMUST00000137497.7	Arhgap26	0.0185774	0.981423	0.839581	3158.55	3762.17	-0.252259
ENSMUST00000090602.5	Mdk	0.0187675	0.981232	4.11445	14.1279	2.96817	2.0407
ENSMUST00000069742.6	Prr18	0.0187708	0.981229	1.20395	997.031	828.028	0.267778
ENSMUST00000046948.9	Cables1	0.0189186	0.981081	0.554919	111.422	201.283	-0.84965
ENSMUST00000123002.1	Tia1	0.0193106	0.980689	0.5054	32.096	64.1081	-0.984502
ENSMUST00000160410.7	Adck5	0.0194849	0.980515	0.462269	25.64	56.181	-1.1132
ENSMUST00000065573.13	Gpatch2	0.0198123	0.980188	0.727189	521.106	716.834	-0.459599
ENSMUST00000211561.1	Stum	0.0203897	0.97961	2.44328	87.2155	35.3328	1.28882
ENSMUST00000102656.3	Foxo6	0.0206553	0.979345	1.18207	1382.84	1169.79	0.24132
ENSMUST00000100208.8	Fnbp1	0.0206821	0.979318	2.02356	146.8	72.2341	1.0169
ENSMUST00000189877.6	Lrfn1	0.0207471	0.979253	1.8241	92.4427	50.4006	0.867188
ENSMUST00000041627.13	Sdk2	0.02086	0.97914	0.79825	1391.71	1743.53	-0.325088
ENSMUST00000228747.1	Zfp219	0.0208835	0.979117	2.39105	34.4217	14.1948	1.25764
ENSMUST00000130201.7	Mrpl15	0.0210276	0.978972	1.59118	137.122	85.9478	0.6701
ENSMUST00000176731.2	Smarca2	0.0211095	0.97889	0.44102	83.9586	191.153	-1.18108
ENSMUST00000113620.9	Sh3glb2	0.0212562	0.978744	1.73756	426.644	245.281	0.797061
ENSMUST00000127664.1	Gm20388	0.0216263	0.978374	0.841753	1539.53	1829.08	-0.248532
ENSMUST00000071935.6	Myo9b	0.021707	0.978293	0.786047	977.538	1243.78	-0.347312
ENSMUST00000027083.6	Pth2r	0.02176	0.97824	0.454814	20.4932	45.4299	-1.13665
ENSMUST00000204424.1	Ipo8	0.0219376	0.978062	1.4102	167.485	118.588	0.495903
ENSMUST00000110395.10	Max	0.0227586	0.977241	1.18928	862.84	725.416	0.250089
ENSMUST00000112193.7	Parp11	0.0228967	0.977103	0.248644	10.2337	43.0167	-2.00785
ENSMUST00000145335.2	Nop56	0.0233518	0.976648	3.59902	21.7981	5.61254	1.84761
ENSMUST00000182010.1	Gm42418	0.0240147	0.975985	0.722482	1153.2	1596.29	-0.468967
ENSMUST00000117077.7	Slc7a2	0.0240419	0.975958	0.78984	1007.07	1275.2	-0.340368
ENSMUST00000128869.7	Mapk10	0.0242585	0.975741	0.565418	120.514	213.615	-0.822611
ENSMUST00000190666.1	Snhg14	0.0243888	0.975611	0.786965	324.433	412.343	-0.345629
ENSMUST00000160934.7	Tnik	0.0244432	0.975557	12.1971	284.092	22.7271	3.60847
ENSMUST00000030372.5	Col9a2	0.0245186	0.975481	0.710176	212.862	299.872	-0.493751
ENSMUST00000026887.13	Atp5c1	0.024535	0.975465	1.55111	1142.91	736.614	0.633304
ENSMUST00000130311.1	Ank1	0.0246245	0.975375	2.89318	33.4407	11.156	1.53266
ENSMUST00000131094.7	Ogfod2	0.0247183	0.975282	0.148895	2.65768	21.3649	-2.74764
ENSMUST00000218372.1	Ddx50	0.0255788	0.974421	1.60224	208.943	130.175	0.680094
ENSMUST00000201159.1	Gm42547	0.0268142	0.973186	1.259	588.517	467.384	0.332278
ENSMUST00000171807.7	Fam184a	0.0269963	0.973004	0.542505	46.7939	86.7739	-0.882292
ENSMUST00000212772.1	Slc9a5	0.0274007	0.972599	0.782161	562.692	719.504	-0.354462
ENSMUST00000190288.1	R3hdm1	0.0276036	0.972396	0.859539	1294.16	1505.7	-0.218366
ENSMUST00000176610.7	Taf6l	0.0277329	0.972267	1.32438	403.138	304.247	0.405314
ENSMUST00000150380.1	Radil	0.02781	0.97219	0.56307	32.1313	57.333	-0.828614
ENSMUST00000093201.12	Npm1	0.0278618	0.972138	0.220977	73.1531	333.213	-2.17803
ENSMUST00000196409.1	Atp11b	0.0279803	0.97202	0.801561	990.488	1235.85	-0.319115
ENSMUST00000219503.1	Pfn4	0.02801	0.97199	0.638241	56.927	89.3897	-0.647826
ENSMUST00000182226.7	Ppfia1	0.0284875	0.971513	1.44254	603.63	418.259	0.528616
ENSMUST00000105454.2	Col13a1	0.028538	0.971462	1.76617	57.1468	32.0896	0.820624
ENSMUST00000128715.7	Plekha2	0.0290611	0.970939	0.761244	372.943	490.106	-0.39357
ENSMUST00000125660.2	Guf1	0.0291957	0.970804	0.847724	1097.58	1294.8	-0.238333
ENSMUST00000097593.8	Arhgap26	0.0294756	0.970524	1.56555	567.864	362.504	0.646665
ENSMUST00000027800.14	Tmem63a	0.029548	0.970452	2.99481	966.927	322.458	1.58247
ENSMUST00000206400.1	Stambp	0.0297894	0.970211	0.579437	271.491	468.989	-0.787275
ENSMUST00000068581.8	Gja1	0.0298339	0.970166	1.06882	11610.4	10862.7	0.0960251
ENSMUST00000213717.1	Tyk2	0.0299041	0.970096	1.33997	271.036	202.115	0.422197
ENSMUST00000124569.7	Slc15a4	0.0308504	0.96915	1.74232	270.951	155.249	0.801014
ENSMUST00000119694.1	Ctsf	0.0311885	0.968811	0.919159	2578.01	2804.77	-0.121614
ENSMUST00000027123.14	Hspd1	0.0314097	0.96859	1.07288	8674.51	8085.2	0.101495
ENSMUST00000017188.13	Serpinb6a	0.0315776	0.968422	0.615577	60.3836	98.4767	-0.699989
ENSMUST00000113676.5	Slc30a9	0.0316375	0.968362	1.45684	210.515	144.308	0.542843
ENSMUST00000225710.1	Sorbs1	0.0317921	0.968208	1.81664	173.425	95.1885	0.861272
ENSMUST00000032459.13	Vgll4	0.0320211	0.967979	1.2724	398.911	313.379	0.347553
ENSMUST00000148276.2	Bicdl1	0.0321609	0.967839	1.20958	627.094	518.334	0.274502
ENSMUST00000154912.1	Dnajc10	0.0322121	0.967788	0.539949	24.5661	45.7919	-0.889104
ENSMUST00000203497.1	Cacng7	0.0332391	0.966761	1.36278	202.736	148.674	0.446554
ENSMUST00000111906.1	Kcnip2	0.0332427	0.966757	1.13849	3505.01	3078.58	0.187117
ENSMUST00000099304.3	Tasp1	0.0332839	0.966716	2.2851	89.349	38.7548	1.19226
ENSMUST00000106603.8	Elavl4	0.033553	0.966447	0.531278	115.595	218.122	-0.912462
ENSMUST00000111159.1	Akt3	0.0335786	0.966421	1.32295	2717.24	2053.78	0.403759
ENSMUST00000115830.7	Mapre2	0.0339814	0.966019	1.2271	1388.43	1131.36	0.295248
ENSMUST00000113042.2	Mum1l1	0.0340764	0.965924	4.65432	158.577	33.588	2.21857
ENSMUST00000169558.7	Zfp426	0.0342839	0.965716	0.546734	170.661	312.657	-0.87109
ENSMUST00000051923.6	Trp53rkb	0.0343697	0.96563	2.22445	40.647	17.9343	1.15345
ENSMUST00000217132.1	Ubl7	0.0344959	0.965504	1.59039	105.171	65.9007	0.669381
ENSMUST00000124331.7	Gm45902	0.0349054	0.965095	1.33828	239.2	178.649	0.420383
ENSMUST00000095171.4	Atp2c2	0.0354851	0.964515	0.63591	79.0049	124.417	-0.653106
ENSMUST00000067757.10	Pld1	0.0368911	0.963109	0.723414	222.065	307.203	-0.467106
ENSMUST00000179022.7	Lmnb2	0.0369206	0.963079	1.17278	1540.39	1313.36	0.229928
ENSMUST00000046212.1	Slc16a1	0.0373159	0.962684	1.12603	2002.69	1778.51	0.171243
ENSMUST00000080283.12	Synj2	0.0380409	0.961959	2.70688	428.023	157.736	1.43663
ENSMUST00000162099.7	Impdh1	0.0386462	0.961354	0.32221	28.7106	90.3989	-1.63393
ENSMUST00000165111.7	Acly	0.0387296	0.96127	1.62995	1545.71	948.081	0.704829
ENSMUST00000020529.12	Ahsa2	0.0388064	0.961194	1.22985	2319.47	1885.86	0.298487
ENSMUST00000179619.8	Adgrg1	0.0389558	0.961044	2.95212	91.0702	30.4424	1.56175
ENSMUST00000148681.2	Hp1bp3	0.0391423	0.960858	0.678287	120.421	177.829	-0.560032
ENSMUST00000131170.1	Psme3	0.0400026	0.959997	2.57743	28.0451	10.5046	1.36593
ENSMUST00000183448.7	Dmtf1	0.0400963	0.959904	0.69269	262.398	379.084	-0.529719
ENSMUST00000137343.7	Snhg12	0.0401685	0.959831	0.141305	5.11326	39.9235	-2.82312
ENSMUST00000126400.1	Dlx1	0.0403682	0.959632	0.414886	16.4355	40.4818	-1.26921
ENSMUST00000167386.7	Actb	0.0403731	0.959627	1.99617	101.967	50.7742	0.997234
ENSMUST00000156788.1	Taz	0.0410998	0.9589	0.300818	23.5267	79.6388	-1.73304
ENSMUST00000160835.8	Tmem55b	0.0417462	0.958254	1.50545	149.176	98.9744	0.590194
ENSMUST00000127492.1	Map6	0.042658	0.957342	1.13863	1450.23	1273.62	0.1873
ENSMUST00000102824.3	Ifit1	0.0428144	0.957186	1.49923	109.286	72.7912	0.584226
ENSMUST00000227478.1	Hsf1	0.0430502	0.95695	0.794244	953.423	1200.58	-0.332346
ENSMUST00000062213.11	Sfxn3	0.0431619	0.956838	0.941714	5552.75	5896.46	-0.0866392
ENSMUST00000037376.13	Nagk	0.0432932	0.956707	0.849232	647.04	762.021	-0.235769
ENSMUST00000161632.2	Coq8a	0.0435306	0.956469	2.73467	35.7378	12.6783	1.45137
ENSMUST00000128148.7	Cpne9	0.0443027	0.955697	9.84694	18.5713	1.33343	3.29968
ENSMUST00000140730.1	Ppp1r16a	0.0443101	0.95569	0.538506	87.9336	163.819	-0.892966
ENSMUST00000203609.2	Zfp746	0.0444252	0.955575	0.780199	850.449	1090.21	-0.358085
ENSMUST00000147183.1	Rbbp4	0.0445488	0.955451	1.69143	76.6219	45.1733	0.758247
ENSMUST00000148246.7	Eml2	0.0455307	0.954469	1.64853	417.278	252.879	0.721181
ENSMUST00000152361.1	Tnk2	0.0455517	0.954448	3.63264	64.8461	17.4053	1.86102
ENSMUST00000085206.10	Slc25a36	0.0463737	0.953626	1.13654	1209.32	1063.96	0.184652
ENSMUST00000143104.1	Alg2	0.0464438	0.953556	0.303919	5.09005	18.1567	-1.71824
ENSMUST00000027186.11	Trak2	0.0464725	0.953528	1.05532	10864	10294.5	0.0776776
ENSMUST00000224574.1	Cetn3	0.0465105	0.95349	0.264335	4.78244	19.0555	-1.91956
ENSMUST00000214065.1	Ppcdc	0.046685	0.953315	0.396334	13.4751	34.9361	-1.33521
ENSMUST00000091466.3	Ttc37	0.0473388	0.952661	4.44641	135.659	30.0331	2.15264
ENSMUST00000156489.7	Dph1	0.0477409	0.952259	1.59452	110.258	68.9185	0.673125
ENSMUST00000019503.13	Gdpd2	0.0478516	0.952148	1.39365	292.055	209.388	0.478865
ENSMUST00000101499.9	Cbll1	0.048251	0.951749	1.20241	898.698	747.313	0.265924
ENSMUST00000217624.1	6030419C18Rik	0.0488461	0.951154	0.791162	278.171	351.76	-0.337955
ENSMUST00000134936.8	Taz	0.0492312	0.950769	0.638353	87.5771	137.541	-0.647573
ENSMUST00000036043.4	Slitrk2	0.0494116	0.950588	1.33545	242.797	181.655	0.417326
