# Supplementary material for: Rbfox1 up-regulation impairs BDNF-dependent hippocampal LTP by dysregulating TrkB isoform expression levels
Source: eLife. 2019 Aug 20;8:e49673. doi: 10.7554/eLife.49673 (PMC6715404; doi:10.7554/eLife.49673)
Supplement: Supplementary file 2. [file elife-49673-supp2.xlsx]

## Sheet: N-cre-Fox1 vs RbFox1-KO 
transcriptID	geneID	FDR	PPDE	PostFC	C1Mean	C2Mean	logPostFC
ENSMUST00000224227.1	Sorbs1	0	1	0.30891	57.8889	188.694	-1.69474
ENSMUST00000115841.9	Rbfox1	0	1	0.294795	284.728	967.238	-1.76222
ENSMUST00000062957.7	Ttc7b	0	1	1.42048	3111.71	2190.43	0.506379
ENSMUST00000154650.7	Bcas1	0	1	0.618295	2815.8	4554.5	-0.693633
ENSMUST00000138052.7	Per3	2.12591e-11	1	0.52558	337.281	642.255	-0.928018
ENSMUST00000022699.9	Gfra2	6.65169e-11	1	0.74813	666.863	891.486	-0.418639
ENSMUST00000067137.13	Tprkb	7.26375e-11	1	0.792386	1509.95	1905.72	-0.335724
ENSMUST00000130256.2	B930095G15Rik	1.84645e-10	1	0.761214	1844.64	2423.39	-0.393627
ENSMUST00000052012.13	Phka1	2.12887e-10	1	0.78609	890.408	1132.86	-0.347233
ENSMUST00000097999.8	Fam53b	3.35391e-10	1	1.57732	417.939	264.756	0.657476
ENSMUST00000027186.11	Trak2	2.93134e-09	1	1.33646	8803.61	6587.18	0.418416
ENSMUST00000211392.1	Zscan18	5.38355e-09	1	0.53241	271.87	511.148	-0.90939
ENSMUST00000114050.7	Tmsb10	3.84246e-08	1	1.56059	2913.06	1866.43	0.642091
ENSMUST00000125660.2	Guf1	6.20851e-08	1	0.769916	819.554	1064.57	-0.377226
ENSMUST00000132918.7	Orc3	3.94086e-07	1	2.90261	95.3065	32.4548	1.53735
ENSMUST00000224954.1	Daam2	9.35355e-07	0.999999	0.823529	3407.59	4137.86	-0.280108
ENSMUST00000201452.3	Hsph1	1.02659e-06	0.999999	1.77121	139.25	78.3657	0.824739
ENSMUST00000160359.1	Plod2	1.53914e-06	0.999998	1.46642	325.515	221.794	0.552303
ENSMUST00000219033.1	Adamts4	3.00526e-06	0.999997	0.209708	134.151	641.885	-2.25354
ENSMUST00000097360.2	Pacsin1	1.51634e-05	0.999985	1.38815	1063.11	765.687	0.473161
ENSMUST00000116259.4	Map7	1.56481e-05	0.999984	0.740345	2009.54	2714.53	-0.433731
ENSMUST00000162899.7	Lypd1	2.62715e-05	0.999974	0.595026	541.326	910.146	-0.748975
ENSMUST00000062213.11	Sfxn3	5.23309e-05	0.999948	1.29251	4435.78	3431.78	0.370175
ENSMUST00000111140.2	Lmo2	8.37492e-05	0.999916	3.12646	86.5281	27.2818	1.64453
ENSMUST00000040912.8	Anln	0.000213301	0.999787	0.812625	898.913	1106.26	-0.299338
ENSMUST00000110065.7	Gpr68	0.000384605	0.999615	4.01563	350.495	86.8473	2.00563
ENSMUST00000051389.9	Synm	0.000515572	0.999484	0.60406	808.173	1338.28	-0.727235
ENSMUST00000077709.10	Tmem268	0.000540738	0.999459	1.75142	295.613	168.536	0.808525
ENSMUST00000111303.1	Dgkz	0.000931719	0.999068	1.7585	845.84	480.751	0.814346
ENSMUST00000032383.13	Sspn	0.00139327	0.998607	0.700032	308.928	441.554	-0.514507
ENSMUST00000114516.7	Dzip3	0.00234862	0.997651	1.40062	496.702	354.465	0.486064
ENSMUST00000200821.1	Ociad2	0.00235597	0.997644	3.32648	57.7885	17.1381	1.73399
ENSMUST00000119299.7	Ogt	0.0024027	0.997597	1.47505	371.226	251.484	0.560764
ENSMUST00000055676.3	S1pr1	0.00286391	0.997136	0.81829	2557.88	3125.95	-0.289316
ENSMUST00000128260.8	Ramp2	0.00487126	0.995129	0.397347	39.968	101.466	-1.33153
ENSMUST00000112426.7	Pus1	0.0100653	0.989935	0.566914	59.3084	105.059	-0.818799
ENSMUST00000041627.13	Sdk2	0.0117758	0.988224	1.24607	1022.53	820.538	0.31738
ENSMUST00000201202.3	Babam2	0.0138948	0.986105	4.35112	52.3095	11.5756	2.12139
ENSMUST00000069742.6	Prr18	0.0143197	0.98568	0.595959	293.682	493.182	-0.746714
ENSMUST00000219939.1	Nrcam	0.0145664	0.985434	0.46666	30.9979	67.0876	-1.09956
ENSMUST00000026585.13	Tspan4	0.0377043	0.962296	0.476531	14.5737	31.2197	-1.06936
ENSMUST00000179337.8	Anks1b	0.038999	0.961001	1.24589	411.689	330.324	0.317174

## Sheet: RbFox1-KO (Vuong et al., 2018)
transcriptID	geneID	FDR	PPDE	PostFC	C1Mean	C2Mean	logPostFC
ENSMUST00000030784.13	Prkag2	0	1	1.58527	3606.43	2274.84	0.664726
ENSMUST00000030986.14	Lrpap1	0	1	1.58468	8212.05	5182.03	0.664189
ENSMUST00000153664.1	Lrpap1	0	1	1.72512	1168.47	677.082	0.786699
ENSMUST00000147028.2	Lrpap1	0	1	1.64994	552.432	334.688	0.72241
ENSMUST00000114204.7	Ablim2	0	1	126.115	72.5259	0	6.9786
ENSMUST00000075304.13	Stx3	0	1	1.51715	1426.98	940.369	0.601366
ENSMUST00000056355.8	Nat8l	0	1	0.675188	6751.59	9999.72	-0.566639
ENSMUST00000001147.4	Col6a1	0	1	3.40236	5067.76	1489.27	1.76654
ENSMUST00000081654.12	Col18a1	0	1	4.33691	742.914	170.854	2.11667
ENSMUST00000133331.1	Cacna1g	0	1	2.50476	184.694	73.3891	1.32467
ENSMUST00000146160.1	Cacna1g	0	1	2.35848	357.419	151.212	1.23786
ENSMUST00000142190.1	Cacna1g	0	1	2.61266	236.993	90.5171	1.38552
ENSMUST00000133000.1	Cacna1g	0	1	2.89724	264.293	91.0182	1.53468
ENSMUST00000002412.8	Ncan	0	1	1.53264	10784.4	7036.36	0.616019
ENSMUST00000005256.12	Ndrg1	0	1	0.630336	2335	3704.56	-0.665806
ENSMUST00000106307.8	Hivep3	0	1	1.38906	3145.86	2264.64	0.47411
ENSMUST00000027795.13	Cnih3	0	1	1.53973	3496.46	2270.71	0.622679
ENSMUST00000025395.8	Grp	0	1	2.35023	1014.58	431.36	1.2328
ENSMUST00000107044.9	Plekhb1	0	1	0.705751	5459.35	7735.76	-0.50277
ENSMUST00000106110.9	Wdr45b	1.11022e-16	1	67.586	38.5981	0	6.07865
ENSMUST00000087164.9	Lcorl	0	1	0.2988	54.8788	185.024	-1.74275
ENSMUST00000050000.15	Stxbp1	0	1	1.23993	12652.4	10204.1	0.310253
ENSMUST00000224227.1	Sorbs1	0	1	0.30891	57.8889	188.694	-1.69474
ENSMUST00000209118.1	Prss23	0	1	10.1471	109.713	10.2897	3.343
ENSMUST00000031278.5	Bmp3	0	1	8.01851	1126.34	139.96	3.00333
ENSMUST00000099497.3	B3galt5	0	1	0.556412	1462.73	2629.32	-0.845774
ENSMUST00000109553.8	Tef	0	1	0.560186	3221.45	5751.13	-0.836022
ENSMUST00000164673.1	Tef	0	1	0.620596	320.42	516.501	-0.688274
ENSMUST00000046245.5	Zscan18	0	1	416.559	240.888	0	8.70238
ENSMUST00000026170.1	Ubtd1	0	1	1.84021	495.361	269.044	0.879872
ENSMUST00000103109.3	Cntnap1	0	1	0.745488	7145.88	9585.61	-0.423743
ENSMUST00000204542.2	Ntf3	0	1	0.281351	74.7033	266.997	-1.82956
ENSMUST00000119251.7	Mef2d	0	1	1.25293	1975.47	1576.56	0.325308
ENSMUST00000130942.7	Echdc2	0	1	0.495207	151.75	307.027	-1.0139
ENSMUST00000052281.5	Epop	0	1	0.42089	288.794	686.581	-1.24849
ENSMUST00000005470.4	Cadm3	0	1	1.25612	3703.63	2948.34	0.32898
ENSMUST00000166610.7	Rbfox2	0	1	1.22244	11400.2	9325.65	0.289767
ENSMUST00000040971.13	Capn5	0	1	0.63857	2035.63	3187.99	-0.647084
ENSMUST00000107166.7	Tenm4	0	1	1.45488	7251.23	4983.88	0.540903
ENSMUST00000036299.13	Camta2	0	1	0.699246	2063.53	2951.33	-0.516129
ENSMUST00000021614.13	Pfkp	0	1	1.41777	4544.43	3205.16	0.503624
ENSMUST00000133193.7	Mbp	0	1	0.654623	40578.5	61988	-0.611264
ENSMUST00000084125.9	Tardbp	0	1	0.882161	4949.42	5610.64	-0.180886
ENSMUST00000065793.11	Phgdh	0	1	0.782185	1667.57	2132.1	-0.354418
ENSMUST00000039928.6	Plekhh1	0	1	0.578712	392.192	678.12	-0.789083
ENSMUST00000123169.1	Trnp1	0	1	1.9317	2014.55	1042.61	0.949869
ENSMUST00000125541.1	Trnp1	0	1	2.01817	5111.79	2532.71	1.01305
ENSMUST00000105668.7	Camta1	0	1	0.586422	2290.11	3905.64	-0.76999
ENSMUST00000155990.7	Epb41	0	1	89.5905	51.6973	0.003838	6.48527
ENSMUST00000114115.8	Snapc4	0	1	0.0939171	88.2982	945.764	-3.41247
ENSMUST00000035427.10	Snapc4	0	1	5.94237	985.39	165.342	2.57104
ENSMUST00000108101.7	Dusp14	0	1	2.39615	574.805	239.549	1.26072
ENSMUST00000063661.12	Atp6v1a	0	1	1.39125	11015.5	7917.49	0.476385
ENSMUST00000084882.8	Crip2	0	1	1.43976	2597.95	1804.33	0.525824
ENSMUST00000105031.3	Klhdc7a	1.11022e-16	1	0.65618	447.749	682.521	-0.607838
ENSMUST00000114317.9	Grin1	0	1	0.339919	846.47	2491.34	-1.55674
ENSMUST00000155627.1	Grin1	0	1	0.401005	118.34	295.574	-1.31831
ENSMUST00000030538.4	Ddost	0	1	1.21687	3528.61	2899.7	0.283172
ENSMUST00000159329.7	Slc24a4	0	1	1.80226	1026.84	569.604	0.849806
ENSMUST00000159916.4	Prrt2	0	1	0.656462	6233.66	9496.15	-0.607217
ENSMUST00000124470.7	Prlr	0	1	6.32814	631.265	99.4927	2.66178
ENSMUST00000030651.8	Sh3bgrl3	0	1	1.50139	4222.85	2812.43	0.586303
ENSMUST00000103236.3	Evi2a	0	1	0.63008	486.4	772.306	-0.666392
ENSMUST00000129635.7	Lpin2	0	1	1.62194	5647.46	3481.8	0.697717
ENSMUST00000023829.6	Cdkn1a	0	1	1.68173	363.998	216.307	0.749943
ENSMUST00000112866.7	Cxcl12	0	1	0.415743	306.204	737.337	-1.26624
ENSMUST00000169449.7	Slc6a17	0	1	1.35581	22938.3	16918.4	0.439157
ENSMUST00000108281.7	Fbxo27	0	1	0.435456	151.884	349.544	-1.1994
ENSMUST00000021610.6	Chga	0	1	2.1151	9338.12	4414.82	1.08072
ENSMUST00000184063.2	Csmd2	0	1	1.73817	2981.69	1715.28	0.797566
ENSMUST00000015858.11	Cers2	0	1	0.775417	1481.94	1911.25	-0.366955
ENSMUST00000006435.7	Atp6v1b2	0	1	1.22737	24523.3	19980.3	0.295566
ENSMUST00000033575.6	Magee2	0	1	0.61082	289.91	474.824	-0.711181
ENSMUST00000004140.10	Gstm1	0	1	0.712691	5551.06	7789.11	-0.488651
ENSMUST00000000641.14	Sema4f	0	1	0.755368	1282.97	1698.58	-0.404748
ENSMUST00000175805.8	Zhx1	0	1	0.558148	306.747	550.039	-0.84128
ENSMUST00000188368.6	Apbb1	0	1	652.909	377.894	0	9.35074
ENSMUST00000094761.10	Stk40	0	1	1.92187	2064.11	1073.73	0.94251
ENSMUST00000042046.4	Scara3	0	1	0.707241	759.856	1074.52	-0.499726
ENSMUST00000101270.4	Tbc1d9b	0	1	0.771588	2569.48	3330.29	-0.374097
ENSMUST00000227349.1	AC121960.2	0	1	3.81264	112.634	29.3124	1.93079
ENSMUST00000145575.8	Egfl7	2.22045e-16	1	9.53743	77.0466	7.55944	3.2536
ENSMUST00000105379.2	Palm	0	1	1.16869	5905.09	5052.68	0.224887
ENSMUST00000136217.2	Gm13111	0	1	0.667139	426.08	638.823	-0.583942
ENSMUST00000110844.2	Kcnh1	0	1	1.59906	1080.27	675.345	0.677227
ENSMUST00000113500.7	Men1	0	1	133.602	76.8659	0	7.0618
ENSMUST00000014957.9	Stc1	0	1	0.21961	43.2017	197.828	-2.18699
ENSMUST00000037983.5	Ensa	0	1	1.29187	7582.39	5869.24	0.369462
ENSMUST00000221199.1	Csmd2	0	1	1.69462	1263.96	745.625	0.760966
ENSMUST00000066708.6	Dmp1	0	1	1.82404	347.838	190.556	0.867136
ENSMUST00000176383.2	Zfhx4	0	1	0.474227	219.153	462.77	-1.07635
ENSMUST00000086430.4	Col5a2	4.44089e-16	1	2.32198	911.976	392.581	1.21535
ENSMUST00000113085.1	Plp1	0	1	0.706525	15570.1	22037.8	-0.501187
ENSMUST00000033800.12	Plp1	0	1	0.678604	12064.3	17778.2	-0.559357
ENSMUST00000091967.11	Bin1	0	1	0.752175	1524.13	2026.49	-0.41086
ENSMUST00000150983.1	Ache	0	1	1.45896	837.04	573.618	0.544941
ENSMUST00000136088.7	Actl6b	0	1	69.7439	39.8489	0	6.12399
ENSMUST00000079063.6	Sox11	0	1	2.30475	1500.21	650.746	1.20461
ENSMUST00000044608.13	Jarid2	0	1	162.707	155.56	0.379962	7.34613
ENSMUST00000115841.9	Rbfox1	0	1	0.294795	284.728	967.238	-1.76222
ENSMUST00000056416.7	Rbfox1	0	1	0.332269	3258.99	9808.91	-1.58958
ENSMUST00000077119.7	Gjc3	0	1	0.702254	1113.5	1585.75	-0.509936
ENSMUST00000008537.8	Carhsp1	0	1	0.688463	973.069	1413.54	-0.53855
ENSMUST00000115816.2	Celf4	0	1	1.24527	14689.1	11795.8	0.316459
ENSMUST00000033495.14	Pim2	0	1	1.53769	2263.23	1471.72	0.620762
ENSMUST00000028883.11	Pdyn	0	1	0.33706	162.531	482.816	-1.56892
ENSMUST00000040010.9	Rbm3	0	1	133.584	76.8552	0	7.0616
ENSMUST00000171737.2	Odc1	0	1	1.5804	2462.96	1558.23	0.660291
ENSMUST00000076354.12	Tspan7	0	1	0.841543	24331.9	28913.6	-0.24889
ENSMUST00000036248.12	Pmepa1	0	1	2.39892	2088.93	870.597	1.26238
ENSMUST00000033313.2	Atp6ap2	0	1	1.15143	7462.87	6481.37	0.203423
ENSMUST00000053764.6	Foxo1	0	1	0.718069	1226.58	1708.29	-0.477806
ENSMUST00000146390.2	Sstr2	0	1	2.65835	1044.51	392.707	1.41053
ENSMUST00000062957.7	Ttc7b	0	1	1.42048	3111.71	2190.43	0.506379
ENSMUST00000026973.13	Prkar1b	0	1	1.25166	19039.9	15211.5	0.323848
ENSMUST00000037923.4	Rbm24	0	1	0.519889	324.192	623.868	-0.943724
ENSMUST00000022057.8	Tppp	0	1	0.831874	18143.5	21810.4	-0.265563
ENSMUST00000022051.13	Nkd2	0	1	0.59415	322.633	543.245	-0.751102
ENSMUST00000114465.8	Slc6a8	0	1	1.33425	2722.24	2040.14	0.416025
ENSMUST00000046755.13	Cobl	0	1	208.844	120.481	0	7.70628
ENSMUST00000047273.1	Rpusd1	0	1	0.685192	1268.15	1850.94	-0.545419
ENSMUST00000115242.8	Ahcyl2	0	1	1.91875	1020	531.318	0.940169
ENSMUST00000027286.6	Coa5	3.33067e-16	1	0.864838	3023.62	3496.22	-0.209498
ENSMUST00000029194.11	Skil	0	1	1.51648	2894.32	1908.38	0.600728
ENSMUST00000118470.7	Skil	0	1	2.4169	1640.3	678.34	1.27316
ENSMUST00000043315.13	Serpina3g	0	1	3.55675	196.941	55.1302	1.83056
ENSMUST00000027467.10	Serpine2	0	1	0.835692	3741.64	4477.36	-0.258957
ENSMUST00000097368.9	Pigq	0	1	0.441539	69.5442	158.237	-1.17939
ENSMUST00000036161.11	Pi4ka	0	1	1.28858	9774.66	7585.45	0.365787
ENSMUST00000106354.8	43717	0	1	3.05881	546.169	178.166	1.61297
ENSMUST00000033741.14	Bgn	0	1	1.56852	658.733	419.76	0.649407
ENSMUST00000110136.7	Gpcpd1	0	1	148.294	85.3823	0	7.21232
ENSMUST00000114904.9	Arhgap36	0	1	29.713	572.289	18.7004	4.89302
ENSMUST00000127712.7	Gpcpd1	0	1	0.465238	314.127	675.583	-1.10396
ENSMUST00000196096.1	Gpr12	0	1	0.445259	168.771	379.763	-1.16728
ENSMUST00000057503.6	Lamp5	0	1	0.354578	333.061	940.373	-1.49583
ENSMUST00000134825.2	Kcne1l	0	1	2.16513	244.666	112.835	1.11445
ENSMUST00000162642.7	Pigk	1.11022e-16	1	0.493293	113.565	230.561	-1.01948
ENSMUST00000028727.10	Snap25	0	1	0.764925	56382.3	73709.7	-0.38661
ENSMUST00000110098.3	Snap25	0	1	4.14208	6985.84	1686.11	2.05036
ENSMUST00000108378.9	Coq8b	0	1	113.723	65.3425	0	6.82938
ENSMUST00000020706.4	Adcy1	0	1	0.534681	24798.5	46380.3	-0.90325
ENSMUST00000031597.6	Plbd2	0	1	1.53487	3624.6	2361.39	0.618115
ENSMUST00000131831.7	Plbd2	0	1	1.75269	692.419	394.917	0.809571
ENSMUST00000079204.8	Rph3a	0	1	0.749078	9618.95	12841.3	-0.416813
ENSMUST00000105465.7	Psap	0	1	0.62225	8781	14112	-0.684433
ENSMUST00000037134.6	Hipk4	0	1	0.209473	294.94	1409.28	-2.25517
ENSMUST00000027677.7	Csrp1	0	1	0.784935	5635.07	7179.18	-0.349354
ENSMUST00000108353.8	Hipk4	0	1	0.10248	28.4706	280.748	-3.28658
ENSMUST00000118987.1	Bahcc1	0	1	567.348	328.296	0	9.14809
ENSMUST00000058472.12	Svop	0	1	1.33481	7053.23	5283.97	0.41664
ENSMUST00000198371.1	Gm42864	0	1	2.91009	183.065	62.7024	1.54106
ENSMUST00000086153.7	Fam20b	0	1	0.708582	1621.46	2288.56	-0.496994
ENSMUST00000029645.13	Tdo2	0	1	0.214933	59.8082	279.487	-2.21804
ENSMUST00000183300.1	Gm27004	0	1	4.59261	129.129	27.8728	2.19931
ENSMUST00000020165.13	Pde7b	1.11022e-16	1	0.471894	276.411	586.397	-1.08347
ENSMUST00000047923.11	Sec24d	0	1	1.63947	1699.64	1036.47	0.713232
ENSMUST00000111668.7	Camkk2	0	1	0.568124	2551.93	4492.1	-0.815722
ENSMUST00000061135.7	Msantd3	0	1	96.9286	55.6072	0	6.59885
ENSMUST00000196423.4	Anapc5	0	1	0.769363	1516.98	1971.91	-0.378263
ENSMUST00000032157.8	Gxylt2	0	1	2.97542	309.654	103.864	1.5731
ENSMUST00000054920.4	AI464131	0	1	0.791919	1078.54	1362.02	-0.336576
ENSMUST00000154650.7	Bcas1	0	1	0.618295	2815.8	4554.5	-0.693633
ENSMUST00000001419.8	Zmat2	0	1	0.859426	5299.34	6166.19	-0.218555
ENSMUST00000159780.1	Vwa5b2	0	1	0.513605	260.41	507.573	-0.961268
ENSMUST00000028178.13	Acvr1c	0	1	3.59061	2267.48	631.261	1.84423
ENSMUST00000179094.7	Slc38a10	0	1	1.308	2677.29	2046.71	0.387366
ENSMUST00000165602.8	Atp2b4	0	1	6.13773	557.084	90.2785	2.61771
ENSMUST00000048432.5	Prelp	0	1	0.545306	590.088	1082.38	-0.874863
ENSMUST00000156979.1	Syt1	0	1	0.481711	330.952	687.659	-1.05376
ENSMUST00000117892.1	Slc48a1	0	1	0.838579	3755.13	4478.03	-0.253982
ENSMUST00000100089.2	Rprm	0	1	2.88991	2526.36	873.995	1.53103
ENSMUST00000166750.8	Cmip	0	1	1.33635	6129.46	4586.57	0.418299
ENSMUST00000222957.1	Ntsr2	0	1	1.19195	2892.7	2426.8	0.253326
ENSMUST00000065060.11	Tmcc3	1.44329e-15	1	0.80454	1532.62	1905.05	-0.313763
ENSMUST00000041093.5	Creb3l2	1.33227e-15	1	1.39577	841.782	603.006	0.481063
ENSMUST00000139848.7	Rasd2	7.77156e-16	1	0.617193	1056.16	1711.44	-0.696206
ENSMUST00000092640.5	St3gal1	1.22125e-15	1	0.473488	473.868	1001.15	-1.0786
ENSMUST00000033442.13	Igsf1	5.55112e-16	1	0.560215	152.761	273.138	-0.835946
ENSMUST00000102838.9	Sptbn1	9.99201e-16	1	0.684115	1565.61	2288.67	-0.547689
ENSMUST00000091813.11	Slc14a1	1.66533e-15	1	1.38872	859.457	618.793	0.473751
ENSMUST00000020522.8	Pfkl	1.77636e-15	1	1.41804	11682	8238.08	0.503896
ENSMUST00000075052.9	Kcnh7	2.44249e-15	1	0.63971	1268.87	1983.68	-0.64451
ENSMUST00000161854.7	Pip5k1c	1.66533e-15	1	1.29444	10202.5	7881.63	0.372327
ENSMUST00000103007.3	Nudt11	1.9984e-15	1	1.281	1407.3	1098.53	0.357266
ENSMUST00000117695.7	Blnk	3.10862e-15	1	3.24297	209.777	64.2857	1.69732
ENSMUST00000150134.1	Phospho1	2.88658e-15	1	1.74733	313.543	179.193	0.805155
ENSMUST00000191638.5	Mbnl1	4.10783e-15	1	67.9104	38.7861	0	6.08556
ENSMUST00000160556.7	Bscl2	6.21725e-15	1	1.39063	1123.87	808.016	0.475734
ENSMUST00000154424.7	Reps2	7.99361e-15	1	1.23343	7926.67	6426.43	0.302674
ENSMUST00000209897.1	AU023762	7.66054e-15	1	2.51139	113.261	44.8973	1.32849
ENSMUST00000023610.14	Adamts1	8.10463e-15	1	0.665725	471.111	707.835	-0.587002
ENSMUST00000102518.9	Ece1	8.43769e-15	1	1.38535	2109.23	1522.44	0.47025
ENSMUST00000190827.6	Vgf	7.77156e-15	1	2.03243	547.42	269.048	1.02321
ENSMUST00000166968.8	Nrg3	9.32587e-15	1	1.24988	1416.53	1133.27	0.321788
ENSMUST00000109528.8	Blcap	8.54872e-15	1	1.19542	3355.42	2806.79	0.257522
ENSMUST00000188120.1	Tex264	1.31006e-14	1	4.75543	47.4232	9.51464	2.24958
ENSMUST00000041282.12	Trim37	1.32117e-14	1	0.81979	9273.7	11312.4	-0.286674
ENSMUST00000095893.10	Armt1	1.73195e-14	1	0.617309	438.489	710.682	-0.695934
ENSMUST00000171289.7	Camk2d	2.74225e-14	1	3.47105	131.831	37.5675	1.79537
ENSMUST00000179755.7	Arrb1	2.90878e-14	1	2.10539	145.852	68.971	1.07409
ENSMUST00000156038.1	Ankrd50	3.05311e-14	1	1.48742	1460.86	982.035	0.572811
ENSMUST00000198029.4	Camkk2	3.37508e-14	1	0.596363	373.842	627.097	-0.745738
ENSMUST00000027370.12	Pnkd	3.57492e-14	1	0.720604	3142.62	4361.32	-0.472722
ENSMUST00000022947.6	Matn2	5.39568e-14	1	1.40795	970.538	689.158	0.493598
ENSMUST00000079169.4	Kcnd3	6.15064e-14	1	3.51176	165.605	46.7427	1.81219
ENSMUST00000120875.7	Ankrd50	6.55032e-14	1	1.62509	580.234	356.825	0.700515
ENSMUST00000005255.8	Wisp1	7.67164e-14	1	5.76136	151.067	25.944	2.52641
ENSMUST00000023015.13	Wnt7b	7.91589e-14	1	1.43835	1243.94	864.66	0.524413
ENSMUST00000204343.2	Aup1	7.86038e-14	1	0.487547	138.402	284.484	-1.03639
ENSMUST00000056740.5	Gldn	8.51541e-14	1	2.26217	156.887	69.1787	1.1777
ENSMUST00000174193.7	Mobp	9.03722e-14	1	0.591998	14357.6	24253	-0.756335
ENSMUST00000109420.9	Gdap1l1	9.19265e-14	1	1.3321	1208.65	907.183	0.413707
ENSMUST00000079439.9	Tmem91	9.40359e-14	1	2.32692	318.04	136.487	1.21842
ENSMUST00000040880.7	Map6d1	1.00697e-13	1	0.683821	1463.18	2139.86	-0.54831
ENSMUST00000100026.9	Ccdc50	1.02807e-13	1	0.852855	1756.42	2059.52	-0.229628
ENSMUST00000199537.4	Rimbp2	1.09801e-13	1	2.023	7347.47	3631.67	1.0165
ENSMUST00000042438.12	Plekhg1	1.16906e-13	1	0.653805	467.893	715.953	-0.613068
ENSMUST00000197845.1	Trim2	1.31561e-13	1	2.60791	123.257	47.0707	1.3829
ENSMUST00000114268.4	Snca	1.4122e-13	1	1.36494	12731.7	9327.45	0.448841
ENSMUST00000032487.13	Vamp1	1.61982e-13	1	0.42855	1519.88	3547.34	-1.22246
ENSMUST00000100635.4	Fam84b	1.80078e-13	1	0.697457	525.5	753.586	-0.519823
ENSMUST00000105996.7	Serinc2	1.82854e-13	1	3.57	931.042	260.378	1.83592
ENSMUST00000168632.1	Tef	2.33591e-13	1	0.591079	155.865	263.926	-0.758576
ENSMUST00000147991.1	Paqr6	2.4436e-13	1	1.66373	354.634	212.925	0.734422
ENSMUST00000103108.7	Wnk4	2.47802e-13	1	0.402046	56.2351	140.734	-1.31457
ENSMUST00000138703.7	Pfkp	2.52021e-13	1	1.26967	4285.93	3375.5	0.344454
ENSMUST00000088373.10	Srgap3	2.63789e-13	1	1.16351	7902.25	6791.67	0.21848
ENSMUST00000126390.7	Reps1	2.67231e-13	1	0.759753	853.734	1123.88	-0.396397
ENSMUST00000207932.1	Prss23	3.32179e-13	1	3.87421	1656.53	427.148	1.9539
ENSMUST00000042564.16	Ghitm	3.57603e-13	1	0.85114	8367.69	9831.26	-0.232532
ENSMUST00000122182.1	Cbx5	3.73479e-13	1	1.70112	255.2	149.78	0.766488
ENSMUST00000037480.8	Wipf2	3.98126e-13	1	0.839697	2374.61	2828	-0.252059
ENSMUST00000197425.1	Sez6l	4.68292e-13	1	3.11927	72.2879	22.7808	1.64121
ENSMUST00000079857.8	Cdc25b	5.36904e-13	1	0.655838	427.293	651.827	-0.608589
ENSMUST00000030714.7	Sema3a	6.2883e-13	1	2.17438	172.186	79.0078	1.1206
ENSMUST00000088013.11	Myrf	6.6358e-13	1	0.716885	1281.38	1787.66	-0.480185
ENSMUST00000064783.9	Mfap4	7.95808e-13	1	4.471	465.557	103.678	2.1606
ENSMUST00000149684.1	Por	7.9714e-13	1	5.51095	40.065	6.79559	2.4623
ENSMUST00000056521.11	2900011O08Rik	1.39089e-12	1	1.15617	9255.78	8005.53	0.209351
ENSMUST00000139560.7	Ndc1	1.44007e-12	1	1.27722	934.087	731.216	0.35301
ENSMUST00000120878.8	43716	1.53777e-12	1	0.689178	546.234	792.849	-0.537052
ENSMUST00000028735.7	Jag1	1.91858e-12	1	0.674376	226.289	335.704	-0.568374
ENSMUST00000123436.1	Lamp5	2.57727e-12	1	0.490096	226.8	463.369	-1.02886
ENSMUST00000187137.6	Mag	2.75624e-12	1	0.421921	1448.01	3432.75	-1.24495
ENSMUST00000172088.7	Zfp239	3.16802e-12	1	0.678884	771.911	1137.3	-0.558764
ENSMUST00000108224.7	Pex5l	5.05385e-12	1	0.452474	367.012	811.825	-1.14409
ENSMUST00000156453.9	Cys1	6.5925e-12	1	0.537311	207.087	385.912	-0.896169
ENSMUST00000036376.12	Tmub2	7.17915e-12	1	0.717441	723.177	1008.22	-0.479068
ENSMUST00000127337.1	Gm11681	8.4851e-12	1	0.284664	21.5249	76.3986	-1.81267
ENSMUST00000029013.9	Rae1	9.15967e-12	1	1.20993	1691.48	1397.94	0.274924
ENSMUST00000004051.7	Hlf	1.00934e-11	1	0.570822	2396.22	4198.08	-0.808886
ENSMUST00000127088.7	Megf6	1.06692e-11	1	3.54867	85.5713	23.6973	1.82728
ENSMUST00000110551.3	Sord	1.09805e-11	1	0.728384	433.519	595.304	-0.45723
ENSMUST00000151224.2	Fam163b	1.26739e-11	1	1.74836	12598.8	7205.96	0.806002
ENSMUST00000019374.13	Lhx9	1.34797e-11	1	0.450371	105.309	234.535	-1.15081
ENSMUST00000060992.5	Rtn4	1.34956e-11	1	0.742818	3879.74	5223.21	-0.42892
ENSMUST00000065587.4	Ackr3	1.43007e-11	1	1.36684	805.838	589.481	0.45084
ENSMUST00000003501.8	Elavl3	1.51522e-11	1	1.0738	10153.3	9455.39	0.102731
ENSMUST00000108709.7	Specc1	1.89517e-11	1	6.49277	326.958	49.8668	2.69883
ENSMUST00000176538.1	Phospho1	1.90106e-11	1	3.92154	52.7826	13.0278	1.97142
ENSMUST00000122409.7	Lrp3	1.97657e-11	1	0.774275	1114.81	1439.98	-0.369082
ENSMUST00000064989.11	Prkcb	2.10588e-11	1	0.774072	4268.76	5514.85	-0.36946
ENSMUST00000138052.7	Per3	2.12591e-11	1	0.52558	337.281	642.255	-0.928018
ENSMUST00000031131.10	Uchl1	2.22649e-11	1	1.50525	11649.2	7738.82	0.590004
ENSMUST00000102632.6	Sort1	2.32193e-11	1	0.716541	14087.2	19660.2	-0.48088
ENSMUST00000050078.12	Sdf4	2.51168e-11	1	0.729038	4450.64	6104.93	-0.455934
ENSMUST00000052602.5	C77080	2.78894e-11	1	3.99055	88.0076	21.6196	1.99659
ENSMUST00000062525.10	Rnf149	3.16589e-11	1	1.33578	1121.6	839.577	0.417679
ENSMUST00000196814.4	Setd2	3.3603e-11	1	6.14265	100.371	15.8548	2.61886
ENSMUST00000168288.8	Cux2	3.85312e-11	1	1.97037	328.817	166.595	0.978465
ENSMUST00000023095.12	43711	4.3923e-11	1	0.916419	18962.4	20691.9	-0.125921
ENSMUST00000034452.11	Ccsap	4.86244e-11	1	1.37532	1986.18	1444	0.45977
ENSMUST00000223999.1	Rps24	5.18888e-11	1	0.538689	536.254	995.976	-0.892475
ENSMUST00000022337.10	Cdhr1	5.61021e-11	1	0.505097	253.72	502.625	-0.985367
ENSMUST00000050715.8	Pcsk5	5.61258e-11	1	2.15101	1229.2	571.274	1.10501
ENSMUST00000140030.7	Camta1	5.81005e-11	1	0.815983	3624.58	4442.11	-0.293389
ENSMUST00000112144.8	Dync1i2	6.20995e-11	1	0.613472	1854.44	3023.23	-0.704931
ENSMUST00000108433.7	Slc43a2	6.40733e-11	1	5.18788	86.3808	16.1826	2.37515
ENSMUST00000022699.9	Gfra2	6.65169e-11	1	0.74813	666.863	891.486	-0.418639
ENSMUST00000067137.13	Tprkb	7.26375e-11	1	0.792386	1509.95	1905.72	-0.335724
ENSMUST00000096057.4	Tagln3	7.34489e-11	1	1.3829	7714.22	5578.2	0.467698
ENSMUST00000145533.7	4933439C10Rik	7.40004e-11	1	0.672389	279.429	415.859	-0.572632
ENSMUST00000126315.7	Thbs3	8.00887e-11	1	0.587507	295.38	503.175	-0.767322
ENSMUST00000127805.7	Sardh	8.35488e-11	1	6.64628	47.242	6.61558	2.73255
ENSMUST00000142850.7	Mbp	8.71087e-11	1	0.669754	7924.21	11831.8	-0.578297
ENSMUST00000190051.1	Trf	8.86841e-11	1	0.583765	403.989	692.454	-0.776541
ENSMUST00000069420.10	Tmem191c	9.62662e-11	1	0.696053	368.467	529.619	-0.52273
ENSMUST00000106040.7	Ifitm1	1.00469e-10	1	2.69309	72.7671	26.6555	1.42926
ENSMUST00000015628.3	Fam163a	1.07408e-10	1	0.672552	333.599	496.172	-0.572283
ENSMUST00000113919.9	Dctn1	1.23266e-10	1	1.14401	3292.08	2877.59	0.194103
ENSMUST00000207038.1	Nhsl1	1.28441e-10	1	4.40071	76.1898	16.8651	2.13774
ENSMUST00000022272.13	Kctd6	1.29839e-10	1	1.27683	2120.86	1660.91	0.352568
ENSMUST00000022819.12	Jph4	1.34332e-10	1	0.718322	9208.38	12819.5	-0.477297
ENSMUST00000110329.7	Azin1	1.40439e-10	1	1.26607	3519.97	2780.11	0.340358
ENSMUST00000162000.3	Pianp	1.42313e-10	1	0.767565	1212.53	1579.89	-0.38164
ENSMUST00000143142.7	Ints6l	1.46856e-10	1	0.793476	711.956	897.413	-0.333741
ENSMUST00000201030.1	Polg	1.49107e-10	1	23.2133	19.202	0.272498	4.53688
ENSMUST00000154256.2	Zfp703	1.50401e-10	1	1.72737	1029.62	595.928	0.78858
ENSMUST00000159903.1	Wnk1	1.52038e-10	1	0.839395	2247.32	2677.42	-0.252579
ENSMUST00000130256.2	B930095G15Rik	1.84645e-10	1	0.761214	1844.64	2423.39	-0.393627
ENSMUST00000167352.1	Atp6v0e	1.87796e-10	1	0.644371	195.934	304.243	-0.634037
ENSMUST00000059241.7	Sprn	1.98769e-10	1	1.32682	12463.8	9393.67	0.407968
ENSMUST00000164607.8	Dtnb	2.06093e-10	1	41.4374	51.431	0.675488	5.37286
ENSMUST00000052012.13	Phka1	2.12887e-10	1	0.78609	890.408	1132.86	-0.347233
ENSMUST00000041388.10	Serpine1	2.28603e-10	1	3.94924	52.2024	12.7855	1.98158
ENSMUST00000114786.7	Hadhb	2.32086e-10	1	0.721888	437.529	606.313	-0.470153
ENSMUST00000045078.12	Grhpr	2.54832e-10	1	0.725739	531.834	732.943	-0.462478
ENSMUST00000116563.7	Klc2	2.77825e-10	1	0.825239	3586.97	4346.7	-0.277116
ENSMUST00000110451.3	Syt16	2.82646e-10	1	0.85051	1662.52	1954.83	-0.2336
ENSMUST00000044616.9	Ints8	2.89674e-10	1	3.3907	90.5871	26.3077	1.76158
ENSMUST00000097999.8	Fam53b	3.35391e-10	1	1.57732	417.939	264.756	0.657476
ENSMUST00000070418.8	Dclk1	3.36085e-10	1	1.45633	14397.7	9886.11	0.542335
ENSMUST00000049230.10	Kcnab1	3.41997e-10	1	0.782744	3683.21	4705.67	-0.353387
ENSMUST00000113865.4	Rbpj	3.52841e-10	1	2.16519	708.746	327.025	1.11449
ENSMUST00000150706.7	Slc25a42	3.69649e-10	1	1.79706	241.051	133.987	0.84564
ENSMUST00000137312.1	Ndufs5	3.84802e-10	1	2.96067	78.041	25.9754	1.56592
ENSMUST00000054173.3	Phospho1	3.97497e-10	1	1.72308	592.371	343.543	0.784989
ENSMUST00000041685.6	Neurod2	4.30503e-10	1	1.73174	9122.27	5267.57	0.792219
ENSMUST00000061568.8	Slc36a4	4.64397e-10	1	0.813988	2165.1	2659.94	-0.29692
ENSMUST00000059018.13	Fbxo31	5.30879e-10	1	0.866251	4013.62	4633.37	-0.207143
ENSMUST00000206389.1	Aqp11	5.31195e-10	1	0.668629	497.771	744.619	-0.580721
ENSMUST00000160218.1	Smim17	5.33899e-10	1	0.668097	410.719	614.914	-0.58187
ENSMUST00000016081.12	H2afy	5.58306e-10	1	1.64943	1841.37	1116.14	0.721964
ENSMUST00000093321.11	Grb10	5.68703e-10	1	1.26152	915.856	725.875	0.33516
ENSMUST00000174266.7	Uggt1	5.80639e-10	1	1.49773	625.609	417.511	0.582779
ENSMUST00000021595.9	Psmc1	6.15923e-10	1	1.15559	4087.3	3536.92	0.208634
ENSMUST00000039135.5	Dock5	6.35206e-10	1	0.706871	254.402	360.038	-0.500482
ENSMUST00000079978.12	Unc13b	7.04639e-10	1	1.26813	1622.42	1279.25	0.342708
ENSMUST00000219426.1	Plekhg3	7.33558e-10	1	0.606828	142.009	234.236	-0.72064
ENSMUST00000114629.3	Mamld1	7.79505e-10	1	3.1229	161.417	51.294	1.64289
ENSMUST00000205335.1	Mat2a	7.99416e-10	1	0.775996	3042.42	3920.83	-0.36588
ENSMUST00000105235.9	Smarcc2	8.61435e-10	1	1.20126	2529.08	2105.26	0.264551
ENSMUST00000191578.6	Actr3	1.11627e-09	1	2.36743	378.004	159.333	1.24332
ENSMUST00000004774.3	Aqp1	1.26372e-09	1	3.74439	53.4883	14.0565	1.90473
ENSMUST00000111265.8	Tspan18	1.34722e-09	1	0.47737	641.605	1344.41	-1.06682
ENSMUST00000111962.7	Hnrnpa3	1.35228e-09	1	0.882032	8035.32	9110.06	-0.181097
ENSMUST00000003529.8	Paf1	1.58107e-09	1	1.18413	1768.6	1493.49	0.243826
ENSMUST00000086199.11	Glul	1.61891e-09	1	0.668455	33429.2	50009.8	-0.581098
ENSMUST00000110463.7	Cops2	1.62193e-09	1	0.845299	1588.14	1878.86	-0.242467
ENSMUST00000088827.6	Mapk12	1.62253e-09	1	2.53894	324.242	127.519	1.34423
ENSMUST00000072971.12	Atp8a1	1.68388e-09	1	1.41469	2269.03	1603.74	0.500482
ENSMUST00000036928.11	Ephx1	1.75681e-09	1	0.638509	502.946	788.016	-0.647221
ENSMUST00000025778.7	Gldc	2.12067e-09	1	0.691185	1238.11	1791.42	-0.532856
ENSMUST00000182125.1	Mir9-3hg	2.54574e-09	1	1.63651	211.178	128.816	0.710626
ENSMUST00000044113.10	Ago2	2.6972e-09	1	1.24965	5637.82	4511.48	0.321518
ENSMUST00000106653.3	Usp47	2.77067e-09	1	1.2286	3458.98	2815.28	0.297012
ENSMUST00000044009.13	Camk1d	2.88576e-09	1	0.747282	6663.48	8917.06	-0.420276
ENSMUST00000027186.11	Trak2	2.93134e-09	1	1.33646	8803.61	6587.18	0.418416
ENSMUST00000166315.6	Akap13	2.95929e-09	1	6.1883	516.18	82.9262	2.62954
ENSMUST00000045295.13	Pnpla7	2.99634e-09	1	0.713662	305.177	427.854	-0.486687
ENSMUST00000107110.7	Elavl2	3.0386e-09	1	13.3639	86.9688	5.97145	3.74027
ENSMUST00000023024.7	Tef	3.08785e-09	1	0.748631	4611.25	6159.78	-0.417673
ENSMUST00000202179.1	Specc1	3.1579e-09	1	0.841222	1961.4	2331.72	-0.249441
ENSMUST00000215603.1	Scg3	3.22266e-09	1	0.488346	203.932	418.205	-1.03402
ENSMUST00000201469.3	Stim2	3.30142e-09	1	2.10047	633.688	301.385	1.07071
ENSMUST00000000412.2	Egfl6	3.31092e-09	1	0.484017	67.4449	139.676	-1.04687
ENSMUST00000110128.4	Dtnbp1	3.37208e-09	1	0.312723	39.5616	127.781	-1.67704
ENSMUST00000002053.8	Npas1	3.5518e-09	1	3.10694	306.106	98.1302	1.6355
ENSMUST00000031090.7	Sel1l3	3.81256e-09	1	1.43552	3216.01	2240.21	0.521574
ENSMUST00000093773.7	Mobp	3.89467e-09	1	0.595272	1228.36	2063.73	-0.74838
ENSMUST00000101586.2	Camk2b	4.15553e-09	1	9.71861	48.3453	4.45448	3.28075
ENSMUST00000033133.11	Rgs10	4.52857e-09	1	1.33035	857.05	644.147	0.411803
ENSMUST00000153739.8	Nnat	4.64279e-09	1	1.78687	10057.9	5628.53	0.837434
ENSMUST00000224347.1	Nedd4l	4.73848e-09	1	1.31187	1235.15	941.375	0.391629
ENSMUST00000211392.1	Zscan18	5.38355e-09	1	0.53241	271.87	511.148	-0.90939
ENSMUST00000049324.12	Flt3	5.41314e-09	1	0.638258	250.304	392.358	-0.647789
ENSMUST00000001548.13	Itga3	6.16958e-09	1	1.57362	306.534	194.585	0.654085
ENSMUST00000139333.7	Slc25a42	6.80828e-09	1	1.89409	890.114	469.67	0.921502
ENSMUST00000004050.6	Mmd	6.99652e-09	1	1.31419	16504.2	12558.4	0.394174
ENSMUST00000213179.1	Abhd14b	7.05857e-09	1	0.62276	163.026	262.13	-0.683253
ENSMUST00000017878.2	Dbndd2	7.14716e-09	1	0.772886	458.457	593.273	-0.371672
ENSMUST00000040790.13	Slx4	7.15097e-09	1	1.49195	587.227	393.404	0.577204
ENSMUST00000164362.1	5730409E04Rik	7.36179e-09	1	0.69958	1855.07	2651.94	-0.515439
ENSMUST00000164022.7	Glod4	7.74492e-09	1	4.54038	68.9424	14.7323	2.18281
ENSMUST00000149936.1	Hspa8	8.11248e-09	1	0.629384	177.844	282.766	-0.667989
ENSMUST00000115576.2	Lix1	8.73365e-09	1	1.16734	2496.27	2138.34	0.223225
ENSMUST00000175858.8	Nptxr	8.80851e-09	1	1.51964	53639.7	35297.5	0.603726
ENSMUST00000214256.1	Scamp5	9.11224e-09	1	1.38685	724.789	522.452	0.471815
ENSMUST00000120544.8	Klc1	9.37792e-09	1	1.29524	9136.69	7053.95	0.373214
ENSMUST00000044155.14	Ubash3b	1.00717e-08	1	1.3513	1815.83	1343.69	0.434343
ENSMUST00000205845.1	Vstm2b	1.04207e-08	1	1.32859	1118.47	841.707	0.409893
ENSMUST00000030763.12	Cdk14	1.07123e-08	1	0.779552	4158.42	5334.53	-0.359282
ENSMUST00000029717.3	Cd1d1	1.08074e-08	1	2.98071	64.6601	21.3076	1.57566
ENSMUST00000048375.5	Fam102a	1.10293e-08	1	0.849864	2966.32	3490.44	-0.234696
ENSMUST00000133547.1	Anxa11	1.23156e-08	1	2.23204	170.409	76.0269	1.15836
ENSMUST00000105847.7	Kdm1a	1.64685e-08	1	1.18075	1370.77	1160.84	0.239705
ENSMUST00000091636.3	Lrrtm2	1.79657e-08	1	1.21209	2783.58	2296.45	0.277501
ENSMUST00000224784.1	Adamts6	1.81706e-08	1	1.68328	208.034	123.353	0.751271
ENSMUST00000060537.12	Kif1b	1.89945e-08	1	0.94729	25358.8	26769.9	-0.0781223
ENSMUST00000080008.12	Arfgap2	2.07504e-08	1	1.24771	1318.27	1056.44	0.319282
ENSMUST00000168902.7	Serpinf1	2.21076e-08	1	1.83143	244.545	133.263	0.872972
ENSMUST00000075387.10	Sez6l	2.24175e-08	1	1.32916	9307.83	7002.67	0.410511
ENSMUST00000093829.8	Megf11	2.35811e-08	1	2.59495	166.698	63.8832	1.3757
ENSMUST00000057944.11	Ugt8a	2.45376e-08	1	0.752828	1166.16	1549.23	-0.409607
ENSMUST00000208730.1	Picalm	2.48779e-08	1	0.491063	189.102	385.688	-1.02602
ENSMUST00000041826.13	Rnf13	2.48848e-08	1	0.810744	2338.49	2884.51	-0.302682
ENSMUST00000218290.1	Itga7	2.66806e-08	1	0.36239	61.0804	169.569	-1.46438
ENSMUST00000060918.10	Amz1	2.77063e-08	1	1.616	241.477	149.207	0.692431
ENSMUST00000222218.1	Gm34466	2.8265e-08	1	2.25773	91.2668	40.2505	1.17487
ENSMUST00000112983.7	Dab2ip	2.95864e-08	1	0.662042	1455.45	2198.72	-0.595006
ENSMUST00000176204.7	Peg10	2.98516e-08	1	9.63923	755.47	77.855	3.26892
ENSMUST00000148131.7	Clcn2	3.09335e-08	1	0.659466	192.818	292.685	-0.60063
ENSMUST00000116648.7	Slc7a4	3.38418e-08	1	1.87197	1862.91	994.893	0.904556
ENSMUST00000107475.8	Rara	3.41757e-08	1	4.92547	202.521	40.6552	2.30026
ENSMUST00000021770.7	Scgn	3.45426e-08	1	0.283799	10.2467	36.892	-1.81706
ENSMUST00000025800.14	Pip5k1b	3.47321e-08	1	0.665051	1194.76	1796.79	-0.588464
ENSMUST00000114050.7	Tmsb10	3.84246e-08	1	1.56059	2913.06	1866.43	0.642091
ENSMUST00000070699.14	Pign	3.91355e-08	1	0.555245	256.549	462.51	-0.848804
ENSMUST00000074233.11	Synm	4.0514e-08	1	0.597349	344.158	576.532	-0.743354
ENSMUST00000107045.8	Plekhb1	4.1921e-08	1	0.706452	1374.04	1945.23	-0.501337
ENSMUST00000106843.7	Smarcd2	4.21723e-08	1	0.646427	375.777	581.631	-0.629441
ENSMUST00000134040.1	Tpt1	5.12973e-08	1	1.25637	7609.29	6056.43	0.329267
ENSMUST00000055858.13	2410002F23Rik	5.15999e-08	1	1.21253	2055.25	1694.92	0.278015
ENSMUST00000077642.11	Kifap3	5.4724e-08	1	0.914499	8466.98	9258.65	-0.128946
ENSMUST00000120071.7	Psd3	5.72742e-08	1	1.11006	20148.1	18150.4	0.150639
ENSMUST00000090839.11	Selenbp1	5.94075e-08	1	0.642874	210.3	327.446	-0.637392
ENSMUST00000002818.8	Ykt6	5.95763e-08	1	1.12951	2967.09	2626.84	0.1757
ENSMUST00000125660.2	Guf1	6.20851e-08	1	0.769916	819.554	1064.57	-0.377226
ENSMUST00000073109.11	Ctdspl	6.401e-08	1	0.677899	790.291	1165.94	-0.560858
ENSMUST00000156434.8	Sardh	6.73759e-08	1	2.6118	59.5226	22.4322	1.38504
ENSMUST00000033040.11	Pak1	7.78646e-08	1	0.839621	8660.65	10315.1	-0.25219
ENSMUST00000115510.7	Phf14	8.44651e-08	1	2.86237	76.6097	26.3873	1.51721
ENSMUST00000063544.10	Slc7a4	8.59779e-08	1	1.89802	1566.91	825.273	0.924497
ENSMUST00000196483.4	Fbxl5	9.62653e-08	1	0.0907983	36.995	413.246	-3.46119
ENSMUST00000028854.14	Mal	9.73079e-08	1	0.602542	4992.7	8286.28	-0.730867
ENSMUST00000074085.11	Rpl10	1.01494e-07	1	1.34501	704.496	523.635	0.42762
ENSMUST00000151408.7	Rasgrf2	1.10959e-07	1	0.629679	1961.87	3115.85	-0.667311
ENSMUST00000176557.7	Nptn	1.12526e-07	1	0.880422	9860.57	11199.9	-0.183733
ENSMUST00000162424.1	Panx2	1.13511e-07	1	0.786846	3329.98	4232.15	-0.345847
ENSMUST00000114002.8	Itsn1	1.13525e-07	1	0.872106	3226.1	3699.25	-0.197425
ENSMUST00000080936.12	Med15	1.14031e-07	1	1.42279	1931.85	1357.62	0.508718
ENSMUST00000005493.13	Slc1a3	1.1773e-07	1	0.827805	17992.1	21734.8	-0.272637
ENSMUST00000105670.7	Camta1	1.19547e-07	1	1.63409	1719.74	1052.19	0.708485
ENSMUST00000079758.8	Aplp2	1.19832e-07	1	0.89214	7369.08	8260.07	-0.164658
ENSMUST00000043349.6	Grid1	1.2058e-07	1	0.856855	2178.51	2542.51	-0.222877
ENSMUST00000029633.4	Npy2r	1.35361e-07	1	0.57164	453.692	794.102	-0.80682
ENSMUST00000110784.7	Radil	1.43745e-07	1	3.9883	70.2319	17.1752	1.99577
ENSMUST00000202556.3	Slc5a6	1.54698e-07	1	0.709229	283.398	399.823	-0.495677
ENSMUST00000019734.10	Cyb561	1.56842e-07	1	1.15913	1646.96	1420.81	0.213044
ENSMUST00000141482.2	Slc27a2	1.83337e-07	1	0.422805	43.8055	104.398	-1.24193
ENSMUST00000137103.7	Serpinf1	1.83847e-07	1	3.11826	75.1476	23.7055	1.64074
ENSMUST00000179361.1	Prss23os	1.83894e-07	1	3.74232	84.0754	22.2207	1.90393
ENSMUST00000166580.1	Elmod1	1.90479e-07	1	0.654522	3048.55	4657.97	-0.611485
ENSMUST00000040636.8	Sec1	1.94094e-07	1	0.320255	43.1508	135.401	-1.64271
ENSMUST00000111416.6	Ildr2	1.98443e-07	1	1.24028	6353.23	5122.36	0.310664
ENSMUST00000035340.13	Usp54	2.08094e-07	1	0.755166	1973.34	2613.31	-0.405133
ENSMUST00000062978.6	BC030500	2.15739e-07	1	0.693311	227.011	327.569	-0.528426
ENSMUST00000023352.8	Prkdc	2.17241e-07	1	0.779091	1126.23	1445.66	-0.360135
ENSMUST00000175935.7	Smarca2	2.19618e-07	1	0.716202	367.216	512.956	-0.481561
ENSMUST00000100070.4	Samd5	2.3298e-07	1	0.752244	635.358	844.719	-0.410726
ENSMUST00000094251.10	Fam217b	2.44538e-07	1	0.831581	1811.03	2177.87	-0.266072
ENSMUST00000065957.6	Syt5	2.46609e-07	1	1.44526	5139.74	3556.18	0.531328
ENSMUST00000055931.4	Dusp18	2.52345e-07	1	1.45123	1878.97	1294.64	0.537273
ENSMUST00000030212.14	Sh3gl2	2.71818e-07	1	1.14281	12936	11319.5	0.192579
ENSMUST00000034285.13	Cotl1	2.75496e-07	1	1.99927	5408.52	2704.95	0.999475
ENSMUST00000034300.7	Hsbp1	2.76402e-07	1	1.2113	7840.34	6472.56	0.276558
ENSMUST00000111080.7	Ap1s1	2.80557e-07	1	1.35024	6374.37	4720.84	0.433214
ENSMUST00000107251.8	Pi4kb	2.854e-07	1	1.81867	410.795	225.616	0.86288
ENSMUST00000107272.5	Cgn	2.88197e-07	1	1.85743	137.363	73.6858	0.893306
ENSMUST00000185569.1	Itm2c	3.11032e-07	1	0.74943	497.384	663.877	-0.416134
ENSMUST00000103139.10	Thra	3.13735e-07	1	0.847077	1667.66	1968.78	-0.239434
ENSMUST00000025925.10	Pla2g16	3.23294e-07	1	0.757939	610.651	805.779	-0.399846
ENSMUST00000097810.9	Rims1	3.3276e-07	1	0.605014	311.719	515.605	-0.72496
ENSMUST00000090940.5	Ermn	3.36147e-07	1	0.861327	1538.99	1786.82	-0.215367
ENSMUST00000139350.7	Dzip3	3.38097e-07	1	1.20409	1207.72	1002.96	0.267948
ENSMUST00000027343.5	Ogfrl1	3.38783e-07	1	0.76152	4911.48	6449.67	-0.393047
ENSMUST00000050918.3	Camk2n1	3.52211e-07	1	0.723418	14635.8	20231.5	-0.467098
ENSMUST00000021822.6	Ogn	3.77282e-07	1	0.154667	41.2853	268.633	-2.69276
ENSMUST00000088973.10	Smarca1	3.8065e-07	1	1.32835	1052.9	792.494	0.40964
ENSMUST00000132918.7	Orc3	3.94086e-07	1	2.90261	95.3065	32.4548	1.53735
ENSMUST00000006235.8	Ctsb	4.11183e-07	1	0.878039	13318.9	15169	-0.187644
ENSMUST00000023807.6	Igfbp6	4.13501e-07	1	2.60924	573.185	219.482	1.38363
ENSMUST00000200541.4	Aldh2	4.17036e-07	1	0.586171	155.158	265.106	-0.770606
ENSMUST00000022416.14	Anxa11	4.78905e-07	1	1.62992	3031.69	1859.8	0.704801
ENSMUST00000087883.12	Col3a1	4.83212e-07	1	3.72704	212.444	56.7558	1.89803
ENSMUST00000206495.1	Prkcb	5.11665e-07	0.999999	0.768036	3941.42	5131.92	-0.380754
ENSMUST00000023750.7	Faim2	5.12755e-07	0.999999	0.823859	15501.1	18815.4	-0.279531
ENSMUST00000097742.2	Tmem88b	5.18828e-07	0.999999	0.674471	1447.77	2146.67	-0.568172
ENSMUST00000187639.1	Adgrb1	5.2287e-07	0.999999	1.94265	401.921	206.612	0.958026
ENSMUST00000059078.3	Fam43a	5.28343e-07	0.999999	1.80575	456.484	252.656	0.852595
ENSMUST00000107462.7	Dpm3	6.008e-07	0.999999	12.2249	130.978	10.4066	3.61175
ENSMUST00000029075.4	Dok5	6.01612e-07	0.999999	1.83122	800.665	437.089	0.872806
ENSMUST00000049836.13	Specc1	6.06707e-07	0.999999	0.774888	698.253	901.199	-0.36794
ENSMUST00000217573.1	Ppp1r14c	6.07147e-07	0.999999	0.696365	188.062	270.315	-0.522083
ENSMUST00000038185.9	Exd2	6.11853e-07	0.999999	0.85081	2129.95	2503.54	-0.233092
ENSMUST00000187727.1	Gm28578	6.14911e-07	0.999999	2.92922	89.0536	30.1965	1.55052
ENSMUST00000108987.7	43716	6.50781e-07	0.999999	0.801944	1006.21	1254.85	-0.318427
ENSMUST00000034983.6	Atp1b3	6.65603e-07	0.999999	1.15981	3338.3	2878.28	0.213887
ENSMUST00000107478.8	Adamts17	6.91701e-07	0.999999	0.468778	60.6628	130.063	-1.09302
ENSMUST00000160620.2	Arap2	6.97723e-07	0.999999	0.649557	331.098	510.041	-0.622471
ENSMUST00000036424.2	Alox12b	7.08295e-07	0.999999	0.385748	94.6887	245.964	-1.37427
ENSMUST00000033001.5	Dgat2	7.25352e-07	0.999999	1.33072	3404.47	2558.28	0.41221
ENSMUST00000069600.12	Ndrg3	7.45885e-07	0.999999	0.854898	1681.78	1967.32	-0.226176
ENSMUST00000103194.9	Car4	8.2007e-07	0.999999	0.708445	1033.72	1459.38	-0.497271
ENSMUST00000165363.7	Smpd4	8.52691e-07	0.999999	0.731156	835.802	1143.34	-0.45175
ENSMUST00000028624.8	Gatm	8.99515e-07	0.999999	0.760781	2055.11	2701.41	-0.394447
ENSMUST00000224954.1	Daam2	9.35355e-07	0.999999	0.823529	3407.59	4137.86	-0.280108
ENSMUST00000165199.7	Arsa	9.38361e-07	0.999999	1.28879	650.407	504.535	0.366019
ENSMUST00000119430.2	Samd8	9.6823e-07	0.999999	1.179	3391.97	2876.94	0.237564
ENSMUST00000143836.7	Meg3	9.70409e-07	0.999999	1.30906	3737.72	2855.13	0.388536
ENSMUST00000099992.9	Pde11a	9.7839e-07	0.999999	1.46687	386.594	263.444	0.552737
ENSMUST00000029540.12	Npr1	9.90438e-07	0.999999	0.580476	90.4195	156.01	-0.784691
ENSMUST00000033846.6	Angpt2	1.00245e-06	0.999999	2.6559	95.6865	35.8336	1.4092
ENSMUST00000178884.7	Rasgrp1	1.02006e-06	0.999999	1.21444	16429.8	13528.5	0.280294
ENSMUST00000201452.3	Hsph1	1.02659e-06	0.999999	1.77121	139.25	78.3657	0.824739
ENSMUST00000143847.7	Meg3	1.03047e-06	0.999999	0.622319	369.883	594.714	-0.684273
ENSMUST00000049152.14	Snx10	1.04859e-06	0.999999	1.23495	4162.61	3370.56	0.304454
ENSMUST00000000910.6	Dbh	1.06264e-06	0.999999	3.10801	82.5892	26.3616	1.63599
ENSMUST00000085658.4	6030419C18Rik	1.10716e-06	0.999999	1.41357	5433.98	3844	0.49934
ENSMUST00000033139.14	Ate1	1.16927e-06	0.999999	1.1938	2259.76	1892.82	0.255563
ENSMUST00000106830.8	Dab1	1.18031e-06	0.999999	0.793025	3714.15	4683.61	-0.334562
ENSMUST00000159365.7	Adra1a	1.19523e-06	0.999999	2.37216	147.214	61.7237	1.2462
ENSMUST00000182944.7	Birc6	1.2102e-06	0.999999	0.552781	644.854	1167.03	-0.855219
ENSMUST00000226393.1	Mtss1	1.22081e-06	0.999999	14.1255	59.3826	3.66529	3.82023
ENSMUST00000186485.6	Pign	1.22094e-06	0.999999	3.05988	354.075	115.325	1.61347
ENSMUST00000085192.6	Aldh6a1	1.22457e-06	0.999999	0.801473	1983.69	2475.2	-0.319274
ENSMUST00000163095.8	Ppp4r3a	1.24645e-06	0.999999	1.5297	367.602	240.109	0.613249
ENSMUST00000001547.7	Col1a1	1.25041e-06	0.999999	2.62709	421.14	160.114	1.39347
ENSMUST00000228749.1	Olfm4	1.3821e-06	0.999999	3.25456	650.682	199.698	1.70246
ENSMUST00000030367.14	Ssbp3	1.39452e-06	0.999999	1.58066	3829.66	2422.7	0.660525
ENSMUST00000041318.13	Ndrg4	1.40442e-06	0.999999	1.79984	15793.1	8774.48	0.847866
ENSMUST00000190080.6	Trerf1	1.49345e-06	0.999999	0.777857	1058.8	1361.27	-0.362423
ENSMUST00000151200.7	Hsd17b10	1.50214e-06	0.999998	4.97432	31.3887	5.847	2.3145
ENSMUST00000160359.1	Plod2	1.53914e-06	0.999998	1.46642	325.515	221.794	0.552303
ENSMUST00000094300.3	Ankrd50	1.57811e-06	0.999998	1.83275	233.675	127.236	0.874011
ENSMUST00000042844.6	Nbl1	1.69252e-06	0.999998	1.37471	2328.25	1693.53	0.459132
ENSMUST00000009727.11	Syngr1	1.71085e-06	0.999998	1.13489	17639.5	15542.8	0.182555
ENSMUST00000087225.5	Pnkd	1.73406e-06	0.999998	0.762948	1809.76	2372.25	-0.390344
ENSMUST00000090614.10	Arhgap1	1.73532e-06	0.999998	1.49047	1710.74	1147.6	0.575764
ENSMUST00000102800.7	Gapvd1	1.7375e-06	0.999998	1.47662	225.649	152.627	0.562296
ENSMUST00000188387.6	Cdk18	1.76771e-06	0.999998	3.13015	54.5142	17.0213	1.64623
ENSMUST00000046174.7	Cldn11	1.86096e-06	0.999998	0.676285	2263.09	3346.5	-0.564297
ENSMUST00000213417.1	Clk3	1.90177e-06	0.999998	1.74187	131.484	75.2371	0.80064
ENSMUST00000046687.15	Spon1	1.92101e-06	0.999998	1.22904	4653.32	3786.08	0.297534
ENSMUST00000190780.6	Fn1	1.97423e-06	0.999998	7.00476	182.933	25.6186	2.80834
ENSMUST00000029311.10	Trpc4	2.00148e-06	0.999998	1.18842	1719.37	1446.68	0.24904
ENSMUST00000109869.1	Psmf1	2.03442e-06	0.999998	1.4136	438.584	310.091	0.499372
ENSMUST00000007584.3	Pcdhac1	2.03756e-06	0.999998	0.638765	186.955	292.871	-0.646642
ENSMUST00000205064.1	Gm44421	2.03806e-06	0.999998	0.547494	50.5907	92.6619	-0.869086
ENSMUST00000021932.5	Drd1	2.05247e-06	0.999998	4.90878	439.635	89.0994	2.29536
ENSMUST00000003038.11	Ap2a2	2.09572e-06	0.999998	1.3232	11922.3	9010.13	0.404033
ENSMUST00000022787.7	Slc7a8	2.12109e-06	0.999998	1.33041	4086.76	3071.73	0.411869
ENSMUST00000228075.1	Zfp870	2.1836e-06	0.999998	0.635824	236.335	372.031	-0.6533
ENSMUST00000025908.6	Kcnk4	2.2135e-06	0.999998	0.600531	126.408	210.702	-0.73569
ENSMUST00000060125.6	Scn4b	2.22509e-06	0.999998	0.437518	376.042	859.889	-1.19259
ENSMUST00000082059.6	Erbb3	2.32795e-06	0.999998	0.662837	294.862	445.008	-0.593275
ENSMUST00000119598.7	Egfem1	2.42577e-06	0.999998	0.514011	131.76	256.653	-0.96013
ENSMUST00000144677.1	Slc44a5	2.47231e-06	0.999998	0.667163	944.158	1415.35	-0.583889
ENSMUST00000148740.7	F730043M19Rik	2.51326e-06	0.999997	0.722909	1025.34	1418.48	-0.468114
ENSMUST00000043915.3	Serpina12	2.61881e-06	0.999997	22.2611	62.6946	2.51864	4.47645
ENSMUST00000225379.1	Ptprs	2.63126e-06	0.999997	1.23379	847.427	686.739	0.303096
ENSMUST00000173593.7	Mtx1	2.72533e-06	0.999997	1.75122	189.534	107.981	0.808361
ENSMUST00000142817.7	Kalrn	2.77085e-06	0.999997	0.657619	581.252	884.175	-0.604676
ENSMUST00000089680.9	Eef1d	2.81585e-06	0.999997	51.9219	29.518	0	5.69827
ENSMUST00000112233.7	Gpm6b	2.88024e-06	0.999997	0.6423	1502.52	2339.6	-0.638682
ENSMUST00000113195.7	Rftn1	2.90207e-06	0.999997	1.53285	480.906	313.531	0.616218
ENSMUST00000135151.2	Repin1	2.94645e-06	0.999997	2.51657	437.026	173.31	1.33146
ENSMUST00000167320.7	Nbeal2	2.95195e-06	0.999997	0.495168	227.583	460.198	-1.01401
ENSMUST00000219033.1	Adamts4	3.00526e-06	0.999997	0.209708	134.151	641.885	-2.25354
ENSMUST00000144400.7	Clcn2	3.0163e-06	0.999997	0.656589	161.282	245.811	-0.606938
ENSMUST00000039161.9	Thyn1	3.01987e-06	0.999997	0.7778	400.096	514.56	-0.362528
ENSMUST00000129851.7	Prkar1b	3.02997e-06	0.999997	1.61671	230.884	142.589	0.693065
ENSMUST00000102672.4	Nfe2l2	3.06759e-06	0.999997	0.79514	445.29	560.096	-0.33072
ENSMUST00000034883.6	Stoml1	3.16071e-06	0.999997	0.81275	1402.06	1725.22	-0.299116
ENSMUST00000168825.7	Tgfb1i1	3.41215e-06	0.999997	2.18281	77.5609	35.2184	1.12619
ENSMUST00000207395.1	Tacc2	3.56701e-06	0.999996	0.61023	577.43	946.62	-0.712575
ENSMUST00000191758.5	Tmem131l	3.5963e-06	0.999996	0.609881	249.603	409.636	-0.713401
ENSMUST00000111351.9	Uap1	3.63733e-06	0.999996	0.446108	107.333	241.317	-1.16453
ENSMUST00000020217.6	Nudt4	3.66236e-06	0.999996	0.826891	2788.53	3372.37	-0.274231
ENSMUST00000111601.1	Lrrc55	3.69576e-06	0.999996	1.75518	766.463	436.542	0.81162
ENSMUST00000050757.15	Ptprd	3.75664e-06	0.999996	0.571843	120.264	210.744	-0.80631
ENSMUST00000107789.7	Cacna1g	3.82707e-06	0.999996	2.54061	1678.91	660.475	1.34518
ENSMUST00000119272.1	Gm13736	3.99167e-06	0.999996	1.86871	101.518	54.0558	0.902039
ENSMUST00000027856.12	Dcaf6	4.04945e-06	0.999996	0.830682	2776.48	3342.53	-0.267633
ENSMUST00000013910.4	Ly6g6e	4.15233e-06	0.999996	4.83369	339.102	69.8882	2.27313
ENSMUST00000028389.3	Frzb	4.18101e-06	0.999996	0.431637	366.582	849.694	-1.21211
ENSMUST00000099623.9	Ano3	4.22989e-06	0.999996	0.637637	3199.16	5017.4	-0.649192
ENSMUST00000042534.14	Ccdc85a	4.36317e-06	0.999996	0.554696	378.36	682.569	-0.850231
ENSMUST00000021532.5	Snapc1	4.37262e-06	0.999996	1.20823	1449.7	1199.8	0.272899
ENSMUST00000167595.8	Fyco1	4.37515e-06	0.999996	0.782831	2913.88	3722.39	-0.353227
ENSMUST00000103120.4	Cnp	4.46614e-06	0.999996	0.786207	4510.99	5737.82	-0.347019
ENSMUST00000027929.9	Mark1	4.48523e-06	0.999996	1.20587	2832.74	2349.07	0.270072
ENSMUST00000023455.11	Ppil2	4.59039e-06	0.999995	1.16055	1744.49	1503.08	0.214808
ENSMUST00000165766.8	Dnm2	4.61051e-06	0.999995	2.64903	98.8057	36.9379	1.40547
ENSMUST00000021166.5	Cygb	4.61129e-06	0.999995	0.738549	1668.44	2259.18	-0.437234
ENSMUST00000023360.13	Mpv17l	4.64958e-06	0.999995	0.8506	1040.83	1223.75	-0.233448
ENSMUST00000000219.9	Th	4.86969e-06	0.999995	2.86666	56.7086	19.4047	1.51937
ENSMUST00000108783.3	Wnt9a	4.87798e-06	0.999995	0.566977	152.754	269.861	-0.818637
ENSMUST00000046983.9	Smpd1	4.88394e-06	0.999995	1.1817	3804.49	3219.45	0.240866
ENSMUST00000014917.7	Dll1	4.93502e-06	0.999995	0.684336	162.874	238.158	-0.547224
ENSMUST00000041591.15	Enpp2	4.94566e-06	0.999995	0.716904	2888.7	4029.64	-0.480148
ENSMUST00000082090.13	Ap3b2	5.19875e-06	0.999995	1.1009	6341.75	5760.47	0.138686
ENSMUST00000057631.11	Sgsm2	5.2128e-06	0.999995	1.4188	3336.05	2351.14	0.504676
ENSMUST00000090481.13	Calu	5.25252e-06	0.999995	1.20239	850.481	707.229	0.265901
ENSMUST00000147695.7	Lonrf2	5.41642e-06	0.999995	1.19326	6446.26	5402.12	0.254912
ENSMUST00000165201.8	Trps1	5.49852e-06	0.999995	0.834186	1168.1	1400.36	-0.26156
ENSMUST00000138030.1	Stoml2	5.77739e-06	0.999994	1.85905	89.1345	47.6784	0.894565
ENSMUST00000037942.10	Ttll7	5.79385e-06	0.999994	0.89308	6513.36	7293.21	-0.163139
ENSMUST00000176364.7	Retsat	5.82593e-06	0.999994	0.516465	41.5574	81.0078	-0.953257
ENSMUST00000018992.3	Rars	5.83486e-06	0.999994	1.1619	1672.29	1439.22	0.216491
ENSMUST00000132612.7	Slc4a3	5.98745e-06	0.999994	0.832844	1110.15	1333.08	-0.263882
ENSMUST00000172884.7	Hnrnpl	6.03967e-06	0.999994	25.1324	61.7358	1.89981	4.65148
ENSMUST00000085774.10	Sdk1	6.03978e-06	0.999994	1.95644	238.496	121.739	0.968233
ENSMUST00000164545.1	Slc7a4	6.47232e-06	0.999994	2.60238	86.1258	32.8889	1.37983
ENSMUST00000183482.1	Htr1b	6.4739e-06	0.999994	0.670775	225.213	335.903	-0.576098
ENSMUST00000106439.1	Mrpl38	6.56159e-06	0.999993	1.25093	1380.65	1103.59	0.322999
ENSMUST00000107236.8	Pip5k1a	6.64001e-06	0.999993	1.79666	945.855	526.195	0.845316
ENSMUST00000023006.6	Lrrc6	6.7819e-06	0.999993	1.58193	158.264	99.93	0.661688
ENSMUST00000151894.8	Pfkp	6.83739e-06	0.999993	1.22497	2739.65	2236.46	0.292742
ENSMUST00000020922.7	Trib2	6.85214e-06	0.999993	3.25784	4178.08	1282.23	1.70392
ENSMUST00000025356.3	Mal2	6.99055e-06	0.999993	0.815715	5581	6841.92	-0.293862
ENSMUST00000085677.8	Stra6	7.04247e-06	0.999993	1.97191	719.832	364.757	0.979595
ENSMUST00000108321.1	Hps3	7.05426e-06	0.999993	0.579551	140.971	243.662	-0.786993
ENSMUST00000030897.14	Megf6	7.12748e-06	0.999993	2.93925	278.631	94.414	1.55545
ENSMUST00000065028.13	Abr	7.15214e-06	0.999993	1.69698	276.626	162.773	0.762967
ENSMUST00000167213.8	Vwa3a	7.2749e-06	0.999993	0.424397	132.866	313.856	-1.23651
ENSMUST00000226913.1	Tiam2	7.31642e-06	0.999993	0.538931	169.862	315.679	-0.891829
ENSMUST00000202537.1	Gm34583	7.45278e-06	0.999993	1.64381	263.725	160.304	0.717048
ENSMUST00000074468.12	Snap91	7.59419e-06	0.999992	1.22413	11047.5	9024.67	0.29176
ENSMUST00000087723.3	Notch3	7.73112e-06	0.999992	1.27061	615.714	484.515	0.345522
ENSMUST00000106663.1	Galnt18	7.7537e-06	0.999992	1.1934	2055.18	1722.03	0.255074
ENSMUST00000105576.1	9430015G10Rik	7.92669e-06	0.999992	20.4568	31.692	0.99788	4.35451
ENSMUST00000031411.14	Aldh2	7.98459e-06	0.999992	0.70154	324.618	462.864	-0.511402
ENSMUST00000003720.4	Crot	8.05703e-06	0.999992	0.764309	734.185	960.69	-0.387772
ENSMUST00000156570.7	Lpin2	8.13952e-06	0.999992	2.53698	125.253	49.0198	1.34311
ENSMUST00000040967.8	Vps37b	8.46985e-06	0.999992	1.91082	1739.45	910.159	0.93419
ENSMUST00000041544.7	Fbln2	8.51711e-06	0.999991	4.6758	90.355	18.8683	2.22521
ENSMUST00000191079.1	Dubr	8.68315e-06	0.999991	2.30993	303.852	131.213	1.20785
ENSMUST00000047331.7	Lgi3	8.85346e-06	0.999991	0.694569	2860.6	4118.77	-0.52581
ENSMUST00000020564.6	Shc2	8.8794e-06	0.999991	1.25523	1167.98	930.423	0.327953
ENSMUST00000039836.14	Plk5	8.91112e-06	0.999991	0.299772	45.0408	151.604	-1.73806
ENSMUST00000100750.9	Mecp2	9.03926e-06	0.999991	0.823003	2386.57	2899.95	-0.28103
ENSMUST00000001812.4	Smo	9.05366e-06	0.999991	0.731246	533.371	729.515	-0.451571
ENSMUST00000178895.1	Gm9821	9.44491e-06	0.999991	1.72561	359.101	207.97	0.787103
ENSMUST00000133544.7	Tor1b	9.73475e-06	0.99999	0.82256	862.423	1048.53	-0.281808
ENSMUST00000212468.1	Hsbp1	9.82014e-06	0.99999	14.9158	101.207	6.24443	3.89877
ENSMUST00000007207.14	Clcn2	9.97841e-06	0.99999	0.798956	1004.97	1258	-0.323812
ENSMUST00000122202.7	Snrpa	1.0776e-05	0.999989	1.29648	698.624	538.729	0.374601
ENSMUST00000055439.3	Notum	1.14563e-05	0.999989	0.321122	13.4856	43.2207	-1.63881
ENSMUST00000025542.9	Psat1	1.1504e-05	0.999988	0.773292	2289.12	2960.4	-0.370914
ENSMUST00000098548.7	Scn1b	1.18636e-05	0.999988	0.819522	4765.39	5814.97	-0.287145
ENSMUST00000211186.1	Tubgcp2	1.18917e-05	0.999988	0.556053	65.8147	118.823	-0.846705
ENSMUST00000107974.2	Iglon5	1.20171e-05	0.999988	1.4144	1603.2	1133.39	0.500186
ENSMUST00000103204.10	Per3	1.225e-05	0.999988	0.592553	503.885	850.762	-0.754984
ENSMUST00000100942.8	Vamp1	1.25579e-05	0.999987	0.805504	988.905	1227.83	-0.312037
ENSMUST00000026635.7	Farp1	1.2933e-05	0.999987	0.792299	1750.05	2208.91	-0.335884
ENSMUST00000107559.2	Mef2d	1.46452e-05	0.999985	1.44531	884.453	611.769	0.531377
ENSMUST00000021832.6	Wrnip1	1.46464e-05	0.999985	1.14067	1952.09	1711.28	0.189883
ENSMUST00000030051.5	Txn1	1.47823e-05	0.999985	1.17705	1614.84	1371.89	0.235175
ENSMUST00000097360.2	Pacsin1	1.51634e-05	0.999985	1.38815	1063.11	765.687	0.473161
ENSMUST00000099705.3	Nxpe3	1.55356e-05	0.999984	0.766143	764.468	997.909	-0.384315
ENSMUST00000120508.7	Celf5	1.55858e-05	0.999984	1.71428	189.36	110.219	0.777605
ENSMUST00000116259.4	Map7	1.56481e-05	0.999984	0.740345	2009.54	2714.53	-0.433731
ENSMUST00000161846.7	Ctnna2	1.57584e-05	0.999984	0.892125	2529.55	2835.5	-0.164683
ENSMUST00000107432.7	Zbtb7b	1.58529e-05	0.999984	0.186493	42.1606	228.599	-2.42281
ENSMUST00000028995.4	Fam210b	1.5944e-05	0.999984	1.75824	2561.54	1456.75	0.814132
ENSMUST00000018792.11	Dusp14	1.6553e-05	0.999983	4.28103	45.7516	10.2428	2.09796
ENSMUST00000151485.7	Ubash3b	1.68322e-05	0.999983	2.22244	166.384	74.5466	1.15215
ENSMUST00000037687.7	Tmem35a	1.69052e-05	0.999983	1.21476	2236.34	1840.91	0.280675
ENSMUST00000071869.11	Plec	1.74586e-05	0.999983	5.85971	359.213	60.8214	2.55083
ENSMUST00000117291.7	Mthfd1l	1.82093e-05	0.999982	0.721358	234.533	325.351	-0.471212
ENSMUST00000173241.7	Adamts10	1.84633e-05	0.999982	3.59115	182.933	50.5216	1.84445
ENSMUST00000221359.1	Cd83	1.89858e-05	0.999981	0.494552	206.113	417.361	-1.01581
ENSMUST00000029256.8	Sec62	1.95149e-05	0.99998	1.07813	5727.28	5312.23	0.108526
ENSMUST00000139454.2	Gm28035	1.96959e-05	0.99998	1.84122	859.551	466.572	0.880664
ENSMUST00000021227.5	Ankrd40	1.98607e-05	0.99998	2.22346	319.8	143.511	1.1528
ENSMUST00000071250.12	Pygl	2.09684e-05	0.999979	0.566348	97.2122	172.091	-0.82024
ENSMUST00000110943.8	Gpatch2	2.10707e-05	0.999979	0.538818	153.088	284.615	-0.892131
ENSMUST00000061427.9	Adamts3	2.17278e-05	0.999978	0.616579	271.797	441.175	-0.697642
ENSMUST00000026839.4	Prps2	2.19439e-05	0.999978	0.776349	818.755	1054.71	-0.365222
ENSMUST00000109844.10	Dlk1	2.4324e-05	0.999976	2.57006	57.367	21.9671	1.3618
ENSMUST00000020497.13	Aldh1l2	2.47347e-05	0.999975	1.43898	326.499	226.795	0.525042
ENSMUST00000130285.8	Appl2	2.51228e-05	0.999975	0.582107	76.5694	131.954	-0.780643
ENSMUST00000048102.14	Myh14	2.52309e-05	0.999975	0.594696	414.823	697.932	-0.749775
ENSMUST00000091031.5	Gm6361	2.54086e-05	0.999975	1.73203	235.335	135.627	0.792464
ENSMUST00000044844.8	Mfsd12	2.55273e-05	0.999974	1.3221	1772.14	1340.33	0.402828
ENSMUST00000162899.7	Lypd1	2.62715e-05	0.999974	0.595026	541.326	910.146	-0.748975
ENSMUST00000209094.1	Map6	2.67189e-05	0.999973	2.61323	57.2514	21.5505	1.38583
ENSMUST00000108112.9	Spata5	2.68278e-05	0.999973	2.85015	47.6829	16.3537	1.51104
ENSMUST00000006104.9	P2rx5	2.70233e-05	0.999973	0.399357	38.0376	95.7506	-1.32425
ENSMUST00000006764.8	Aprt	2.73003e-05	0.999973	1.29402	728.082	562.518	0.371865
ENSMUST00000031815.11	Krba1	2.73624e-05	0.999973	0.418784	94.6002	226.697	-1.25572
ENSMUST00000067215.8	Arfgap3	2.73679e-05	0.999973	1.47065	581.996	395.555	0.556452
ENSMUST00000076463.11	Gpr155	2.74591e-05	0.999973	0.82915	2273.18	2741.7	-0.270295
ENSMUST00000174196.7	Fus	2.80934e-05	0.999972	0.813426	792.095	973.909	-0.297917
ENSMUST00000160482.7	Coq8a	2.81556e-05	0.999972	2.40084	44.7106	18.2847	1.26354
ENSMUST00000170050.7	Mtdh	2.83137e-05	0.999972	3.56291	86.7369	23.9275	1.83305
ENSMUST00000171572.7	Dvl3	2.84974e-05	0.999972	0.765196	333.224	435.654	-0.386099
ENSMUST00000145781.7	Lrrc45	2.86425e-05	0.999971	0.69576	308.134	443.128	-0.523339
ENSMUST00000137856.1	Tssc4	2.88155e-05	0.999971	2.00225	134.389	66.8289	1.00162
ENSMUST00000061260.7	Fat4	2.93396e-05	0.999971	0.483306	841.891	1742.27	-1.04899
ENSMUST00000068916.15	Plpp5	3.09876e-05	0.999969	3.70213	159.753	42.7286	1.88836
ENSMUST00000113741.7	Sptan1	3.1231e-05	0.999969	0.227643	4.25242	20.647	-2.13516
ENSMUST00000141704.7	Cep89	3.18937e-05	0.999968	0.681566	158.239	232.441	-0.553075
ENSMUST00000219063.1	Plekhg3	3.35398e-05	0.999966	0.734034	301.971	411.595	-0.446082
ENSMUST00000076623.7	Arap2	3.45474e-05	0.999965	0.74148	1879.96	2535.54	-0.431521
ENSMUST00000031051.7	Cgref1	3.47137e-05	0.999965	1.35058	551.515	408.272	0.433583
ENSMUST00000224503.1	Kif13b	3.5567e-05	0.999964	0.727831	1368.8	1880.79	-0.458325
ENSMUST00000139511.7	H2afy	3.57009e-05	0.999964	1.40849	330.605	234.555	0.494147
ENSMUST00000221613.1	Odc1	3.74975e-05	0.999963	1.65674	254.597	153.54	0.72835
ENSMUST00000110909.8	Arhgef7	3.75828e-05	0.999962	1.31283	3219.96	2452.6	0.392684
ENSMUST00000031977.11	Agk	3.96788e-05	0.99996	0.804294	1001.49	1245.26	-0.314204
ENSMUST00000095144.9	Pdp1	3.98177e-05	0.99996	1.83794	582.726	316.79	0.878089
ENSMUST00000046892.9	Cplx1	4.02072e-05	0.99996	0.846203	16069.4	18990.1	-0.240923
ENSMUST00000005066.8	Map2k1	4.15174e-05	0.999958	0.846403	8287.87	9791.94	-0.240584
ENSMUST00000028118.8	Prkcq	4.25414e-05	0.999957	0.751635	268.812	357.828	-0.411895
ENSMUST00000026295.9	Tsr2	4.389e-05	0.999956	1.54473	726.465	470.083	0.627351
ENSMUST00000111944.9	Mapk8	4.65347e-05	0.999953	2.11244	283.096	133.709	1.07891
ENSMUST00000225740.1	Epb41l3	4.7985e-05	0.999952	0.713137	330.394	463.53	-0.48775
ENSMUST00000045756.13	S100a10	4.97734e-05	0.99995	1.52108	452.07	297.088	0.605099
ENSMUST00000161115.7	B3gat1	5.17431e-05	0.999948	0.724519	4227.32	5834.88	-0.464905
ENSMUST00000039674.12	Pknox2	5.19716e-05	0.999948	0.717326	555.3	774.353	-0.479298
ENSMUST00000062213.11	Sfxn3	5.23309e-05	0.999948	1.29251	4435.78	3431.78	0.370175
ENSMUST00000001253.7	Slc26a4	5.23575e-05	0.999948	1.48988	722.837	485.063	0.575194
ENSMUST00000002885.7	Epdr1	5.32346e-05	0.999947	0.802841	3339.65	4159.87	-0.316813
ENSMUST00000115126.7	Tnk2	5.3396e-05	0.999947	0.894959	3702.1	4136.68	-0.160107
ENSMUST00000001092.14	Zfp276	5.39117e-05	0.999946	0.752745	410.266	545.217	-0.409766
ENSMUST00000099972.4	Itga4	5.59724e-05	0.999944	0.469841	709.602	1510.65	-1.08975
ENSMUST00000144993.1	5330416C01Rik	5.60895e-05	0.999944	3.52286	62.2347	17.4427	1.81675
ENSMUST00000224667.1	Sorbs1	5.66047e-05	0.999943	0.788063	1208.27	1533.3	-0.343617
ENSMUST00000166185.1	Dync1h1	5.71137e-05	0.999943	1.59286	198.779	124.669	0.671619
ENSMUST00000100143.9	Rc3h2	5.82519e-05	0.999942	0.867816	2184.12	2516.88	-0.204538
ENSMUST00000004036.5	Efnb3	5.86176e-05	0.999941	0.902009	4787.88	5308.05	-0.148786
ENSMUST00000039620.6	Cbr3	5.88106e-05	0.999941	0.656481	182.302	277.859	-0.607176
ENSMUST00000111703.1	Bhlhe41	6.32744e-05	0.999937	1.81439	124.291	68.2429	0.859483
ENSMUST00000035158.15	Trf	6.33919e-05	0.999937	0.587525	2503.38	4261.3	-0.767277
ENSMUST00000107575.8	Lpar1	6.36736e-05	0.999936	0.321599	26.9105	84.9	-1.63666
ENSMUST00000055372.13	Virma	6.46168e-05	0.999935	1.61946	208.988	128.826	0.695513
ENSMUST00000084207.11	Arhgef10	6.72886e-05	0.999933	0.853397	1024.14	1200.17	-0.228712
ENSMUST00000023087.12	Twf1	6.73548e-05	0.999933	1.17283	2477.75	2112.58	0.22999
ENSMUST00000140083.1	Pop5	6.77611e-05	0.999932	0.345794	21.134	62.2141	-1.53202
ENSMUST00000165952.8	Lats1	6.78215e-05	0.999932	1.27473	1953.51	1532.41	0.350196
ENSMUST00000163290.7	Tubgcp6	6.97413e-05	0.99993	2.63938	56.8431	21.1765	1.4002
ENSMUST00000049074.12	Ptprf	7.01728e-05	0.99993	1.30029	1728.17	1328.93	0.378831
ENSMUST00000023790.3	Krt1	7.07763e-05	0.999929	1.81944	217.598	119.456	0.863497
ENSMUST00000062009.13	Elf2	7.10244e-05	0.999929	0.742924	495.731	667.471	-0.428714
ENSMUST00000154533.7	Tpt1	7.18186e-05	0.999928	1.33983	4448.73	3320.22	0.42205
ENSMUST00000078350.12	Csgalnact1	7.18396e-05	0.999928	0.727016	348.684	479.735	-0.45994
ENSMUST00000037330.4	Inha	7.25901e-05	0.999927	0.719356	427.118	593.872	-0.475223
ENSMUST00000037391.11	Cd99l2	7.34313e-05	0.999927	1.32887	1432.09	1077.53	0.410205
ENSMUST00000112934.7	Rc3h2	7.38791e-05	0.999926	2.0471	572.657	279.445	1.03358
ENSMUST00000161204.7	Rdh11	7.47815e-05	0.999925	1.17844	915.276	776.635	0.236875
ENSMUST00000001569.14	Flot1	7.48952e-05	0.999925	0.819121	2099.21	2562.89	-0.287852
ENSMUST00000102585.1	Fgf11	7.57867e-05	0.999924	1.39505	1846.53	1323.46	0.480318
ENSMUST00000161189.7	Ipo9	7.87968e-05	0.999921	0.860279	1153.37	1340.79	-0.217123
ENSMUST00000111220.7	Cadm3	7.92959e-05	0.999921	1.26172	16761.9	13284.8	0.335397
ENSMUST00000110066.7	Gpr68	7.96721e-05	0.99992	2.78476	560.497	200.901	1.47755
ENSMUST00000161491.1	4833422C13Rik	8.00945e-05	0.99992	1.65237	180.672	109.218	0.724537
ENSMUST00000033341.11	Tub	8.22629e-05	0.999918	0.761056	8350.49	10972.3	-0.393926
ENSMUST00000111140.2	Lmo2	8.37492e-05	0.999916	3.12646	86.5281	27.2818	1.64453
ENSMUST00000113169.8	Srgap3	8.78072e-05	0.999912	1.15715	11831.4	10224.5	0.210581
ENSMUST00000104955.3	Sowaha	8.99273e-05	0.99991	0.689748	3418.54	4956.36	-0.535859
ENSMUST00000159417.1	Lypd1	9.11758e-05	0.999909	0.687273	1184.63	1723.81	-0.541046
ENSMUST00000203486.1	Frmd4b	9.32991e-05	0.999907	0.6481	105.444	162.879	-0.625712
ENSMUST00000035301.6	Atp6v1g1	9.36341e-05	0.999906	1.16139	2512.71	2163.49	0.215852
ENSMUST00000142546.7	Lrp1b	9.50176e-05	0.999905	0.761222	496.309	652.172	-0.393611
ENSMUST00000081980.6	Med9	9.82829e-05	0.999902	0.8652	978.863	1131.42	-0.208894
ENSMUST00000028916.14	Sec23b	9.84715e-05	0.999902	1.47591	1199.12	812.275	0.561603
ENSMUST00000107788.7	Cacna1g	9.8499e-05	0.999902	4.65528	264.473	56.3563	2.21887
ENSMUST00000097709.10	Idh1	0.000100877	0.999899	1.27698	1637.92	1282.53	0.352735
ENSMUST00000103148.7	Pcgf2	0.000101911	0.999898	1.30955	416.186	317.671	0.389072
ENSMUST00000034537.7	St3gal4	0.000104286	0.999896	0.772982	439.113	568.168	-0.371493
ENSMUST00000182912.1	Anapc16	0.000105289	0.999895	0.416969	21.0574	51.3115	-1.26199
ENSMUST00000226468.1	Pde1b	0.000106482	0.999894	0.674039	321.779	477.669	-0.569096
ENSMUST00000164207.9	Fgfr3	0.000107917	0.999892	0.837257	910.933	1088.11	-0.256258
ENSMUST00000186868.1	Apbb1	0.000108423	0.999892	3.50198	171.424	48.5365	1.80817
ENSMUST00000112330.7	Slmap	0.000110178	0.99989	0.806816	950.505	1178.23	-0.309688
ENSMUST00000170628.1	Serpina3g	0.000112118	0.999888	2.66943	44.5057	16.3098	1.41653
ENSMUST00000160287.1	Gm3555	0.000113645	0.999886	0.265895	9.40298	36.9639	-1.91107
ENSMUST00000041080.5	Fzd8	0.000114033	0.999886	1.4818	230.359	155.358	0.567347
ENSMUST00000117597.1	Fbxo7	0.000115757	0.999884	0.419879	107.143	255.977	-1.25196
ENSMUST00000098496.8	Erich3	0.000119245	0.999881	0.734552	516.419	703.161	-0.445064
ENSMUST00000171835.8	Scn3b	0.00012039	0.99988	0.745782	2717.35	3643.82	-0.423173
ENSMUST00000216863.1	Actn4	0.000120409	0.99988	1.21902	1078.88	884.935	0.285726
ENSMUST00000172450.2	Pafah1b2	0.000122121	0.999878	1.06681	6783.85	6358.99	0.0933032
ENSMUST00000023448.12	Aifm3	0.000122761	0.999877	0.82321	647.1	786.194	-0.280667
ENSMUST00000162391.1	Far2os1	0.000122984	0.999877	6.33154	22.3168	3.26224	2.66256
ENSMUST00000164891.7	Dusp14	0.000123738	0.999876	5.20637	501.544	95.8645	2.38028
ENSMUST00000091789.10	Mbp	0.000128154	0.999872	0.895821	2287.45	2553.5	-0.158718
ENSMUST00000190050.1	Gm28539	0.000129692	0.99987	3.97054	65.5426	16.0736	1.98933
ENSMUST00000225323.1	Psd	0.000130249	0.99987	0.702722	1265.08	1800.5	-0.508974
ENSMUST00000001920.12	Aif1l	0.000130339	0.99987	0.655333	219.287	334.783	-0.609701
ENSMUST00000107651.8	Slc44a1	0.000130424	0.99987	0.863208	1461.3	1692.92	-0.21222
ENSMUST00000111891.3	Arhgdib	0.000133962	0.999866	2.8555	79.9975	27.6385	1.51374
ENSMUST00000028016.15	Prrc2c	0.000134952	0.999865	1.151	3360.63	2919.69	0.202882
ENSMUST00000067476.8	Spcs3	0.000135268	0.999865	0.834873	1786.49	2139.89	-0.260372
ENSMUST00000112949.7	Raf1	0.000136967	0.999863	0.39235	138.22	353.184	-1.34979
ENSMUST00000156290.8	Ttc28	0.000137618	0.999862	1.36973	816.97	596.29	0.453889
ENSMUST00000027945.5	Tatdn3	0.000138023	0.999862	0.407144	63.246	156.185	-1.29639
ENSMUST00000166744.7	Ppard	0.000138941	0.999861	10.5832	49.1434	4.11865	3.4037
ENSMUST00000106403.7	Kdm4a	0.000142626	0.999857	0.701378	356.612	508.692	-0.511737
ENSMUST00000116440.8	Eef1d	0.00014502	0.999855	0.556677	225.638	405.792	-0.845088
ENSMUST00000022304.9	Thrb	0.000152618	0.999847	0.847322	921.69	1087.83	-0.239018
ENSMUST00000007959.13	Rhoa	0.000155447	0.999845	1.09333	5344.35	4888.12	0.128727
ENSMUST00000047534.11	Fam168b	0.000163521	0.999836	0.875903	5917.62	6756.1	-0.191158
ENSMUST00000043616.6	Zyg11b	0.000167615	0.999832	1.16576	9065.31	7776.23	0.221276
ENSMUST00000119733.1	Gm13509	0.000168368	0.999832	1.14652	1853.1	1616.21	0.197255
ENSMUST00000131345.7	4933431E20Rik	0.000173914	0.999826	0.831511	3155.88	3795.42	-0.266192
ENSMUST00000168566.2	Zmat3	0.000175413	0.999825	0.773907	1550.76	2003.98	-0.369768
ENSMUST00000172165.7	43710	0.000177651	0.999822	7.85586	674.679	85.3763	2.97377
ENSMUST00000032066.12	Tgfa	0.000179551	0.99982	0.636311	888.326	1396.23	-0.652196
ENSMUST00000110489.8	4930447C04Rik	0.000180929	0.999819	4.83991	73.9278	14.8147	2.27498
ENSMUST00000097352.9	Pknox1	0.000183171	0.999817	1.25655	534.273	425.072	0.329469
ENSMUST00000163242.1	Atxn10	0.000183821	0.999816	1.15796	10949.4	9455.79	0.211581
ENSMUST00000100844.5	Anxa7	0.00018604	0.999814	0.822109	2308.13	2807.69	-0.282598
ENSMUST00000224385.1	Nedd4l	0.000191	0.999809	0.13501	1.76314	16.7733	-2.88887
ENSMUST00000203030.2	Wnk1	0.000195035	0.999805	0.814433	1976.04	2426.41	-0.296132
ENSMUST00000029635.13	Gucy1b3	0.000195471	0.999805	0.872508	4092.15	4690.19	-0.19676
ENSMUST00000021377.4	Cdkl1	0.000200219	0.9998	0.661552	228.959	346.253	-0.596073
ENSMUST00000064391.11	Cpne8	0.000203765	0.999796	0.633331	558.976	882.932	-0.658969
ENSMUST00000156177.8	Ntng1	0.000205239	0.999795	0.503107	252.31	502.075	-0.991062
ENSMUST00000163821.1	Shtn1	0.000209256	0.999791	1.29299	1604.81	1241.03	0.370711
ENSMUST00000040912.8	Anln	0.000213301	0.999787	0.812625	898.913	1106.26	-0.299338
ENSMUST00000205287.1	Tsen34	0.00021377	0.999786	3.71044	32.3748	8.30188	1.89159
ENSMUST00000160810.1	Ecel1	0.000223666	0.999776	8.65242	463.942	53.1073	3.1131
ENSMUST00000052172.6	Cxcr4	0.000230055	0.99977	2.36351	132.877	56.0268	1.24093
ENSMUST00000131769.7	Pde4a	0.000232977	0.999767	2.16681	106.393	48.7889	1.11557
ENSMUST00000034754.11	Bnip2	0.000233831	0.999766	0.676253	224.33	332.002	-0.564364
ENSMUST00000029771.12	F3	0.000234959	0.999765	0.796415	1137.81	1428.81	-0.328407
ENSMUST00000194701.5	Rhoa	0.000236235	0.999764	2.16873	60.7918	27.7187	1.11685
ENSMUST00000054174.7	Cyp4f14	0.000237163	0.999763	0.629158	148.33	236.1	-0.668505
ENSMUST00000020530.11	Nprl3	0.000237847	0.999762	1.2965	504.79	389.214	0.374626
ENSMUST00000109279.2	Slc13a3	0.000246481	0.999754	1.77259	305.098	171.867	0.82586
ENSMUST00000123330.2	Gad1	0.000249918	0.99975	1.77098	322.713	182.077	0.82455
ENSMUST00000043338.9	Sft2d2	0.000251589	0.999748	0.822236	893.154	1086.32	-0.282376
ENSMUST00000048112.12	Sgsm1	0.000257484	0.999743	1.34207	3244.86	2417.65	0.424464
ENSMUST00000215998.1	Stt3a	0.000262234	0.999738	1.81541	106.303	58.2956	0.860299
ENSMUST00000055738.11	Tsc22d3	0.000270921	0.999729	0.629179	716.436	1139.03	-0.668458
ENSMUST00000027697.11	Cdk18	0.00027299	0.999727	2.97557	2212.52	743.341	1.57317
ENSMUST00000142669.7	Spout1	0.000274181	0.999726	0.62518	95.608	153.276	-0.677657
ENSMUST00000097974.8	Nkx6-2	0.000278337	0.999722	0.598779	116.313	194.474	-0.739904
ENSMUST00000025842.6	Gal	0.000278693	0.999721	5.33776	97.6359	18.0382	2.41624
ENSMUST00000027297.10	Plekhb2	0.000279981	0.99972	1.13246	7485.6	6609.98	0.179464
ENSMUST00000106731.2	Lrp8	0.000280691	0.999719	1.44312	4035.75	2796.45	0.529191
ENSMUST00000210530.1	Ankrd10	0.000281208	0.999719	1.65243	214.86	129.798	0.724585
ENSMUST00000228797.1	Ralgapa2	0.000283736	0.999716	0.547591	79.8921	146.376	-0.868828
ENSMUST00000193547.5	Ncam1	0.000283924	0.999716	1.18792	5240.23	4411.18	0.248434
ENSMUST00000208402.1	Prss23	0.000292436	0.999708	4.84418	72.0854	14.4208	2.27625
ENSMUST00000052629.12	Igsf9	0.000293419	0.999707	1.85357	196.615	105.806	0.89031
ENSMUST00000194134.5	Mme	0.00029685	0.999703	0.643266	146.994	228.697	-0.636513
ENSMUST00000177013.7	Dlgap4	0.000298995	0.999701	11.7642	24.3736	1.54144	3.55634
ENSMUST00000109221.8	B4galt5	0.000302199	0.999698	1.23576	2007.47	1624.43	0.305394
ENSMUST00000186213.6	Tuba4a	0.000302458	0.999698	0.783915	1049.08	1338.35	-0.35123
ENSMUST00000115181.8	Telo2	0.000306595	0.999693	1.89843	585.749	308.27	0.924806
ENSMUST00000147454.7	Grip1	0.000308196	0.999692	2.50703	317.587	126.33	1.32598
ENSMUST00000077128.12	Arhgap12	0.000309879	0.99969	0.745307	1069.74	1435.51	-0.424094
ENSMUST00000142459.1	Frzb	0.00031198	0.999688	0.432708	27.4861	64.2812	-1.20854
ENSMUST00000137029.1	Fbln2	0.000313766	0.999686	2.28835	181.64	79.0494	1.19431
ENSMUST00000133827.7	Ssbp3	0.000315748	0.999684	2.05512	337.234	163.797	1.03922
ENSMUST00000041761.6	Prss23	0.000317251	0.999683	3.67441	377.948	102.616	1.87751
ENSMUST00000021347.11	Sel1l	0.000323971	0.999676	1.15134	6550.45	5689.35	0.20331
ENSMUST00000183463.7	Elf2	0.000328112	0.999672	2.07843	257.035	123.367	1.05549
ENSMUST00000053288.5	Cdr2l	0.000331767	0.999668	0.700326	731.038	1043.99	-0.513901
ENSMUST00000037401.9	Phf20	0.000332941	0.999667	0.915746	3422.89	3737.87	-0.126981
ENSMUST00000031668.9	Col1a2	0.000333777	0.999666	1.9395	407.222	209.8	0.955687
ENSMUST00000069580.11	Rnf181	0.000348645	0.999651	1.1521	2050.4	1779.63	0.204266
ENSMUST00000186096.6	Lmbrd1	0.000351572	0.999648	46.8351	26.5694	0	5.54952
ENSMUST00000151334.1	Hdac7	0.000361663	0.999638	0.664126	180.81	272.546	-0.590471
ENSMUST00000102920.3	Gck	0.000366699	0.999633	0.418605	56.7811	136.449	-1.25634
ENSMUST00000185403.6	Dnajb2	0.000366972	0.999633	3.2833	27.5767	7.99596	1.71515
ENSMUST00000145819.7	Cse1l	0.000371316	0.999629	1.50801	302.672	200.514	0.592646
ENSMUST00000027726.13	Cyb5r1	0.000373003	0.999627	1.36317	870.09	638.13	0.446966
ENSMUST00000034051.6	Ufsp2	0.000383306	0.999617	1.21095	1229	1014.81	0.276134
ENSMUST00000110065.7	Gpr68	0.000384605	0.999615	4.01563	350.495	86.8473	2.00563
ENSMUST00000105367.7	Atp5d	0.000385711	0.999614	1.72985	170.018	98.0402	0.790648
ENSMUST00000030356.9	Lrp8	0.00039891	0.999601	1.65058	402.496	243.623	0.722974
ENSMUST00000172356.7	Thsd7a	0.000406194	0.999594	0.623736	1019.8	1635.18	-0.680992
ENSMUST00000213002.1	Gm35934	0.000412211	0.999588	0.283589	14.962	53.5469	-1.81813
ENSMUST00000211371.1	6330420H09Rik	0.000414697	0.999585	0.44802	61.2987	137.205	-1.15837
ENSMUST00000103142.11	Acss2	0.000415118	0.999585	1.92317	177.393	91.9618	0.943487
ENSMUST00000045779.5	Ttyh2	0.000416393	0.999584	0.841997	1055.32	1253.42	-0.248114
ENSMUST00000096441.3	Morc2a	0.000421862	0.999578	1.18359	1083.12	915.019	0.243174
ENSMUST00000127989.2	Gm16001	0.000422448	0.999578	3.48823	21.2647	5.68265	1.8025
ENSMUST00000004326.3	Plxna3	0.000432225	0.999568	0.802941	905.904	1128.37	-0.316634
ENSMUST00000153348.7	Susd4	0.000437994	0.999562	1.33078	420.704	315.989	0.412273
ENSMUST00000144187.1	Pnck	0.000440583	0.999559	0.585324	55.7509	95.6586	-0.772693
ENSMUST00000037504.6	Ints14	0.000451801	0.999548	1.99856	175.395	87.471	0.998963
ENSMUST00000003850.7	Itpkc	0.000452479	0.999548	1.62561	451.102	277.368	0.700982
ENSMUST00000081713.10	Ncoa2	0.000457542	0.999542	0.686477	148.226	216.187	-0.542717
ENSMUST00000023788.6	Krt6a	0.000458894	0.999541	51.2057	50.5143	0.658201	5.67823
ENSMUST00000176114.7	Zfp536	0.000458958	0.999541	1.5604	141.713	90.6099	0.641916
ENSMUST00000114479.1	Atp2b3	0.000462627	0.999537	0.882312	3757.88	4259.2	-0.18064
ENSMUST00000123391.7	Camk2b	0.000471161	0.999529	0.652304	149.494	229.488	-0.616384
ENSMUST00000067778.7	Gcnt2	0.000471794	0.999528	1.46622	416.075	283.59	0.552101
ENSMUST00000024702.3	Paqr4	0.000482805	0.999517	0.8455	1491.24	1763.79	-0.242123
ENSMUST00000098414.4	Svip	0.000483663	0.999516	0.841829	1548.46	1839.46	-0.248401
ENSMUST00000055884.7	Htr5b	0.000486699	0.999513	0.666279	135.455	203.458	-0.585802
ENSMUST00000000759.8	Chmp1a	0.000502067	0.999498	1.09283	3161.28	2892.72	0.128068
ENSMUST00000099145.5	Dlgap4	0.000503382	0.999497	1.25266	2386.39	1904.95	0.324991
ENSMUST00000051389.9	Synm	0.000515572	0.999484	0.60406	808.173	1338.28	-0.727235
ENSMUST00000099356.9	Arrdc3	0.000515667	0.999484	0.740333	1081.62	1461.2	-0.433755
ENSMUST00000145484.1	Atxn7l3	0.00053875	0.999461	1.57509	162.155	102.738	0.655434
ENSMUST00000150682.2	Anapc4	0.000539408	0.999461	5.35938	21.5781	3.55471	2.42207
ENSMUST00000077709.10	Tmem268	0.000540738	0.999459	1.75142	295.613	168.536	0.808525
ENSMUST00000085913.10	Atp1a2	0.000557462	0.999443	0.888168	30646.5	34505.3	-0.171095
ENSMUST00000042986.9	Plcl1	0.000561433	0.999439	0.862143	1060.76	1230.42	-0.214001
ENSMUST00000168120.2	Acot1	0.000565332	0.999435	1.64551	270.959	164.534	0.718539
ENSMUST00000057195.16	Nup62	0.000567698	0.999432	1.28279	552.1	430.261	0.35929
ENSMUST00000003509.9	St8sia6	0.000573651	0.999426	0.595587	131.579	221.134	-0.747616
ENSMUST00000184876.7	Sema4a	0.000574895	0.999425	3.01933	35.2936	11.3016	1.59423
ENSMUST00000141692.7	Snph	0.000594805	0.999405	0.364894	16.4214	46.0122	-1.45445
ENSMUST00000038521.13	Tsen34	0.000603175	0.999397	0.581246	110.656	190.795	-0.782779
ENSMUST00000026357.11	Jph3	0.000603613	0.999396	0.814645	6308.63	7744.1	-0.295756
ENSMUST00000155954.2	B230217C12Rik	0.000604673	0.999395	0.767176	610.346	795.752	-0.382371
ENSMUST00000108405.1	Tmem91	0.000612161	0.999388	2.57265	159.374	61.5951	1.36326
ENSMUST00000146247.1	Kif5c	0.000615454	0.999385	10.8108	16.7543	1.02373	3.4344
ENSMUST00000127726.1	Rev3l	0.000620296	0.99938	1.5364	163.364	106.127	0.619553
ENSMUST00000111644.1	Stk38l	0.000625933	0.999374	10.5827	66.8998	5.79671	3.40364
ENSMUST00000035237.11	Usp4	0.000643465	0.999357	1.1481	2653.36	2311.02	0.199243
ENSMUST00000028252.13	Grb14	0.000653104	0.999347	0.609777	512.406	840.532	-0.713647
ENSMUST00000174459.1	Gypc	0.000653148	0.999347	0.524893	40.8833	78.4136	-0.929905
ENSMUST00000151001.1	Id3	0.00068061	0.999319	1.92187	75.9859	39.3769	0.942509
ENSMUST00000002699.5	Akap8	0.000684004	0.999316	0.888771	2985.06	3358.67	-0.170116
ENSMUST00000169713.8	Plce1	0.00068757	0.999312	1.44981	325.171	224.106	0.535861
ENSMUST00000195654.1	Cacybp	0.000688379	0.999312	0.447498	20.3302	46.1464	-1.16005
ENSMUST00000111160.8	Akt3	0.000698538	0.999301	0.830143	4692.18	5652.37	-0.268568
ENSMUST00000108437.7	Serpinf2	0.000699335	0.999301	6.16392	50.4023	7.69136	2.62385
ENSMUST00000174882.7	Hnrnpl	0.000708056	0.999292	1.65572	244.728	147.578	0.727454
ENSMUST00000020885.12	Sypl	0.000708424	0.999292	0.845544	777.849	920.045	-0.242048
ENSMUST00000147659.1	Tenm4	0.000720772	0.999279	1.78781	85.4032	47.5143	0.838192
ENSMUST00000176354.1	Pkib	0.000762077	0.999238	0.122762	1.19207	13.8526	-3.02606
ENSMUST00000089832.4	Gmnc	0.000765731	0.999234	0.37309	71.0863	191.058	-1.42241
ENSMUST00000028949.15	Nsfl1c	0.000767457	0.999233	1.55162	1116	719.045	0.633775
ENSMUST00000177608.7	Sulf1	0.000770633	0.999229	2.27468	117.19	51.1946	1.18566
ENSMUST00000026672.7	Pde8a	0.000786588	0.999213	0.74671	480.767	643.953	-0.42138
ENSMUST00000203647.1	Aak1	0.000789033	0.999211	1.38954	307.538	221.229	0.474611
ENSMUST00000107601.7	Arhgap23	0.000808459	0.999192	1.43937	1594.31	1107.47	0.525439
ENSMUST00000221717.1	Lyst	0.000824477	0.999176	0.443298	45.6652	103.433	-1.17365
ENSMUST00000029686.3	Hcn3	0.000830275	0.99917	1.36227	670.18	491.868	0.446017
ENSMUST00000126308.1	Mfap4	0.000835963	0.999164	3.62023	60.872	16.3949	1.85608
ENSMUST00000079788.5	Mkx	0.000847274	0.999153	0.512838	201.442	393.117	-0.963424
ENSMUST00000135772.1	Adi1	0.000854915	0.999145	0.235671	71.5745	305.585	-2.08515
ENSMUST00000117513.7	Slc29a3	0.000861724	0.999138	0.830923	592.492	713.121	-0.267212
ENSMUST00000117507.8	Ecm1	0.000864921	0.999135	3.92649	212.765	53.755	1.97324
ENSMUST00000022601.6	Wbp4	0.000888787	0.999111	1.23087	1482.9	1204.7	0.299677
ENSMUST00000133638.7	43712	0.000892684	0.999107	0.631104	236.505	375.086	-0.66405
ENSMUST00000090561.9	Psrc1	0.000903044	0.999097	0.477068	93.0007	195.578	-1.06773
ENSMUST00000198948.4	Mllt11	0.000903687	0.999096	1.51259	1775.77	1173.79	0.597022
ENSMUST00000093113.4	Adamts18	0.000913649	0.999086	2.7286	129.957	47.2604	1.44816
ENSMUST00000111303.1	Dgkz	0.000931719	0.999068	1.7585	845.84	480.751	0.814346
ENSMUST00000089824.10	Hrasls	0.00093788	0.999062	0.758968	285.293	375.995	-0.397889
ENSMUST00000109177.7	Atp9a	0.000939979	0.99906	0.83826	6643.79	7925.81	-0.254531
ENSMUST00000198586.1	Gm32585	0.000943946	0.999056	6.64972	37.331	5.34911	2.73329
ENSMUST00000095757.3	Nat8f4	0.000949899	0.99905	0.742231	386.723	521.144	-0.430059
ENSMUST00000044705.11	Vstm2b	0.000951544	0.999048	1.5475	461.1	297.845	0.629943
ENSMUST00000019608.6	Ptger1	0.000961586	0.999038	0.720214	146.596	203.675	-0.473503
ENSMUST00000221454.1	Jag2	0.000967967	0.999032	0.317683	8.24886	27.2107	-1.65434
ENSMUST00000105802.7	Htr6	0.000968376	0.999032	1.44291	208.252	144.225	0.528983
ENSMUST00000140471.7	Trpm2	0.000978887	0.999021	0.631671	73.086	115.898	-0.662754
ENSMUST00000207017.1	Pak1	0.00100498	0.998995	0.547578	89.5619	164.039	-0.868863
ENSMUST00000164756.3	Eid1	0.00102787	0.998972	0.870307	6269.14	7203.41	-0.200403
ENSMUST00000107124.9	Elavl2	0.00102833	0.998972	1.59145	289.634	181.778	0.670343
ENSMUST00000126281.7	Art3	0.00103144	0.998969	0.330388	14.1977	44.1476	-1.59777
ENSMUST00000027339.13	Smap1	0.00103303	0.998967	1.10671	2697.75	2437.6	0.146277
ENSMUST00000009617.9	Kcnc4	0.00103304	0.998967	1.35704	3121.08	2299.83	0.440464
ENSMUST00000045487.3	Rhou	0.00104194	0.998958	0.834151	1154.66	1384.3	-0.26162
ENSMUST00000109621.9	Tox3	0.00104789	0.998952	0.619681	193.571	312.577	-0.690403
ENSMUST00000184347.1	Gm27517	0.00105529	0.998945	12.4182	8.48644	0.150393	3.63439
ENSMUST00000159610.7	Cacna1h	0.00106804	0.998932	1.57862	9594.09	6077.32	0.658661
ENSMUST00000032108.10	Wdr54	0.00107497	0.998925	1.89587	131.521	69.0987	0.922861
ENSMUST00000163764.7	Jade1	0.00109077	0.998909	0.547884	173.053	316.334	-0.868057
ENSMUST00000057486.8	Ankrd46	0.00109917	0.998901	0.893753	7155.34	8006.01	-0.162052
ENSMUST00000041065.13	Myo1d	0.00110373	0.998896	0.75822	463.412	611.291	-0.399311
ENSMUST00000025696.4	Ak3	0.00110477	0.998895	0.883248	2317.07	2623.4	-0.179109
ENSMUST00000038665.5	Ptchd1	0.00111239	0.998888	1.92081	172.711	89.7555	0.941712
ENSMUST00000041401.10	Herc3	0.00112172	0.998878	1.18832	7138.61	6007.25	0.248926
ENSMUST00000121046.1	Tpt1-ps3	0.00113315	0.998867	1.40793	383.554	272.255	0.493579
ENSMUST00000034150.9	Gab1	0.00114266	0.998857	0.844864	829.925	982.425	-0.243209
ENSMUST00000179323.1	Lsm10	0.00114625	0.998854	11.6782	22.0583	1.35881	3.54574
ENSMUST00000009358.8	Mymk	0.00114669	0.998853	3.4388	30.6599	8.50476	1.7819
ENSMUST00000049575.7	Cltb	0.00117881	0.998821	1.26694	3502.98	2764.8	0.341343
ENSMUST00000183174.1	Bgn	0.00118344	0.998817	3.25306	32.8673	9.702	1.7018
ENSMUST00000020485.9	Glt8d2	0.00118829	0.998812	1.85094	648.496	350.206	0.88826
ENSMUST00000044530.2	Smyd4	0.00119232	0.998808	1.45463	605.367	416.062	0.540649
ENSMUST00000163011.1	Lamc1	0.0011994	0.998801	0.347675	9.44747	28.2609	-1.52419
ENSMUST00000136289.1	Fus	0.00121538	0.998785	0.834309	796.692	955.027	-0.261345
ENSMUST00000122885.7	Tcirg1	0.00121696	0.998783	4.57193	18.2534	3.53961	2.1928
ENSMUST00000101562.10	Asap2	0.00123212	0.998768	0.836837	1052.79	1258.17	-0.256982
ENSMUST00000003360.9	Car11	0.0012322	0.998768	0.746863	2863.23	3833.8	-0.421085
ENSMUST00000139385.7	Dpy19l4	0.00124241	0.998758	0.682011	132.749	194.914	-0.552133
ENSMUST00000037915.8	Msl1	0.00124497	0.998755	0.907065	3391.91	3739.47	-0.140723
ENSMUST00000048630.6	Crtac1	0.00125533	0.998745	1.28105	4386.75	3424.26	0.357331
ENSMUST00000026896.9	St8sia2	0.00125584	0.998744	1.607	213.153	132.523	0.684366
ENSMUST00000072289.11	Flot2	0.00126862	0.998731	0.739834	1501.34	2029.49	-0.434727
ENSMUST00000035232.12	Klhdc8b	0.00129735	0.998703	1.37691	425.02	308.517	0.461439
ENSMUST00000084615.9	Cacng3	0.00131404	0.998686	0.816511	1701.08	2083.43	-0.292456
ENSMUST00000212275.1	Tk2	0.00131499	0.998685	4.31347	23.3597	4.97023	2.10885
ENSMUST00000214859.1	Tln2	0.00134205	0.998658	0.561187	213.055	380.103	-0.833446
ENSMUST00000150485.1	Rpl22	0.00137494	0.998625	0.471445	20.0239	42.8489	-1.08484
ENSMUST00000031731.13	Pcolce	0.00137714	0.998623	2.27047	178.889	78.4651	1.18299
ENSMUST00000110084.3	Bicd2	0.00138794	0.998612	0.778419	712.728	915.774	-0.361382
ENSMUST00000032383.13	Sspn	0.00139327	0.998607	0.700032	308.928	441.554	-0.514507
ENSMUST00000178228.2	C2cd4c	0.00140956	0.99859	2.29002	495.087	215.867	1.19536
ENSMUST00000137217.7	Shroom2	0.00142072	0.998579	0.773629	1845.7	2385.93	-0.370287
ENSMUST00000026084.3	Slc18a2	0.00142893	0.998571	1.39359	375.855	269.614	0.47881
ENSMUST00000034611.14	Phldb1	0.00142953	0.99857	0.801731	766.377	956.046	-0.31881
ENSMUST00000200692.3	Mapre3	0.0014412	0.998559	1.34441	2260.27	1681.08	0.426977
ENSMUST00000163739.2	Ap3m2	0.00144354	0.998556	1.43816	490.378	340.8	0.524222
ENSMUST00000150404.8	Egfl7	0.00145028	0.99855	7.2088	62.6756	8.19506	2.84976
ENSMUST00000148843.9	Hnrnpr	0.00145591	0.998544	0.854327	1001.8	1172.68	-0.227139
ENSMUST00000039939.6	Szrd1	0.00148623	0.998514	2.49158	139.513	55.6469	1.31706
ENSMUST00000114780.7	Stxbp5l	0.00148639	0.998514	0.321872	27.8284	87.6794	-1.63544
ENSMUST00000115010.8	Ucma	0.00151851	0.998481	2.93042	84.8257	28.5647	1.55111
ENSMUST00000177811.7	Enah	0.00153799	0.998462	3.27138	287.706	87.5439	1.7099
ENSMUST00000197205.4	Rnf13	0.00154069	0.998459	0.600231	79.9226	133.539	-0.73641
ENSMUST00000042312.13	Trafd1	0.00155777	0.998442	1.29413	1039.84	803.373	0.371984
ENSMUST00000077080.8	St7	0.00156195	0.998438	0.310963	40.6752	132.089	-1.68519
ENSMUST00000161254.8	Nwd1	0.00156339	0.998437	0.751015	1967.43	2619.88	-0.413086
ENSMUST00000036340.11	Fancd2	0.0015778	0.998422	1.54094	238.104	154.316	0.623807
ENSMUST00000091609.10	Cltb	0.00158277	0.998417	1.31994	2111.99	1599.98	0.400471
ENSMUST00000170491.7	Slc39a7	0.00158472	0.998415	1.20692	832.362	689.558	0.27133
ENSMUST00000059193.6	F2r	0.00159325	0.998407	1.51482	351.749	232.099	0.599149
ENSMUST00000088696.11	Zfp945	0.00159532	0.998405	0.473762	87.1334	184.562	-1.07777
ENSMUST00000028815.14	Slc23a2	0.00160842	0.998392	1.29446	6940.35	5361.5	0.372353
ENSMUST00000152065.7	Adcy3	0.00161566	0.998384	1.39881	514.393	367.57	0.484204
ENSMUST00000133154.6	Fnip2	0.001618	0.998382	0.780203	568.78	729.179	-0.358079
ENSMUST00000028926.12	Napb	0.00162265	0.998377	1.09703	20988.3	19131.9	0.133599
ENSMUST00000043884.5	Lrrn3	0.00163924	0.998361	0.730909	2270.29	3106.23	-0.452237
ENSMUST00000197674.1	Gm42875	0.0016546	0.998345	6.65133	33.6706	4.79741	2.73364
ENSMUST00000016309.15	Tmbim1	0.00168333	0.998317	0.805795	609.575	756.629	-0.311516
ENSMUST00000047627.13	Gpbp1	0.00169574	0.998304	1.10752	2792.26	2521.13	0.147331
ENSMUST00000159954.7	Man2c1	0.00171857	0.998281	0.719828	160.595	223.328	-0.474275
ENSMUST00000068698.14	Mobp	0.00172376	0.998276	0.625113	466.996	747.247	-0.677812
ENSMUST00000174353.1	Emx2	0.00174021	0.99826	0.647912	110.268	170.505	-0.62613
ENSMUST00000123440.1	Rap1gap2	0.00174254	0.998257	1.16237	2563.55	2205.36	0.217074
ENSMUST00000140702.2	Fbxl12	0.00175696	0.998243	0.667225	98.9291	148.559	-0.583755
ENSMUST00000103110.9	Atp6v0a1	0.00176672	0.998233	0.603102	87.5996	145.63	-0.729526
ENSMUST00000033541.4	Fundc2	0.00178188	0.998218	0.767419	921.773	1201.23	-0.381914
ENSMUST00000187923.1	6330403L08Rik	0.00180167	0.998198	0.733852	222.093	302.851	-0.446438
ENSMUST00000020435.10	Jsrp1	0.0018047	0.998195	1.87256	97.8412	51.9799	0.90501
ENSMUST00000117295.1	Rps2-ps13	0.0018048	0.998195	0.309155	6.66675	22.8598	-1.6936
ENSMUST00000195433.5	Cep170	0.00180851	0.998191	1.53651	130.871	84.9715	0.619658
ENSMUST00000036069.6	Mamdc2	0.00182495	0.998175	2.58874	222.119	85.6108	1.37225
ENSMUST00000098938.8	Arhgef7	0.00185964	0.99814	1.21339	1456.53	1200.28	0.279041
ENSMUST00000141113.1	Gse1	0.0018645	0.998135	1.47157	293.106	198.994	0.557352
ENSMUST00000106576.2	Vav3	0.00187092	0.998129	0.551509	94.7184	172.216	-0.858545
ENSMUST00000146385.8	Ccdc85a	0.00189691	0.998103	0.777904	795.383	1022.63	-0.362335
ENSMUST00000155324.8	Aloxe3	0.00191308	0.998087	0.645772	96.6344	149.825	-0.630904
ENSMUST00000142951.8	Nup210	0.0019328	0.998067	4.24936	61.8031	14.1008	2.08725
ENSMUST00000197182.4	Dhx30	0.00193727	0.998063	0.262644	4.70218	19.5307	-1.92882
ENSMUST00000177194.2	Uchl1	0.00195323	0.998047	1.52412	264.884	173.687	0.607979
ENSMUST00000156844.7	Gm14419	0.00195427	0.998046	1.8127	120.379	66.1488	0.858143
ENSMUST00000033941.6	Plat	0.00196013	0.99804	1.34077	1603.81	1196.11	0.423059
ENSMUST00000021558.7	Galnt16	0.00196177	0.998038	0.788505	6928.69	8787.29	-0.342809
ENSMUST00000112835.7	Amot	0.0019658	0.998034	0.816032	450.696	552.432	-0.293302
ENSMUST00000185675.6	Glce	0.00196721	0.998033	1.42984	467.091	326.499	0.515853
ENSMUST00000130750.2	Lpin2	0.00198322	0.998017	1.88957	66.3519	34.9571	0.918061
ENSMUST00000090165.4	Slc7a4	0.001987	0.998013	1.58207	230.727	145.625	0.661817
ENSMUST00000065927.5	Tnfaip6	0.00200009	0.998	0.701236	131.191	187.218	-0.512028
ENSMUST00000168142.7	Trf	0.00200961	0.99799	0.39867	77.5309	195.348	-1.32673
ENSMUST00000120356.7	Araf	0.00202771	0.997972	1.14014	3757.04	3295.19	0.189206
ENSMUST00000155907.1	Adamts20	0.00203528	0.997965	0.711713	480.729	675.589	-0.490633
ENSMUST00000070256.8	Kcnq3	0.00207695	0.997923	0.759168	5862.26	7722.05	-0.397509
ENSMUST00000209410.1	Bcat2	0.00209823	0.997902	0.277763	8.00864	30.3399	-1.84808
ENSMUST00000058007.6	Rxfp3	0.00212303	0.997877	1.78247	338.873	189.978	0.833877
ENSMUST00000150042.7	Mrpl48	0.00216027	0.99784	0.824568	836.322	1014.33	-0.27829
ENSMUST00000078525.6	Rnf150	0.00221083	0.997789	1.08336	3368.1	3108.93	0.115508
ENSMUST00000134004.2	Ank	0.00222889	0.997771	0.68958	728.876	1057.25	-0.53621
ENSMUST00000226091.1	Celf4	0.00229564	0.997704	2.33668	49.4797	20.8436	1.22446
ENSMUST00000006912.11	Pip4k2a	0.00231253	0.997687	0.884251	2699.89	3053.35	-0.177472
ENSMUST00000089236.10	Pnma2	0.00231687	0.997683	0.748275	1505.58	2012.18	-0.418359
ENSMUST00000114516.7	Dzip3	0.00234862	0.997651	1.40062	496.702	354.465	0.486064
ENSMUST00000006559.13	Tpbg	0.00235355	0.997646	3.88844	83.2419	20.9769	1.95919
ENSMUST00000200821.1	Ociad2	0.00235597	0.997644	3.32648	57.7885	17.1381	1.73399
ENSMUST00000133504.1	Peli3	0.00236991	0.99763	11.4494	10.6272	0.399152	3.51719
ENSMUST00000189486.6	Dock10	0.00238227	0.997618	0.6756	413.147	611.687	-0.565759
ENSMUST00000119299.7	Ogt	0.0024027	0.997597	1.47505	371.226	251.484	0.560764
ENSMUST00000142595.7	Foxred1	0.00241305	0.997587	4.20483	19.0288	4.08364	2.07205
ENSMUST00000171795.7	Prepl	0.0024251	0.997575	1.29707	1032.03	795.534	0.375254
ENSMUST00000063117.9	Gstz1	0.00242986	0.99757	0.873043	1073.68	1229.86	-0.195875
ENSMUST00000113979.9	Lancl1	0.0024466	0.997553	0.833757	3070.38	3682.7	-0.262301
ENSMUST00000108657.3	Trp53	0.00247762	0.997522	0.611384	95.2471	156.158	-0.70985
ENSMUST00000030539.9	Kif17	0.0024998	0.9975	1.62916	469.442	287.926	0.704128
ENSMUST00000210072.1	5830408C22Rik	0.00251147	0.997489	4.52619	134.542	29.4824	2.1783
ENSMUST00000054462.10	Tbc1d8	0.00251195	0.997488	1.58219	771.116	487.158	0.661927
ENSMUST00000038876.12	Emp3	0.00251249	0.997488	2.06342	55.6349	26.6638	1.04504
ENSMUST00000196446.4	Ube2d3	0.00255	0.99745	9.04977	58.3494	5.932	3.17788
ENSMUST00000212643.1	Carmil2	0.0026122	0.997388	0.776753	514.968	663.072	-0.364472
ENSMUST00000071457.11	Cib1	0.00261784	0.997382	2.28422	37.5489	16.1125	1.1917
ENSMUST00000106112.1	Bnip3	0.00262876	0.997371	0.829931	2193.9	2643.54	-0.268937
ENSMUST00000223020.1	Ttc7b	0.00266325	0.997337	0.8186	2946.62	3599.72	-0.28877
ENSMUST00000182450.7	Rbm25	0.00268149	0.997319	1.59341	231.505	145.073	0.672117
ENSMUST00000073892.5	Fxyd7	0.00268842	0.997312	0.723396	566.512	783.35	-0.467143
ENSMUST00000078757.7	Gal3st1	0.00272592	0.997274	0.482434	34.1329	71.3733	-1.0516
ENSMUST00000072744.14	Vipas39	0.0027266	0.997273	1.12111	1830.69	1632.86	0.164929
ENSMUST00000140907.7	Slc20a1	0.00273612	0.997264	1.97045	47.9976	24.0733	0.978522
ENSMUST00000142106.7	Dhodh	0.0027447	0.997255	5.59184	25.5008	4.08435	2.48332
ENSMUST00000197599.1	Kcnq2	0.00275494	0.997245	4.74049	25.7064	4.96534	2.24504
ENSMUST00000171537.1	Hmgcr	0.00275788	0.997242	6.31953	29.0746	4.11281	2.65982
ENSMUST00000046518.11	Itpk1	0.00277573	0.997224	1.39357	2751.51	1974.35	0.478781
ENSMUST00000106630.1	Sstr2	0.00281842	0.997182	2.38585	52.3891	21.6215	1.2545
ENSMUST00000092219.13	Tmpo	0.00282863	0.997171	2.1071	64.4426	30.2789	1.07526
ENSMUST00000055676.3	S1pr1	0.00286391	0.997136	0.81829	2557.88	3125.95	-0.289316
ENSMUST00000190638.6	Mag	0.00290372	0.997096	0.72198	335.597	465.051	-0.46997
ENSMUST00000140212.7	Homer3	0.00294636	0.997054	1.52274	167.081	109.525	0.606665
ENSMUST00000226161.1	Stk24	0.00296766	0.997032	2.73953	39.2975	13.9765	1.45393
ENSMUST00000066905.8	Chl1	0.00297635	0.997024	1.25494	8042.04	6408.21	0.327623
ENSMUST00000105590.7	Esr1	0.00302402	0.996976	1.60731	120.773	75.0132	0.684645
ENSMUST00000225884.1	Arhgef28	0.00303079	0.996969	1.24158	726.272	584.847	0.312175
ENSMUST00000106732.8	Lrp8	0.00303175	0.996968	2.25575	340.774	150.746	1.17361
ENSMUST00000081214.11	Wdr91	0.003052	0.996948	0.840945	693.399	824.658	-0.249917
ENSMUST00000081232.8	Plcg2	0.00306347	0.996937	0.71173	172.887	243.036	-0.490597
ENSMUST00000181535.8	Miat	0.00307341	0.996927	0.751968	24129.4	32088.5	-0.411257
ENSMUST00000224829.1	Ndst2	0.00307476	0.996925	0.375147	19.3926	52.6588	-1.41447
ENSMUST00000107377.9	Tnc	0.0031069	0.996893	2.20355	322.463	146.022	1.13983
ENSMUST00000072376.11	Rnf14	0.00313445	0.996866	1.14944	11370.2	9891.85	0.200929
ENSMUST00000171690.8	A830018L16Rik	0.00318588	0.996814	0.746003	469.395	629.41	-0.422746
ENSMUST00000166214.7	Wdr36	0.00321507	0.996785	1.21571	537.13	441.722	0.281799
ENSMUST00000126046.1	Ube2g1	0.00321633	0.996784	1.55347	128.31	82.4766	0.635496
ENSMUST00000133954.2	Jph4	0.00322523	0.996775	0.763772	715.483	936.879	-0.388786
ENSMUST00000049999.8	Spin2c	0.00324681	0.996753	0.714127	145.469	203.836	-0.485748
ENSMUST00000207594.1	Prcp	0.00326779	0.996732	0.499034	33.6646	68.0414	-1.00279
ENSMUST00000222298.1	Sipa1l1	0.00328513	0.996715	0.690051	390.26	565.813	-0.535225
ENSMUST00000091146.11	Rapgef1	0.00329122	0.996709	0.732343	480.673	656.56	-0.449408
ENSMUST00000102665.10	Mog	0.00331289	0.996687	0.697221	1191.34	1708.84	-0.520311
ENSMUST00000036796.7	Fstl4	0.00333037	0.99667	1.2392	525.349	423.88	0.309413
ENSMUST00000167417.4	Camk2d	0.00343801	0.996562	2.51266	36.8726	14.3258	1.32922
ENSMUST00000109910.8	Nf2	0.00345409	0.996546	1.14973	4439.32	3861.16	0.20129
ENSMUST00000136189.7	Tbc1d14	0.00350016	0.9965	0.202158	17.8622	90.6454	-2.30645
ENSMUST00000167493.8	Rnh1	0.00351516	0.996485	1.21248	818.302	674.8	0.277956
ENSMUST00000004134.10	Gstm5	0.00352748	0.996473	0.784487	3221.41	4106.55	-0.350178
ENSMUST00000123932.7	Samhd1	0.00353622	0.996464	0.710223	135.641	191.12	-0.493657
ENSMUST00000160696.7	Phc1	0.00354954	0.99645	0.807961	433.142	536.23	-0.307643
ENSMUST00000017443.13	Dnttip1	0.00356089	0.996439	1.27582	842.186	660.041	0.351426
ENSMUST00000122088.1	S1pr5	0.00356844	0.996432	0.771414	357.833	463.958	-0.374422
ENSMUST00000080336.3	Tmem268	0.00359094	0.996409	0.264933	39.7236	151.547	-1.9163
ENSMUST00000044521.13	Ahdc1	0.00365833	0.996342	1.29807	2173.52	1674.29	0.37637
ENSMUST00000036872.15	Wipi2	0.00368106	0.996319	0.894641	3535.56	3951.97	-0.160618
ENSMUST00000074541.5	Jazf1	0.00374991	0.99625	1.18169	940.969	796.201	0.240853
ENSMUST00000102514.3	Rtn4rl1	0.00375384	0.996246	1.44053	4527.24	3142.66	0.526603
ENSMUST00000212083.1	Fam192a	0.00377395	0.996226	2.91859	50.312	16.8574	1.54527
ENSMUST00000196695.4	Fubp1	0.00379245	0.996208	1.42248	908.281	638.346	0.508411
ENSMUST00000120351.1	Gm12312	0.00380482	0.996195	0.234498	3.97248	18.0334	-2.09235
ENSMUST00000111735.9	Tmem260	0.00383791	0.996162	0.81244	631.076	776.844	-0.299667
ENSMUST00000027153.5	Acadl	0.00385933	0.996141	0.812105	885.348	1090.26	-0.300262
ENSMUST00000037526.10	Tanc1	0.00388729	0.996113	1.61251	497.518	308.317	0.689306
ENSMUST00000182786.7	Anks1b	0.0039002	0.9961	0.347112	28.4534	83.0621	-1.52653
ENSMUST00000181751.1	Gm26825	0.00396999	0.99603	1.48776	306.259	205.751	0.573138
ENSMUST00000201810.3	Add1	0.00397441	0.996026	0.77352	403.218	521.447	-0.37049
ENSMUST00000052441.11	Slc17a5	0.00397961	0.99602	0.797561	666.577	835.916	-0.326333
ENSMUST00000149234.7	Aifm3	0.00400175	0.995998	0.663699	814.639	1227.59	-0.591399
ENSMUST00000163080.2	1110002E22Rik	0.00400976	0.99599	1.56181	181.282	115.96	0.643216
ENSMUST00000154609.2	Hmg20b	0.00401878	0.995981	0.349085	22.9791	66.9074	-1.51835
ENSMUST00000004646.12	Coro1c	0.00403603	0.995964	1.5209	4352.84	2861.82	0.604927
ENSMUST00000211649.1	Slc8a2	0.0040495	0.995951	1.19031	7128.2	5988.42	0.251342
ENSMUST00000102729.9	Eps15	0.004067	0.995933	0.842563	5153.4	6116.44	-0.247143
ENSMUST00000167032.1	Inpp5d	0.00408522	0.995915	0.553071	82.125	148.957	-0.854463
ENSMUST00000129001.7	Ankrd13a	0.00410086	0.995899	0.328532	22.8847	70.8423	-1.60589
ENSMUST00000109857.7	Eml1	0.00410098	0.995899	0.569108	217.923	383.359	-0.813226
ENSMUST00000128410.7	Cmtr1	0.00416644	0.995834	6.50918	46.4787	6.64986	2.70248
ENSMUST00000004560.11	Bid	0.00422691	0.995773	0.529529	105.743	200.207	-0.917219
ENSMUST00000190211.1	Glrx2	0.00424828	0.995752	0.789748	344.199	435.988	-0.340536
ENSMUST00000123929.8	Pigq	0.00426053	0.995739	2.18714	117.45	53.3858	1.12904
ENSMUST00000140105.7	F730043M19Rik	0.00427027	0.99573	0.565631	37.5983	66.7285	-0.822067
ENSMUST00000182341.7	Ano4	0.00428812	0.995712	1.41598	538.288	379.983	0.501796
ENSMUST00000226770.1	Pck2	0.00432709	0.995673	0.700606	246.033	351.42	-0.513324
ENSMUST00000141886.1	Zdhhc7	0.00433974	0.99566	5.88812	12.036	1.76615	2.55781
ENSMUST00000106113.1	Foxk2	0.00434756	0.995652	1.15075	3975.27	3454.46	0.202575
ENSMUST00000027741.11	Xpr1	0.00437794	0.995622	1.54234	6556.87	4251.14	0.625119
ENSMUST00000101376.2	Plb1	0.00438694	0.995613	2.61532	77.3859	29.2314	1.38699
ENSMUST00000142295.7	Prdm15	0.00442833	0.995572	1.86194	271.534	145.566	0.896805
ENSMUST00000023400.2	Tmem114	0.00452566	0.995474	0.642047	81.6357	127.323	-0.639249
ENSMUST00000162525.7	Kif1bp	0.00453144	0.995469	5.8988	43.7258	6.93125	2.56042
ENSMUST00000169282.7	Aph1c	0.00454553	0.995454	0.779008	284.848	365.749	-0.360289
ENSMUST00000196469.4	Nfkb1	0.00456826	0.995432	1.42568	227.574	159.452	0.511648
ENSMUST00000109183.2	Cnot6	0.0045941	0.995406	1.84119	65.1099	35.0981	0.880638
ENSMUST00000132968.1	Kif5c	0.00460635	0.995394	2.15084	42.3446	19.3773	1.1049
ENSMUST00000176030.7	Smarca2	0.0046374	0.995363	0.706439	1500.93	2124.88	-0.501364
ENSMUST00000102642.8	Ube2l6	0.00469931	0.995301	0.634865	78.9261	124.653	-0.655478
ENSMUST00000071985.5	Slco4c1	0.00469976	0.9953	0.578117	80.5903	139.629	-0.790567
ENSMUST00000206023.1	Syt5	0.00470097	0.995299	1.44156	602.756	418.025	0.527632
ENSMUST00000051118.6	Tvp23a	0.00473966	0.99526	1.43313	1763.08	1230.13	0.51917
ENSMUST00000031122.8	Gabrb1	0.00474382	0.995256	1.16966	9378.83	8018.4	0.226086
ENSMUST00000135200.1	Neb	0.00476028	0.99524	2.12098	52.5066	24.4494	1.08473
ENSMUST00000127451.1	Wdr61	0.00477008	0.99523	0.189679	16.5339	89.6442	-2.39837
ENSMUST00000017288.8	Rnd3	0.00477232	0.995228	1.34845	475.255	352.36	0.431297
ENSMUST00000142957.5	Pisd	0.00480595	0.995194	1.794	567.692	316.184	0.843176
ENSMUST00000024260.13	Pcbp4	0.00481528	0.995185	0.859231	2770.06	3223.98	-0.218882
ENSMUST00000115458.8	Pde4a	0.00483645	0.995164	5.20218	43.6682	7.92596	2.37912
ENSMUST00000059768.16	Tead1	0.00483735	0.995163	3.31818	191.329	57.2558	1.73039
ENSMUST00000025462.6	Rbfa	0.00484108	0.995159	0.84747	693.026	817.815	-0.238766
ENSMUST00000037541.8	Dgat2l6	0.00484488	0.995155	4.65618	32.6524	6.55754	2.21915
ENSMUST00000128260.8	Ramp2	0.00487126	0.995129	0.397347	39.968	101.466	-1.33153
ENSMUST00000216219.1	Rasgrf2	0.00487658	0.995123	0.264066	30.1814	115.911	-1.92103
ENSMUST00000112380.8	Phka2	0.00493365	0.995066	1.36861	537.642	392.683	0.452706
ENSMUST00000064139.7	Plpp3	0.00494724	0.995053	0.881419	8751.85	9929.31	-0.182099
ENSMUST00000045788.8	H2afy	0.00495384	0.995046	0.676451	383.357	566.995	-0.563942
ENSMUST00000023151.5	Bcl6	0.00499874	0.995001	0.683649	1635.76	2392.84	-0.548672
ENSMUST00000164877.7	Rims1	0.00502042	0.99498	0.817449	1090.89	1334.64	-0.290799
ENSMUST00000149123.2	Tmem168	0.00508527	0.994915	0.485207	46.1417	95.712	-1.04333
ENSMUST00000127005.1	Fcho1	0.00510444	0.994896	0.684211	117.003	171.271	-0.547487
ENSMUST00000212334.1	C230057M02Rik	0.00512144	0.994879	0.688472	219.99	319.686	-0.53853
ENSMUST00000129295.1	Eif4a1	0.00517239	0.994828	0.664953	101.236	152.414	-0.588676
ENSMUST00000046765.9	Kcnk1	0.00519317	0.994807	1.51405	3951.82	2609.98	0.598416
ENSMUST00000177150.1	AA465934	0.00522359	0.994776	30.8081	59.6093	1.374	4.94524
ENSMUST00000199645.1	Snhg8	0.00529469	0.994705	0.230463	3.3299	16.3843	-2.11739
ENSMUST00000015841.11	Setdb1	0.00530268	0.994697	0.22096	36.9428	169.236	-2.17815
ENSMUST00000159584.2	Nwd2	0.00534575	0.994654	0.783403	1154.58	1473.9	-0.352174
ENSMUST00000162067.1	Lct	0.00536314	0.994637	0.231781	2.90826	13.6572	-2.10917
ENSMUST00000188211.7	Larp4b	0.00540764	0.994592	1.16636	1302.69	1116.8	0.222016
ENSMUST00000199369.4	Aldh2	0.00542014	0.99458	0.737278	299.335	406.207	-0.43972
ENSMUST00000135343.1	Gprin1	0.00546827	0.994532	1.69117	2457.83	1453.1	0.758018
ENSMUST00000160737.7	Hapln2	0.00546902	0.994531	0.650507	304.465	468.223	-0.620363
ENSMUST00000106495.7	Grb2	0.00548981	0.99451	1.2498	845.823	676.653	0.321692
ENSMUST00000155671.7	Vps29	0.00550269	0.994497	0.849443	1512.07	1780.13	-0.235411
ENSMUST00000000809.2	Slc5a5	0.00552136	0.994479	1.90503	1144.29	600.521	0.929815
ENSMUST00000049488.8	Serinc5	0.0055281	0.994472	0.847588	2386.99	2816.27	-0.238565
ENSMUST00000115264.1	Dock11	0.00557557	0.994424	0.595742	84.1777	141.692	-0.74724
ENSMUST00000106701.1	Scp2	0.00562252	0.994377	0.84317	988.181	1172.09	-0.246105
ENSMUST00000182315.7	Cul9	0.00562499	0.994375	0.566101	128.58	227.577	-0.820868
ENSMUST00000173274.1	Gne	0.00563954	0.99436	0.180075	8.24828	48.4441	-2.47333
ENSMUST00000033020.13	Acer3	0.00565814	0.994342	0.806556	700.746	868.893	-0.310153
ENSMUST00000028293.11	Sdccag3	0.00577073	0.994229	1.60148	452.822	282.534	0.679404
ENSMUST00000041968.10	Tmem135	0.00579781	0.994202	1.10922	2269.71	2046.18	0.149548
ENSMUST00000207498.1	U2af2	0.00582481	0.994175	0.520505	49.1389	94.9401	-0.942016
ENSMUST00000198878.1	Wls	0.00583168	0.994168	1.53916	101.642	65.834	0.622144
ENSMUST00000033673.6	Nono	0.00584221	0.994158	1.10791	5327.74	4808.81	0.147835
ENSMUST00000030412.10	Ppt1	0.00585749	0.994143	0.887508	2969.49	3345.95	-0.172168
ENSMUST00000038409.11	Podxl2	0.0059105	0.994089	1.84414	4832.93	2620.43	0.882951
ENSMUST00000170979.1	Kdm1a	0.0059207	0.994079	1.54762	188.974	121.901	0.630052
ENSMUST00000088194.6	Ndufa9	0.00592518	0.994075	1.53071	187.402	122.227	0.614199
ENSMUST00000015829.14	Acadsb	0.00612968	0.99387	0.782363	493.706	631.138	-0.35409
ENSMUST00000182478.7	Zfp532	0.00618576	0.993814	1.61783	120.973	74.5539	0.694056
ENSMUST00000073625.7	Inca1	0.00622659	0.993773	0.312305	6.91552	23.42	-1.67897
ENSMUST00000163751.9	Pde2a	0.00623191	0.993768	1.40559	3791.35	2697.17	0.491178
ENSMUST00000180387.2	Gm2115	0.00623709	0.993763	0.703404	4711.47	6698.23	-0.507574
ENSMUST00000120638.7	Syn3	0.00623959	0.99376	1.55003	359.949	232.103	0.632292
ENSMUST00000109993.8	Tcn2	0.00632621	0.993674	0.756951	188.863	249.691	-0.401729
ENSMUST00000141387.3	Sypl2	0.00633545	0.993665	0.567501	91.5387	161.539	-0.817305
ENSMUST00000225636.1	Synpr	0.00636044	0.99364	5.36263	43.6321	7.66475	2.42294
ENSMUST00000091224.10	Sardh	0.00638464	0.993615	6.11364	165.688	26.6165	2.61203
ENSMUST00000108461.7	Ercc2	0.00642578	0.993574	0.674329	121.802	180.907	-0.568475
ENSMUST00000219024.1	Ppfia2	0.00646709	0.993533	0.635947	1552.55	2441.65	-0.653021
ENSMUST00000063663.5	B3gat2	0.00652994	0.99347	0.79566	683.925	859.65	-0.329776
ENSMUST00000122266.2	Speg	0.00654259	0.993457	3.8503	25.3397	6.15211	1.94497
ENSMUST00000007255.12	Ddah2	0.00656433	0.993436	1.44413	291.847	201.913	0.530205
ENSMUST00000111398.7	Ncor2	0.00664318	0.993357	2.01579	1603.39	795.122	1.01134
ENSMUST00000155040.1	Zmym3	0.00664981	0.99335	0.600179	53.6385	89.7571	-0.736536
ENSMUST00000212973.1	Ist1	0.0066749	0.993325	0.840248	1248.89	1486.44	-0.251114
ENSMUST00000074546.6	Sdk1	0.00668052	0.993319	1.95722	206.535	105.241	0.968803
ENSMUST00000085248.11	Morf4l1	0.00669248	0.993308	0.787897	1219.85	1548.39	-0.343922
ENSMUST00000009713.13	Mkl2	0.00674113	0.993259	0.478794	60.0408	126.031	-1.06252
ENSMUST00000222823.1	Gm40841	0.00685187	0.993148	0.606779	141.865	234.001	-0.720757
ENSMUST00000164710.7	Tgfb1i1	0.00688269	0.993117	1.6054	89.1993	55.4359	0.682929
ENSMUST00000025645.13	Tmem132a	0.00697469	0.993025	1.21304	5447.63	4490.78	0.27863
ENSMUST00000057373.13	Rab11b	0.00699288	0.993007	0.876668	1343.57	1532.63	-0.189898
ENSMUST00000092500.10	Amz2	0.00705446	0.992946	0.850039	1156.52	1360.61	-0.2344
ENSMUST00000227955.1	Pde1b	0.00706894	0.992931	2.48775	156.084	62.3944	1.31484
ENSMUST00000160337.1	Zwint	0.00708614	0.992914	1.7544	73.2548	41.5055	0.810981
ENSMUST00000005173.10	Sgsh	0.00709113	0.992909	0.686979	195.208	284.418	-0.541662
ENSMUST00000040455.4	Hif1an	0.00716962	0.99283	0.878079	1802.05	2052.31	-0.187577
ENSMUST00000165594.3	43715	0.0071981	0.992802	0.915037	9406.87	10280.4	-0.128099
ENSMUST00000045628.14	R3hdm4	0.00720702	0.992793	0.837155	7733.17	9237.56	-0.256433
ENSMUST00000020277.8	Hkdc1	0.00720934	0.992791	1.51497	216.558	142.84	0.599288
ENSMUST00000119993.7	Tspan5	0.0072327	0.992767	1.30382	2019.64	1548.88	0.382748
ENSMUST00000027404.11	Ptprn	0.00723717	0.992763	1.3149	20732.9	15767.6	0.394955
ENSMUST00000109908.7	Nf2	0.00727315	0.992727	2.29203	56.3646	24.2648	1.19662
ENSMUST00000067752.3	Mettl7a1	0.00729227	0.992708	0.773741	855.86	1106.23	-0.370078
ENSMUST00000203955.2	Plekha5	0.00729471	0.992705	0.355872	60.3048	170.506	-1.49057
ENSMUST00000028123.3	Gad2	0.00736374	0.992636	1.16897	5920.04	5064.25	0.225244
ENSMUST00000021101.3	Sap30bp	0.00741034	0.99259	1.38255	330.156	238.643	0.467328
ENSMUST00000192639.5	Prdx6	0.00742774	0.992572	0.799595	2321.92	2904.01	-0.322658
ENSMUST00000186971.1	Tuba4a	0.00745537	0.992545	1.29445	710.525	548.771	0.372334
ENSMUST00000079998.12	Tyw5	0.00748055	0.992519	0.606126	53.5248	88.6831	-0.72231
ENSMUST00000172904.7	Gtf2i	0.0074834	0.992517	0.649589	987.353	1520.28	-0.622401
ENSMUST00000096365.3	Scrt1	0.00749245	0.992508	0.849901	2801.06	3295.85	-0.234634
ENSMUST00000184373.1	Gm27232	0.00750971	0.99249	3.46053	28.1429	7.91093	1.79099
ENSMUST00000217999.1	Ldah	0.00752444	0.992476	1.87907	77.2086	40.8175	0.910021
ENSMUST00000189441.1	9230112E08Rik	0.00755102	0.992449	0.817339	456.609	558.728	-0.290993
ENSMUST00000070681.6	Gid4	0.00756158	0.992438	0.82774	2200.91	2659	-0.27275
ENSMUST00000040361.7	Atp6v0e2	0.00759297	0.992407	0.899408	10890.2	12108.2	-0.152952
ENSMUST00000111194.7	Cd44	0.0076034	0.992397	2.51814	201.736	79.7636	1.33236
ENSMUST00000058902.5	Eml6	0.00761114	0.992389	0.79828	818.844	1025.85	-0.325034
ENSMUST00000160197.5	Exoc6b	0.00761348	0.992387	0.792993	3916.86	4939.43	-0.33462
ENSMUST00000205977.1	Bcl7c	0.00762805	0.992372	4.98608	16.1481	2.77522	2.31791
ENSMUST00000065797.6	Chst1	0.00764058	0.992359	1.46538	14295.8	9755.58	0.551279
ENSMUST00000061052.11	Atat1	0.00767922	0.992321	1.92573	59.1267	30.4249	0.945406
ENSMUST00000125187.1	Gap43	0.00769469	0.992305	1.81099	114.496	62.9631	0.856779
ENSMUST00000225130.1	AC159301.1	0.00774409	0.992256	7.58184	44.972	5.66096	2.92255
ENSMUST00000064883.13	Plekha2	0.00774631	0.992254	1.99006	2857.35	1435.65	0.992808
ENSMUST00000109642.7	Sec61g	0.00777241	0.992228	3.27136	23.1178	6.66426	1.70989
ENSMUST00000051226.6	Pfkm	0.00781831	0.992182	1.08828	13778.8	12661	0.122045
ENSMUST00000189617.2	Lrrfip1	0.00787098	0.992129	2.10585	128.846	60.8806	1.0744
ENSMUST00000156542.7	Slx4	0.00791831	0.992082	0.636481	242.849	381.881	-0.651811
ENSMUST00000031490.10	Ulk1	0.00795964	0.99204	1.11487	3442.37	3087.64	0.156881
ENSMUST00000018561.13	Myo1b	0.00802162	0.991978	0.696747	205.84	295.683	-0.521294
ENSMUST00000056045.4	Fam185a	0.00804113	0.991959	1.18233	639.207	540.581	0.241636
ENSMUST00000114726.7	Rbmx	0.00807379	0.991926	1.49232	577.381	386.711	0.577555
ENSMUST00000107950.8	2410002F23Rik	0.008144	0.991856	2.06087	285.066	138.025	1.04325
ENSMUST00000005643.13	Celf1	0.00839199	0.991608	1.82376	190.434	104.157	0.866916
ENSMUST00000223738.1	AC134898.1	0.00877831	0.991222	2.31992	61.5127	26.3377	1.21407
ENSMUST00000162686.7	Tyw5	0.00877969	0.99122	1.57354	131.935	83.6352	0.654011
ENSMUST00000159774.6	Abhd18	0.00900117	0.990999	0.757839	438.273	578.504	-0.400037
ENSMUST00000205318.1	Man2a2	0.00907119	0.990929	0.780798	2595.26	3324.02	-0.35698
ENSMUST00000129106.1	Pnck	0.00908831	0.990912	0.726848	136.08	187.437	-0.460274
ENSMUST00000211715.1	Pgpep1	0.00914843	0.990852	2.12749	58.2123	27.0547	1.08916
ENSMUST00000046627.5	Osbpl10	0.00919197	0.990808	1.30989	303.106	231.261	0.389446
ENSMUST00000152698.1	Efnb2	0.00926571	0.990734	3.59178	23.8466	6.22092	1.8447
ENSMUST00000142949.7	Ufl1	0.00929679	0.990703	0.745377	198.015	265.772	-0.423958
ENSMUST00000171962.2	Camsap3	0.00934718	0.990653	1.52116	273.656	179.701	0.605169
ENSMUST00000053232.6	Ptp4a3	0.00939252	0.990607	2.45521	612.153	248.985	1.29585
ENSMUST00000138865.7	Slc25a22	0.00941936	0.990581	1.52723	447.029	292.506	0.610919
ENSMUST00000099576.8	Fmn1	0.00943596	0.990564	0.727544	475.803	654.111	-0.458894
ENSMUST00000044297.6	Igfbpl1	0.00949056	0.990509	2.69607	172.947	63.9514	1.43086
ENSMUST00000045153.10	Pik3ip1	0.00957689	0.990423	0.726721	789.565	1086.6	-0.460527
ENSMUST00000200839.3	Scn1a	0.00967561	0.990324	0.782863	303.974	388.446	-0.353168
ENSMUST00000030698.4	Stx12	0.00974006	0.99026	1.10462	5140.35	4653.48	0.143548
ENSMUST00000044048.7	Hspb6	0.00977559	0.990224	2.12911	107.155	50.0213	1.09025
ENSMUST00000194895.5	Slc38a3	0.00982432	0.990176	1.44038	323.909	224.701	0.526445
ENSMUST00000049285.9	Lrrn1	0.00983729	0.990163	0.830664	3251.44	3914.33	-0.267663
ENSMUST00000037708.9	Asic4	0.00994054	0.990059	0.709	167.541	236.545	-0.496143
ENSMUST00000114812.7	Golgb1	0.0100184	0.989982	1.82545	585.577	320.523	0.868252
ENSMUST00000177329.1	Scnn1a	0.0100383	0.989962	0.334823	27.5428	83.4124	-1.57853
ENSMUST00000107158.8	Slc24a2	0.0100505	0.989949	0.709412	7585.59	10693	-0.495303
ENSMUST00000112426.7	Pus1	0.0100653	0.989935	0.566914	59.3084	105.059	-0.818799
ENSMUST00000177373.7	Stx5a	0.0100743	0.989926	9.3713	61.2849	6.02183	3.22825
ENSMUST00000068167.12	Lrrfip1	0.0101077	0.989892	2.16067	133.698	61.5667	1.11148
ENSMUST00000106778.1	Ddx5	0.0101798	0.98982	0.617762	64.7857	105.23	-0.694877
ENSMUST00000161614.1	Gm4524	0.0102044	0.989796	0.55341	38.4487	69.7276	-0.85358
ENSMUST00000174648.5	Ndst4	0.0104145	0.989585	0.470868	108.108	230.245	-1.0866
ENSMUST00000153638.7	Dcaf11	0.0105023	0.989498	0.682502	142.073	208.435	-0.551095
ENSMUST00000027477.14	Ngef	0.0106198	0.98938	0.847968	2569.17	3029.9	-0.237918
ENSMUST00000028944.3	Acss1	0.0106218	0.989378	0.75773	949.37	1253.02	-0.400244
ENSMUST00000103220.3	Snrnp200	0.0106254	0.989375	0.940878	4975.9	5288.6	-0.0879201
ENSMUST00000102880.4	Ppp3r1	0.0106656	0.989334	0.774138	22845.9	29511.5	-0.369337
ENSMUST00000109805.7	Nudcd3	0.0106958	0.989304	0.851351	1957.76	2299.69	-0.232174
ENSMUST00000046750.13	Tspan33	0.0107429	0.989257	0.756642	451.762	597.248	-0.402316
ENSMUST00000018744.14	Shmt1	0.0108241	0.989176	0.54534	90.3285	165.916	-0.874771
ENSMUST00000036691.13	Prrc2b	0.0109516	0.989048	1.14889	3890.36	3386.13	0.200236
ENSMUST00000034270.16	Map1lc3b	0.0109893	0.989011	0.883773	5323.08	6023.17	-0.178252
ENSMUST00000164963.7	Kctd18	0.0110481	0.988952	0.413239	24.4455	59.9788	-1.27495
ENSMUST00000116468.1	Mphosph8	0.0111122	0.988888	1.13062	1928.46	1705.63	0.17711
ENSMUST00000093800.8	Pls1	0.0113301	0.98867	0.732258	304.335	415.726	-0.449577
ENSMUST00000218361.1	Mcm3ap	0.0114244	0.988576	0.319827	9.02477	29.4504	-1.64463
ENSMUST00000005651.12	Por	0.011426	0.988574	1.15732	2895.68	2501.97	0.21079
ENSMUST00000109246.1	Prex1	0.011477	0.988523	1.87593	477.055	254.033	0.907604
ENSMUST00000110115.8	Asap1	0.0115165	0.988483	1.91139	263.374	137.515	0.934623
ENSMUST00000034775.9	Fem1b	0.0115343	0.988466	1.17471	6119.24	5209.12	0.232299
ENSMUST00000084124.6	Pgd	0.0115875	0.988413	1.14425	1186.8	1037.14	0.194408
ENSMUST00000000642.10	Hk2	0.0115996	0.9884	1.44858	292.994	202.159	0.534638
ENSMUST00000041627.13	Sdk2	0.0117758	0.988224	1.24607	1022.53	820.538	0.31738
ENSMUST00000020957.12	Adi1	0.0118538	0.988146	0.805076	702.2	872.297	-0.312802
ENSMUST00000194016.5	Pex5l	0.0118609	0.988139	0.583035	143.036	245.745	-0.778345
ENSMUST00000107409.4	Mfge8	0.0121982	0.987802	0.753891	3144.76	4171.57	-0.407572
ENSMUST00000046288.14	Ndufv3	0.0122453	0.987755	0.800898	405.931	506.928	-0.32031
ENSMUST00000031059.13	Ppargc1a	0.0124596	0.98754	1.40601	188.997	134.254	0.491607
ENSMUST00000225609.1	Camk2g	0.0127179	0.987282	0.610482	133.25	218.64	-0.711978
ENSMUST00000021458.12	Sptb	0.0127682	0.987232	0.831391	8696.65	10460.4	-0.266401
ENSMUST00000098036.8	Cln3	0.0127861	0.987214	0.585029	85.5737	146.684	-0.77342
ENSMUST00000219372.1	Epb41l2	0.0129681	0.987032	6.53259	9.81048	1.01084	2.70766
ENSMUST00000020573.12	Prss57	0.013117	0.986883	3.21416	62.7721	19.1305	1.68444
ENSMUST00000051504.7	Ecm2	0.0131561	0.986844	0.487477	109.892	226.039	-1.03659
ENSMUST00000076968.10	Syt7	0.0132156	0.986784	0.902864	11612.9	12862.3	-0.14742
ENSMUST00000021930.9	Sfxn1	0.0132828	0.986717	1.16649	1950.22	1671.84	0.222168
ENSMUST00000032477.5	Necap1	0.0133371	0.986663	1.0932	7145.92	6536.7	0.128551
ENSMUST00000141754.1	Ptp4a2	0.0135085	0.986492	2.44028	140.566	57.2603	1.28705
ENSMUST00000043050.8	Chst12	0.013545	0.986455	0.762768	483.992	634.618	-0.390684
ENSMUST00000227278.1	Dopey2	0.0135606	0.986439	0.837725	559.415	667.89	-0.255451
ENSMUST00000052837.8	Ar	0.0137933	0.986207	0.746047	796.052	1067.13	-0.422662
ENSMUST00000201202.3	Babam2	0.0138948	0.986105	4.35112	52.3095	11.5756	2.12139
ENSMUST00000118442.7	Adgrl3	0.0140729	0.985927	2.81702	250.629	88.5957	1.49417
ENSMUST00000115869.2	Mpp7	0.0140757	0.985924	1.5074	175.525	116.337	0.592061
ENSMUST00000210637.1	Abcc8	0.0140808	0.985919	0.638633	242.49	379.892	-0.646942
ENSMUST00000177595.8	Fut8	0.0141249	0.985875	0.458698	29.6308	65.2818	-1.12438
ENSMUST00000133625.7	Sirt7	0.0141262	0.985874	1.23735	454.372	367.103	0.307252
ENSMUST00000082373.7	Luzp2	0.0142279	0.985772	0.737075	3363.27	4563.11	-0.440116
ENSMUST00000023133.7	Ppp1r1a	0.0142293	0.985771	1.37142	2329.86	1698.78	0.455673
ENSMUST00000026011.6	Sfxn2	0.0142481	0.985752	0.772937	201.631	260.955	-0.371578
ENSMUST00000205658.1	B9d2	0.0142786	0.985721	1.24653	443.073	355.329	0.317921
ENSMUST00000069742.6	Prr18	0.0143197	0.98568	0.595959	293.682	493.182	-0.746714
ENSMUST00000182328.7	Psmd8	0.0144305	0.98557	1.14436	3347.66	2925.27	0.194547
ENSMUST00000025631.6	Ostf1	0.0144507	0.985549	1.20576	583.588	483.945	0.269937
ENSMUST00000053718.14	Rlbp1	0.0145097	0.98549	0.44984	147.093	327.698	-1.15251
ENSMUST00000003687.7	Tgfb3	0.0145539	0.985446	1.24353	483.269	388.566	0.314439
ENSMUST00000219939.1	Nrcam	0.0145664	0.985434	0.46666	30.9979	67.0876	-1.09956
ENSMUST00000216436.1	Keap1	0.0146343	0.985366	1.57261	122.05	77.399	0.653159
ENSMUST00000087675.8	Dera	0.0146541	0.985346	1.93684	80.7935	41.4337	0.953704
ENSMUST00000130911.7	Nfyb	0.0146655	0.985335	1.17312	1620.98	1381.72	0.230348
ENSMUST00000005431.5	Letm1	0.014782	0.985218	1.0848	3116.87	2873.19	0.117434
ENSMUST00000070117.7	Cnot10	0.0150228	0.984977	1.16411	1020.62	876.655	0.219233
ENSMUST00000028648.2	Syt13	0.015065	0.984935	1.33955	10972.2	8190.85	0.421749
ENSMUST00000199310.1	Pcdh7	0.0150838	0.984916	40.6609	22.9903	0	5.34557
ENSMUST00000223762.1	3830406C13Rik	0.0151459	0.984854	1.35757	369.333	271.902	0.441027
ENSMUST00000147853.7	Txndc16	0.0152342	0.984766	0.490279	25.9445	53.2661	-1.02833
ENSMUST00000193869.1	Pcdhga2	0.0152953	0.984705	0.772808	455.344	589.305	-0.371817
ENSMUST00000055262.12	Vti1b	0.0153347	0.984665	1.14906	2304.34	2005.36	0.20046
ENSMUST00000136506.1	Smap1	0.0154281	0.984572	2.68029	82.0182	30.237	1.42239
ENSMUST00000113132.8	Pbx3	0.0154903	0.98451	1.67833	212.393	126.316	0.747026
ENSMUST00000160452.1	Ric1	0.0159617	0.984038	1.35922	335.661	246.799	0.442775
ENSMUST00000091471.11	Thrb	0.0161126	0.983887	1.93018	57.5079	29.5147	0.948736
ENSMUST00000022268.9	Pdhb	0.0162947	0.983705	1.12455	4191.36	3727.09	0.169346
ENSMUST00000046633.9	AW549877	0.0163083	0.983692	0.88511	2330.19	2632.69	-0.176071
ENSMUST00000133090.1	Srsf11	0.0164968	0.983503	0.83259	969.135	1164.06	-0.264323
ENSMUST00000109728.7	Snta1	0.0165113	0.983489	1.32156	1370.08	1036.58	0.402239
ENSMUST00000019229.14	Med8	0.0168923	0.983108	1.25607	428.096	340.705	0.328911
ENSMUST00000132274.7	Rsad1	0.0170094	0.982991	3.53705	78.4103	21.7525	1.82255
ENSMUST00000049658.13	Pitpnm1	0.0170443	0.982956	0.866776	3120.67	3600.41	-0.206269
ENSMUST00000107285.7	Ezh1	0.0171467	0.982853	0.72286	1769.06	2447.54	-0.468212
ENSMUST00000111210.8	Mndal	0.0171716	0.982828	0.616957	54.1683	88.159	-0.696758
ENSMUST00000102553.10	Hmgn2	0.0172091	0.982791	1.22896	2334.1	1899.15	0.297433
ENSMUST00000144986.1	Cda	0.0172107	0.982789	9.81276	23.508	2.09494	3.29466
ENSMUST00000040689.14	Atg9a	0.0172724	0.982728	0.85968	2151.05	2502.24	-0.218129
ENSMUST00000102911.9	Slc44a1	0.0174017	0.982598	0.773661	1023.08	1322.56	-0.370227
ENSMUST00000121927.7	Nrip1	0.0174093	0.982591	0.800481	1343.53	1678.48	-0.32106
ENSMUST00000000828.12	Txnrd3	0.0174104	0.98259	1.35746	195.185	143.634	0.440908
ENSMUST00000156550.7	Syvn1	0.0174589	0.982541	6.20248	249.97	39.8154	2.63284
ENSMUST00000135175.7	43712	0.0174797	0.98252	0.344813	12.9677	38.7095	-1.53611
ENSMUST00000104937.1	Ankrd63	0.0174892	0.982511	0.636889	389.115	611.14	-0.650886
ENSMUST00000155284.7	Reps1	0.017587	0.982413	0.149998	19.9889	136.546	-2.73698
ENSMUST00000156795.1	Aifm1	0.0178145	0.982186	1.88446	66.2747	34.897	0.91415
ENSMUST00000026408.6	Gdf11	0.017879	0.982121	0.817226	722.256	883.86	-0.291193
ENSMUST00000136011.1	BC030499	0.0181718	0.981828	0.361606	25.5094	71.136	-1.46751
ENSMUST00000194489.5	Cep170	0.0184299	0.98157	0.711911	143.629	201.986	-0.490232
ENSMUST00000022871.6	Sdc2	0.0185359	0.981464	1.21185	1351.42	1115.11	0.277215
ENSMUST00000022715.13	Rbm26	0.0185916	0.981408	1.27114	582.878	458.422	0.346128
ENSMUST00000126445.6	Fam160a1	0.0186383	0.981362	0.421415	122.092	290.516	-1.24669
ENSMUST00000041606.13	Necab1	0.0191609	0.980839	1.61788	4484.26	2771.57	0.6941
ENSMUST00000101610.9	Rhbdd3	0.019172	0.980828	1.46754	139.774	95.0589	0.553399
ENSMUST00000112480.2	Slc4a10	0.019199	0.980801	1.56728	2091.21	1334.08	0.648262
ENSMUST00000212503.1	Abhd8	0.0192206	0.980779	0.726107	132.754	182.956	-0.461746
ENSMUST00000033170.6	Mrpl17	0.0192616	0.980738	4.92767	25.2364	4.65934	2.30091
ENSMUST00000105646.2	Ajap1	0.019298	0.980702	1.21767	1629.72	1338.34	0.284124
ENSMUST00000224553.1	Celf4	0.0194586	0.980541	1.21267	612.211	504.742	0.278192
ENSMUST00000001619.14	Ergic1	0.0195223	0.980478	3.19035	114.546	35.5058	1.67372
ENSMUST00000068056.11	Ddx39b	0.0195513	0.980449	1.10652	4012.58	3626.25	0.14603
ENSMUST00000139146.7	Arhgap6	0.0196726	0.980327	2.33476	198.357	84.6265	1.22328
ENSMUST00000018246.5	Hist1h2bc	0.0196733	0.980327	1.33231	1289.01	967.413	0.413931
ENSMUST00000076183.11	Rnf207	0.0197221	0.980278	0.507918	57.1263	113.033	-0.977332
ENSMUST00000081619.8	Sh3pxd2a	0.0198577	0.980142	0.57195	251.018	439.315	-0.806039
ENSMUST00000023312.13	Alcam	0.0199406	0.980059	0.798599	2942.51	3684.68	-0.324457
ENSMUST00000202453.3	Plb1	0.0199591	0.980041	2.53508	61.3196	23.9997	1.34203
ENSMUST00000114913.1	Adcy5	0.0205073	0.979493	1.15882	5005.94	4319.83	0.212653
ENSMUST00000147943.1	Tub	0.0206208	0.979379	0.685155	189.239	276.342	-0.545498
ENSMUST00000197743.1	Plppr4	0.0206414	0.979359	2.76953	245.463	88.2596	1.46964
ENSMUST00000047208.11	Dzip1	0.0206932	0.979307	0.832245	464.33	558.042	-0.264919
ENSMUST00000164848.2	Siah3	0.0208498	0.97915	0.826028	428.839	519.224	-0.275737
ENSMUST00000070085.5	AI504432	0.0208506	0.979149	1.22969	1114.22	906.041	0.298295
ENSMUST00000113897.8	Apoo	0.0209255	0.979075	5.94951	24.1864	3.58304	2.57277
ENSMUST00000207230.1	Tacc2	0.0213186	0.978681	0.760351	387.682	509.97	-0.395262
ENSMUST00000128757.7	Mpv17l	0.0214644	0.978536	0.644609	502.223	779.433	-0.633503
ENSMUST00000024829.6	Abcg1	0.0216139	0.978386	0.853161	1774.41	2079.86	-0.22911
ENSMUST00000064167.7	Rnf11	0.0216461	0.978354	1.07678	4659.69	4327.37	0.106729
ENSMUST00000136529.1	Prdm15	0.0216884	0.978312	3.58501	14.845	3.72286	1.84198
ENSMUST00000204325.1	Clasp1	0.0216901	0.97831	1.11628	1573.94	1409.93	0.158701
ENSMUST00000159364.2	Fcor	0.0217284	0.978272	1.48935	141.624	94.9888	0.574686
ENSMUST00000139831.7	Rap1gap	0.0217689	0.978231	1.22822	464.275	377.899	0.296568
ENSMUST00000170134.7	Rangap1	0.0221198	0.97788	1.59142	629.087	395.083	0.670317
ENSMUST00000075290.6	St8sia5	0.0224202	0.97758	1.18753	715.749	602.626	0.24797
ENSMUST00000228639.1	Sybu	0.0224964	0.977504	0.658583	111.385	169.29	-0.602564
ENSMUST00000220607.1	Cinp	0.0226386	0.977361	1.48077	454.991	307.079	0.566343
ENSMUST00000092891.5	Cacng7	0.0228371	0.977163	0.932708	4630.89	4965.01	-0.100503
ENSMUST00000027846.7	Tada1	0.0230831	0.976917	1.19808	1270.22	1060.16	0.260721
ENSMUST00000057257.9	Jkamp	0.0232215	0.976778	1.45765	296.682	203.353	0.543641
ENSMUST00000023561.7	Senp2	0.0234456	0.976554	0.905025	2957.28	3267.66	-0.143971
ENSMUST00000135692.1	Homer3	0.0235354	0.976465	2.61444	38.9669	14.5466	1.3865
ENSMUST00000164748.7	Rara	0.023723	0.976277	3.355	206.463	61.1319	1.74631
ENSMUST00000029078.8	Car2	0.0238541	0.976146	0.747356	4504.17	6026.91	-0.420132
ENSMUST00000142890.7	Tspan5	0.0239227	0.976077	1.23266	4608.61	3738.66	0.301771
ENSMUST00000112362.2	Cdk18	0.0239616	0.976038	3.98487	641.145	160.461	1.99453
ENSMUST00000134885.2	Rapgef3	0.0239902	0.97601	0.231142	9.03513	41.0172	-2.11315
ENSMUST00000102758.7	Vdac1	0.0240987	0.975901	1.19651	15887	13277.7	0.258838
ENSMUST00000101087.9	Srp72	0.0241023	0.975898	1.14033	3703.38	3247.56	0.189456
ENSMUST00000197268.4	Nrxn1	0.024215	0.975785	0.707313	1176.34	1663.34	-0.49958
ENSMUST00000192245.1	Klhdc8b	0.0242858	0.975714	1.88471	67.0384	35.2974	0.914346
ENSMUST00000133306.7	Sgce	0.024353	0.975647	0.495524	35.2537	71.7343	-1.01297
ENSMUST00000105404.8	Adarb1	0.0246405	0.975359	0.823883	2867.05	3480.05	-0.279488
ENSMUST00000218114.1	C630031E19Rik	0.0246608	0.975339	0.508263	34.9466	69.0585	-0.976352
ENSMUST00000027876.10	Scyl3	0.0246699	0.97533	0.784021	467.899	596.954	-0.351035
ENSMUST00000209255.1	Stim1	0.0247154	0.975285	0.579764	150.835	260.586	-0.786461
ENSMUST00000225129.1	Slc30a5	0.0250077	0.974992	3.53597	32.2752	8.88755	1.8221
ENSMUST00000131738.7	Stk16	0.0250244	0.974976	0.432063	13.5542	32.1329	-1.21069
ENSMUST00000107538.1	Cdk12	0.0250742	0.974926	1.30563	371.78	284.615	0.38475
ENSMUST00000199025.4	Anapc5	0.0250892	0.974911	0.717649	370.626	516.673	-0.47865
ENSMUST00000057849.5	C1ql1	0.0252292	0.974771	1.2819	315.051	245.699	0.358288
ENSMUST00000150414.7	Cnp	0.025399	0.974601	0.648909	1985.31	3059.77	-0.623912
ENSMUST00000025520.8	Slc6a7	0.0254598	0.97454	1.51115	4565.26	3020.94	0.59565
ENSMUST00000188475.6	Ramp1	0.0256433	0.974357	5.37912	12.232	1.80207	2.42737
ENSMUST00000115685.7	Aifm3	0.0257146	0.974285	0.646567	214.082	331.423	-0.629128
ENSMUST00000063838.10	Fam49b	0.0263087	0.973691	0.871791	2473.13	2836.89	-0.197946
ENSMUST00000023759.4	Smarcd1	0.0263365	0.973664	1.14116	4394.07	3850.48	0.190505
ENSMUST00000146526.7	Gins2	0.0263828	0.973617	1.22294	920.341	752.457	0.290356
ENSMUST00000040167.10	Mat2b	0.0264698	0.97353	0.781643	1307.02	1672.31	-0.355418
ENSMUST00000153847.1	Hspa8	0.0265558	0.973444	3.79207	1099.73	289.582	1.92298
ENSMUST00000140287.7	Gmppa	0.0265817	0.973418	1.86593	50.2287	26.6499	0.899893
ENSMUST00000112151.1	Rhno1	0.0267023	0.973298	1.97728	220.894	111.43	0.983518
ENSMUST00000040097.13	Palmd	0.0267936	0.973206	0.73052	594.333	813.79	-0.453005
ENSMUST00000137721.1	Crocc	0.027045	0.972955	0.572946	44.9808	78.9399	-0.803528
ENSMUST00000109936.2	Clmn	0.0270794	0.972921	0.827349	4821.07	5827.19	-0.273432
ENSMUST00000031607.6	Dtx1	0.0271048	0.972895	1.33916	2676.23	1998.35	0.421331
ENSMUST00000047666.4	Pgm5	0.0271303	0.97287	0.558145	94.9415	170.367	-0.841289
ENSMUST00000069503.12	Tubd1	0.0273013	0.972699	1.62494	156.13	95.8606	0.700383
ENSMUST00000227483.1	Enpp2	0.0276721	0.972328	0.718646	154.762	215.483	-0.476648
ENSMUST00000019118.7	Sart3	0.0276869	0.972313	1.12366	1683.53	1498.19	0.168205
ENSMUST00000080215.5	Chst15	0.0277628	0.972237	1.52707	2450.07	1604.22	0.610769
ENSMUST00000192463.1	Gria2	0.0279745	0.972026	0.655283	390.037	595.524	-0.60981
ENSMUST00000023694.9	1110004E09Rik	0.0280906	0.971909	1.2618	736.625	583.67	0.33548
ENSMUST00000112210.10	Prkcd	0.0282865	0.971713	0.531765	306.294	576.506	-0.911139
ENSMUST00000050148.4	Cdc37l1	0.0284185	0.971581	0.897519	1602.2	1785.18	-0.155985
ENSMUST00000032732.14	Apba2	0.0284912	0.971509	1.08145	4988.37	4612.63	0.112965
ENSMUST00000114776.2	Pias2	0.0285942	0.971406	1.65316	216.722	130.867	0.725226
ENSMUST00000198615.1	Ints1	0.0288012	0.971199	0.737808	168.014	227.839	-0.438682
ENSMUST00000161658.1	Cacna1h	0.029285	0.970715	0.212207	2.78676	15.2842	-2.23646
ENSMUST00000141192.7	Ttc3	0.0293645	0.970635	2.27527	143.055	62.5489	1.18604
ENSMUST00000029451.11	Tspan2	0.0293973	0.970603	0.812478	2890.86	3558.15	-0.299598
ENSMUST00000107389.7	Acly	0.0296727	0.970327	1.53964	5151.13	3345.48	0.62259
ENSMUST00000114606.7	Etl4	0.0296778	0.970322	1.27806	630.812	493.446	0.35395
ENSMUST00000168527.7	Dennd1b	0.0296938	0.970306	3.26199	200.784	61.1505	1.70575
ENSMUST00000131377.7	Rbm12	0.0298184	0.970182	1.84446	142.271	76.8692	0.883196
ENSMUST00000147703.2	Pdcl	0.0298957	0.970104	3.13439	33.3796	10.2548	1.64818
ENSMUST00000171702.7	Racgap1	0.0299537	0.970046	3.42778	78.9928	22.6343	1.77727
ENSMUST00000138092.7	Tspan4	0.0300633	0.969937	0.376666	14.0122	38.16	-1.40864
ENSMUST00000141722.7	Stxbp5	0.0301144	0.969886	1.44153	1371.83	951.473	0.527598
ENSMUST00000040992.7	Nek9	0.0302182	0.969782	0.905613	2227.62	2459.83	-0.143034
ENSMUST00000105347.1	Mbd3	0.0305103	0.96949	0.777759	388.494	499.67	-0.362605
ENSMUST00000019576.14	Ddx39	0.0305126	0.969487	1.67568	174.768	104.063	0.744746
ENSMUST00000135525.1	Prkag2	0.0305295	0.969471	1.52536	317.797	208.142	0.609154
ENSMUST00000183700.1	Fyco1	0.0306193	0.969381	0.628084	47.7655	76.2478	-0.67097
ENSMUST00000107474.7	Rara	0.030621	0.969379	1.31988	272.056	205.981	0.400406
ENSMUST00000183410.7	Zfp280d	0.0307019	0.969298	0.499058	156.804	314.782	-1.00272
ENSMUST00000038406.6	Akr1b8	0.0307466	0.969253	1.90603	39.65	20.6432	0.930573
ENSMUST00000172134.1	Lamb1	0.0307868	0.969213	4.21551	11.6093	2.49855	2.07571
ENSMUST00000129974.2	Lrp1b	0.0309361	0.969064	0.20479	12.6838	64.1866	-2.28778
ENSMUST00000023431.7	Tbc1d23	0.031013	0.968987	0.823277	640.141	777.677	-0.28055
ENSMUST00000040147.7	Bend3	0.0310575	0.968942	1.88339	193.803	102.629	0.913331
ENSMUST00000175692.7	Rwdd4a	0.0311442	0.968856	3.53559	37.8044	10.2768	1.82195
ENSMUST00000151136.1	Gm10501	0.0311744	0.968826	0.664742	104.037	156.665	-0.589133
ENSMUST00000098230.10	Rhog	0.0313719	0.968628	0.844749	550.577	651.871	-0.243406
ENSMUST00000110127.7	Slc25a42	0.0314631	0.968537	1.99401	898.97	450.547	0.995671
ENSMUST00000132618.1	Eif1	0.0316147	0.968385	1.46463	236.951	161.598	0.550539
ENSMUST00000191774.5	Ythdf3	0.0316241	0.968376	1.54041	235.736	152.832	0.623312
ENSMUST00000100640.4	Sqle	0.0316511	0.968349	2.94951	34.2532	11.23	1.56048
ENSMUST00000164680.7	Gpaa1	0.0318325	0.968168	0.607359	49.0771	81.1789	-0.719379
ENSMUST00000032992.6	Eif3c	0.0319763	0.968024	1.14893	7726.94	6725.32	0.200285
ENSMUST00000222441.1	Eif5	0.03205	0.96795	0.0952534	4.48583	52.5996	-3.39208
ENSMUST00000224544.1	Gjb6	0.0322186	0.967781	0.701774	280.89	400.503	-0.510922
ENSMUST00000090686.10	Sgce	0.0324638	0.967536	0.485993	89.9136	185.623	-1.04099
ENSMUST00000152841.1	43535	0.0324736	0.967526	2.19484	50.6029	22.7398	1.13412
ENSMUST00000095087.10	Rapgef1	0.0325188	0.967481	1.09018	2254.61	2068.06	0.124561
ENSMUST00000103166.8	Cacna1g	0.0326367	0.967363	2.80664	3308.39	1178.4	1.48884
ENSMUST00000164744.7	Uba3	0.0326751	0.967325	0.629706	183.179	291.238	-0.667249
ENSMUST00000063292.6	Krt73	0.032766	0.967234	1.69923	335.222	197.15	0.764884
ENSMUST00000108226.7	Pex5l	0.0328746	0.967125	0.877262	2572.86	2932.91	-0.188921
ENSMUST00000189827.1	Gm29593	0.0330309	0.966969	3.44966	22.9399	6.42856	1.78645
ENSMUST00000210231.1	Mmaa	0.0333119	0.966688	0.815766	479.912	588.428	-0.293773
ENSMUST00000173780.1	Nrg3	0.0334051	0.966595	1.70948	217.983	127.274	0.773553
ENSMUST00000112501.8	Tank	0.0335221	0.966478	0.687156	101.177	147.504	-0.54129
ENSMUST00000113690.7	Tpm1	0.0335472	0.966453	1.31451	4357.62	3314.92	0.394529
ENSMUST00000023171.7	Hes1	0.0337321	0.966268	1.36828	431.542	315.299	0.452366
ENSMUST00000109737.8	H2afv	0.0337418	0.966258	0.778561	475.455	610.773	-0.361118
ENSMUST00000085374.6	Slc17a7	0.0338056	0.966194	1.30529	53759.5	41185.7	0.384371
ENSMUST00000133202.2	43712	0.0339924	0.966008	0.731023	144.006	197.205	-0.45201
ENSMUST00000113203.1	Hnrnph2	0.0340363	0.965964	2.15175	117.755	54.4148	1.10551
ENSMUST00000107214.8	Psip1	0.0340828	0.965917	1.14689	2777.76	2421.93	0.197723
ENSMUST00000034432.6	Cfdp1	0.0344204	0.96558	1.08546	2201.42	2028.07	0.118308
ENSMUST00000024706.11	Pla2g7	0.0344367	0.965563	0.793872	3939.51	4962.49	-0.333022
ENSMUST00000024762.2	Rsph9	0.034496	0.965504	1.31169	380.456	289.978	0.391421
ENSMUST00000137426.7	Eef1d	0.0345201	0.96548	6.81384	43.5648	5.89897	2.76847
ENSMUST00000114292.7	Cadm2	0.0346332	0.965367	0.826463	6604.77	7991.68	-0.274977
ENSMUST00000149261.7	Prdx5	0.0347381	0.965262	1.29403	838.521	647.858	0.371876
ENSMUST00000217050.1	Islr2	0.0352129	0.964787	2.8938	30.1332	10.0337	1.53296
ENSMUST00000077946.11	Dock10	0.0354075	0.964592	0.671479	1760.84	2622.61	-0.574585
ENSMUST00000028880.9	Slc20a1	0.0355029	0.964497	1.55579	4316.05	2773.97	0.63765
ENSMUST00000183036.1	Miat	0.035539	0.964461	0.602181	50.1756	83.7061	-0.731731
ENSMUST00000205796.1	Tubgcp5	0.0355675	0.964433	1.92529	317.184	164.467	0.945079
ENSMUST00000036303.8	Htr2c	0.0356269	0.964373	1.26593	1033.27	816.099	0.340192
ENSMUST00000183156.7	Anks1b	0.0358112	0.964189	3.53969	115.88	32.3215	1.82362
ENSMUST00000049787.2	Lrrn4	0.036054	0.963946	0.623128	50.0747	80.5487	-0.682399
ENSMUST00000028667.9	Dgkz	0.0362001	0.9638	1.58779	10211.3	6430.92	0.667023
ENSMUST00000161445.7	Ppp3cb	0.0363452	0.963655	0.875745	6382.02	7287.61	-0.191416
ENSMUST00000062028.7	Gpr61	0.0363736	0.963626	0.809596	325.437	402.053	-0.304725
ENSMUST00000080856.13	Ipo11	0.0364852	0.963515	1.35137	768.484	568.52	0.434422
ENSMUST00000190213.1	Casp8	0.036544	0.963456	2.73444	32.0135	11.3398	1.45125
ENSMUST00000216063.1	Zfp445	0.0367013	0.963299	0.873145	6186.71	7085.6	-0.195707
ENSMUST00000002079.6	Plxnb3	0.0367305	0.963269	0.73753	411.967	558.782	-0.439226
ENSMUST00000058230.12	Ensa	0.0367821	0.963218	1.33991	4101.87	3061.16	0.422135
ENSMUST00000114810.1	Xlr	0.0368009	0.963199	0.356496	6.88804	20.3679	-1.48804
ENSMUST00000093245.12	Bean1	0.0369404	0.96306	0.695773	170.244	244.936	-0.523312
ENSMUST00000059562.13	Lhfp	0.0369554	0.963045	2.63558	1247.03	472.791	1.39812
ENSMUST00000159371.1	Usf1	0.0371283	0.962872	0.714727	169.139	236.88	-0.484537
ENSMUST00000139066.7	Ccnl2	0.0371695	0.962831	0.838526	2371.38	2828.15	-0.254072
ENSMUST00000100193.7	43717	0.0372008	0.962799	0.766007	1577.13	2059.07	-0.384571
ENSMUST00000005600.5	Rfx1	0.0373418	0.962658	0.8114	734.391	905.226	-0.301514
ENSMUST00000225463.1	Camk2g	0.0376009	0.962399	4.17626	22.468	4.93906	2.06221
ENSMUST00000026585.13	Tspan4	0.0377043	0.962296	0.476531	14.5737	31.2197	-1.06936
ENSMUST00000001202.14	Ocrl	0.03782	0.96218	1.1452	1958.58	1710.17	0.195601
ENSMUST00000145195.7	Slc9b2	0.0378476	0.962152	2.98728	29.3433	9.43713	1.57883
ENSMUST00000066936.8	Gpsm1	0.0385746	0.961425	1.39388	828.517	594.231	0.479111
ENSMUST00000021119.8	Aspa	0.0385965	0.961404	0.673756	288.225	428.069	-0.569703
ENSMUST00000120709.7	Kcnt2	0.0387113	0.961289	0.636443	462.265	726.517	-0.651897
ENSMUST00000032065.14	Pcyox1	0.0389473	0.961053	0.911882	4014.95	4402.95	-0.133081
ENSMUST00000179337.8	Anks1b	0.038999	0.961001	1.24589	411.689	330.324	0.317174
ENSMUST00000031840.9	Gpnmb	0.0390532	0.960947	1.74179	212.526	121.874	0.800569
ENSMUST00000113165.7	Ralgps1	0.0394843	0.960516	1.33868	970.49	724.815	0.420808
ENSMUST00000077182.12	Nrxn2	0.0397255	0.960274	1.50499	1201.47	798.131	0.589752
ENSMUST00000103019.1	Aatk	0.0399107	0.960089	0.489757	718.868	1468.41	-1.02986
ENSMUST00000044484.12	Kdm6a	0.0402183	0.959782	0.752589	336.043	446.706	-0.410066
ENSMUST00000031613.10	Aimp2	0.0402383	0.959762	1.38567	339.13	244.579	0.470585
ENSMUST00000029667.12	Kcnq5	0.0402782	0.959722	0.692475	2238.7	3233.15	-0.530166
ENSMUST00000143075.1	Abca2	0.0404861	0.959514	2.21832	83.3462	37.2534	1.14947
ENSMUST00000207114.1	Slc35a2	0.0405045	0.959496	5.43399	16.0013	2.47167	2.44201
ENSMUST00000114777.8	Pias2	0.0406309	0.959369	1.15086	2104.94	1828.94	0.202712
ENSMUST00000063775.3	Ldlrad4	0.0409202	0.95908	1.32105	808.813	612.173	0.401687
ENSMUST00000149854.7	Gpcpd1	0.0411245	0.958875	0.586309	298.58	509.663	-0.770268
ENSMUST00000112847.8	Mapk10	0.0411685	0.958832	0.783855	4010.6	5116.66	-0.351342
ENSMUST00000201218.1	Senp7	0.0413041	0.958696	3.46215	66.4896	18.9666	1.79167
ENSMUST00000066378.7	Gm6457	0.0413431	0.958657	0.454815	15.3971	34.5485	-1.13665
ENSMUST00000210911.1	Arfip2	0.0413837	0.958616	1.35984	210.287	154.488	0.443435
ENSMUST00000121875.7	Myo5b	0.0416086	0.958391	0.669808	1423.9	2126.11	-0.578181
ENSMUST00000038275.10	Mylip	0.0417333	0.958267	1.1843	925.769	781.652	0.24403
ENSMUST00000089883.5	Masp1	0.0418496	0.95815	1.39507	266.762	191.129	0.480341
ENSMUST00000040853.10	Oxsr1	0.0419187	0.958081	0.896876	1561.6	1741.2	-0.157019
ENSMUST00000034413.7	Vstm5	0.041942	0.958058	0.752304	218.581	290.651	-0.410612
ENSMUST00000124387.1	Zfp324	0.0419486	0.958051	0.688502	101.649	147.9	-0.538468
ENSMUST00000072671.13	Nrxn1	0.0420231	0.957977	0.848675	6457.16	7608.63	-0.236717
ENSMUST00000177025.1	Traf7	0.0425096	0.95749	0.296576	6.09555	21.9279	-1.75353
ENSMUST00000138356.7	Phldb1	0.0426617	0.957338	0.740717	931.271	1257.46	-0.433005
ENSMUST00000052374.11	Rangap1	0.0435378	0.956462	1.22195	7575.09	6199.08	0.289183
ENSMUST00000115828.8	Clec16a	0.043688	0.956312	1.60737	292.84	181.967	0.684699
ENSMUST00000053949.6	Shisa2	0.0438541	0.956146	0.693798	124.288	179.279	-0.527412
ENSMUST00000066296.8	Togaram1	0.0439343	0.956066	0.899185	1460.48	1624.3	-0.153311
ENSMUST00000026659.9	Tmc6	0.0440558	0.955944	2.29913	295.365	128.14	1.20109
ENSMUST00000199947.1	Sparcl1	0.0440993	0.955901	1.61109	747.68	463.864	0.688034
ENSMUST00000153627.7	Tdp1	0.0441385	0.955861	1.80148	530.687	294.327	0.84918
ENSMUST00000041783.13	Iqce	0.0442694	0.955731	0.71787	237.493	330.961	-0.478206
ENSMUST00000053862.11	Pqlc2	0.0443251	0.955675	1.70905	101.763	59.3034	0.773192
ENSMUST00000218478.1	Arhgef25	0.0445416	0.955458	0.749034	677.635	904.873	-0.416898
ENSMUST00000007961.14	Zmiz1	0.0447076	0.955292	1.63165	303.61	185.851	0.706328
ENSMUST00000133925.7	Terf2	0.0448626	0.955137	0.794577	399.213	502.573	-0.331742
ENSMUST00000196254.4	Fdps	0.0450124	0.954988	5.60102	19.2038	2.95245	2.48569
ENSMUST00000155825.1	Slc39a14	0.0450951	0.954905	2.94303	27.367	9.07784	1.5573
ENSMUST00000073787.6	Akr7a5	0.0451222	0.954878	1.21708	620.885	510.085	0.28343
ENSMUST00000046223.13	Abca8a	0.045158	0.954842	0.511356	201.552	394.705	-0.9676
ENSMUST00000221971.1	Daam1	0.0453953	0.954605	0.574428	29.5635	51.714	-0.799803
ENSMUST00000117654.2	Tbrg1	0.0461302	0.95387	1.15123	1064.78	924.859	0.203179
ENSMUST00000026698.7	Podxl	0.0461752	0.953825	0.872149	1056.7	1211.65	-0.197353
ENSMUST00000163230.7	Cd200	0.0462336	0.953766	1.20761	2790.99	2311.07	0.27215
ENSMUST00000109384.9	Tomm34	0.0467059	0.953294	0.798692	2281.99	2857.31	-0.324289
ENSMUST00000106544.1	Otop2	0.0468749	0.953125	3.42673	46.0006	13.0135	1.77683
ENSMUST00000031355.9	Uso1	0.0469464	0.953054	1.09608	2948.45	2689.95	0.132348
ENSMUST00000129593.8	Erlec1	0.0469743	0.953026	1.66333	251.017	150.681	0.734074
ENSMUST00000152544.7	Plk5	0.0472901	0.95271	0.420919	43.1054	102.868	-1.24838
ENSMUST00000023138.7	Shisa9	0.0473133	0.952687	0.844697	1677.7	1986.27	-0.243494
ENSMUST00000110766.7	Fbxl18	0.0477186	0.952281	0.834731	1604.69	1922.47	-0.260616
ENSMUST00000149756.7	Tulp4	0.0483228	0.951677	1.28298	4228.22	3295.48	0.359504
ENSMUST00000036225.14	Mpp6	0.0485854	0.951415	1.37784	514.62	373.34	0.462406
ENSMUST00000025228.11	Cdc23	0.0485975	0.951402	1.24344	429.558	345.347	0.314333
ENSMUST00000172431.7	Gm3512	0.0488008	0.951199	0.547832	48.3329	88.7042	-0.868195
ENSMUST00000035657.8	Tssc1	0.0488538	0.951146	1.31615	585.825	444.964	0.396328
ENSMUST00000071465.8	Zkscan6	0.0490369	0.950963	0.760173	389.626	512.732	-0.3956
ENSMUST00000176054.1	Mta3	0.0491747	0.950825	2.15139	62.5062	28.7436	1.10527
ENSMUST00000164490.1	Slc7a4	0.0493558	0.950644	1.69493	68.25	40.0294	0.76123
ENSMUST00000147009.1	Rmnd5b	0.049373	0.950627	2.76124	23.6873	8.20876	1.46532
ENSMUST00000126401.1	Gm13716	0.0494131	0.950587	2.01257	109.515	54.2587	1.00904
ENSMUST00000078691.11	Bak1	0.0495147	0.950485	0.64902	93.4713	144.333	-0.623665
ENSMUST00000116234.8	Arl1	0.0495324	0.950468	1.1313	5581.67	4933.82	0.177981
ENSMUST00000118485.7	Megf11	0.049577	0.950423	4.10078	156.762	37.7891	2.0359
